# Supplementary material
Source: publisher figshare collection journal article supplement (https://brill.figshare.com/articles/dataset/_/7092860)

# “Pedagogical Applications of Research into Embodied Grammar”

Laura A. Janda  
University of Tromsø

# Overview

- What is the Role of Linguistics?
- Narrow Scope vs. Broad Scope agendas
- Three Examples of Theory and Application
  - Case meaning
  - Aspect meaning
  - Aspectual clusters of verbs
- Relevant Works in Theory and Application

# What is the Role of Linguistics?

- Pure theory – science for science's sake
- Application – science for other people too
  - creation of teaching materials, reference grammars, dictionaries
  - computer software: translation, language recognition, text interpretation
  - field work on languages, dialects
  - language planning/policy, intervention
- Cognitive linguistics
  - has a tradition of being accountable to other disciplines, so why not be accountable to society?
  - is transparent enough to be used in application

# Narrow Scope vs. Broad Scope

## Different audiences, different goals

### Narrow (theory-based)

- Scholarly publications
- Peer review
- Specific theoretical contributions

### Broad (application-based)

- Pedagogical materials
- Complete coverage

**Both approaches  
can contribute  
to a research agenda**

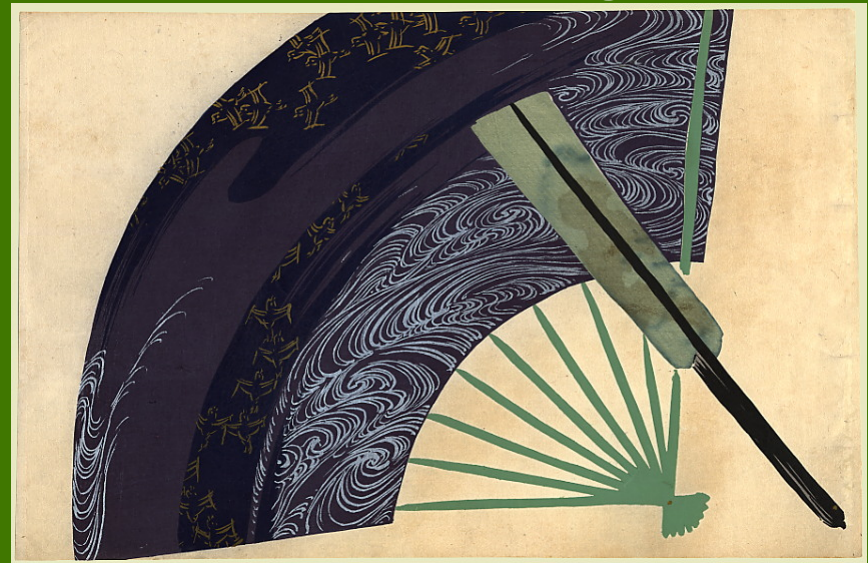

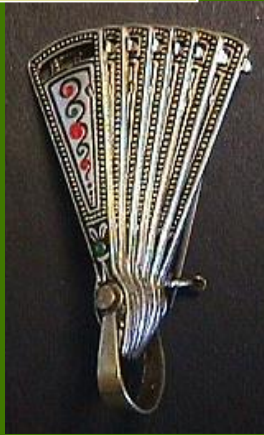

**Linguistic  
research**

**Pedagogical  
materials**

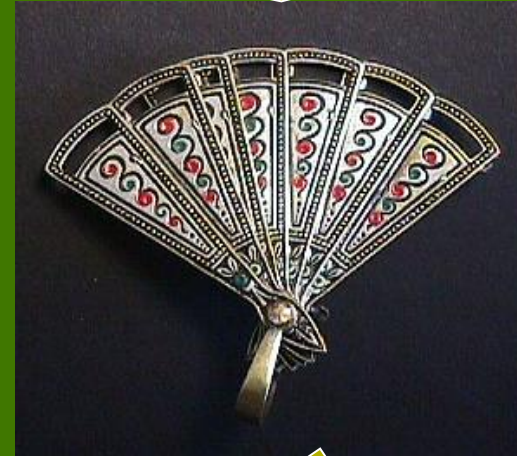

**Further  
linguistic  
research**

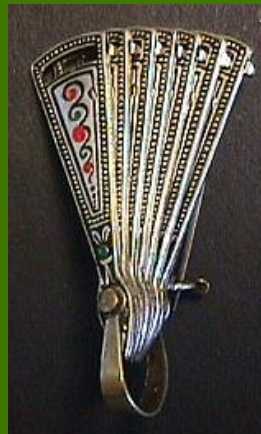

# Applications inspired by theory and theory inspired by applications

## Three Examples

- Case meaning
- Aspect meaning
- Aspectual clusters of verbs

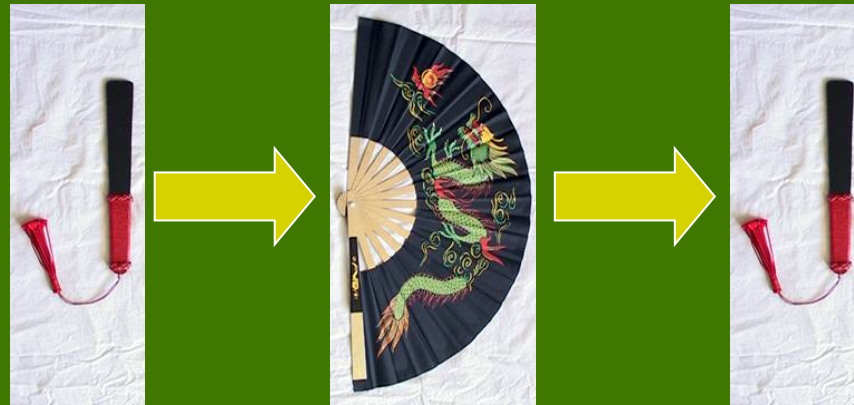

**In each instance, primary research  
served as the basis for pedagogical  
materials, and in turn, work on  
pedagogical materials led to further  
progress in research**

# Case Meaning

## Main Ideas:

- Most Slavic languages obligatorily mark all NPs with one of six or seven cases: N, A, D, G, L, I, (V)
- Each case is **polysemous**, with meanings arranged in a **radial category**, which forms a **coherent whole**
- **Prototypical meanings** are based on embodied **physical** experience; **peripheral** meanings are extended via **metaphor** and **metonymy**

# Case Meaning

## An example:

- The Russian genitive case is used with prepositions meaning 'from' to indicate physical withdrawal and also with verbs meaning 'fear', 'be ashamed of' indicating emotional (metaphorical) withdrawal
- **Physical withdrawal:**  
*Doč' prišla iz školy*  
[Daughter–N came from school–G]  
'My daughter has come from school'
- **Metaphorical withdrawal:**  
*Doč' bojalas'/stydilas' bednosti*  
[Daughter–N feared/was ashamed poverty–G]  
'My daughter was afraid/ashamed of poverty'

# Case Meaning

## Individual studies of case meaning:

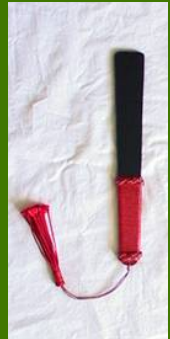

Pragmatic & semantic (1988)

Dative & Instrumental (1993)

Genitive (1999)

Accusative (2000)

## Pedagogical/linguistic resources:

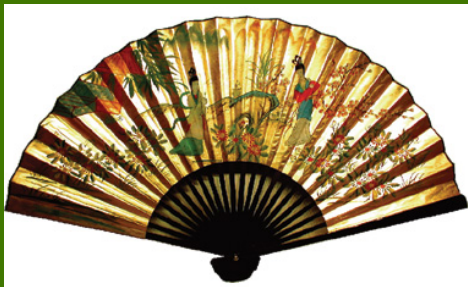

Case Book for Russian (2002)

Case Book for Czech (2006)

Reference grammar of Czech (2000)

## DEMONSTRATIONS

# Further case research inspired by applications

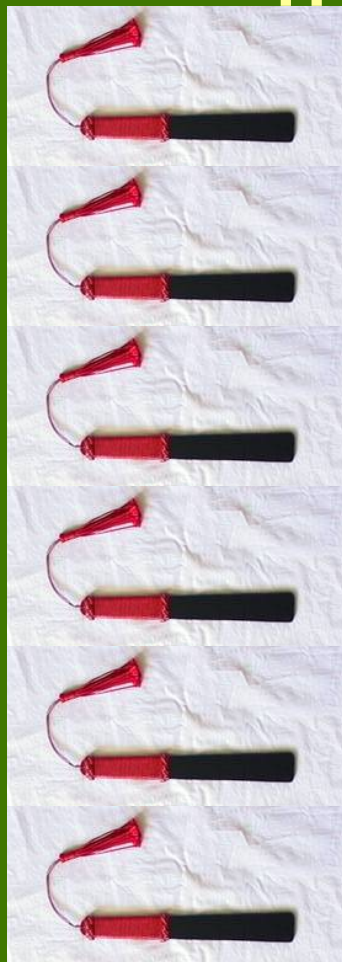

- Case government by nouns and adjectives
- Near-synonymy of different cases within Russian & across Slavic
- Comparison of time expressions across Czech, Polish, Russian
- MDS modeling of case across Slavic languages (Clancy 2006)
- Case as an element in construction grammar (with Solovyev)
- Use of case in attenuated agency (with Divjak)

# Aspect Meaning

## Main Ideas:

- Slavic Aspect contrasts
  - Perfective **vs.** Imperfective
- This contrast is metaphorically motivated by embodied physical experience with
  - discrete solid objects (Perfective) **vs.**
  - fluid substances (Imperfective)
- This contrast is relevant at the level of event structure, discourse, and pragmatics

# Aspect Meaning

## An example:

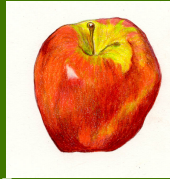

### Discrete solid object:

Has shape/edges, is unique, two cannot occupy the same place

### Perfective event:

Has clear beginning/end, is unique, expresses sequences

*Oleg **sel** v mašinu i poexal v restoran*

‘Oleg **got into** the car and **drove** to the restaurant’

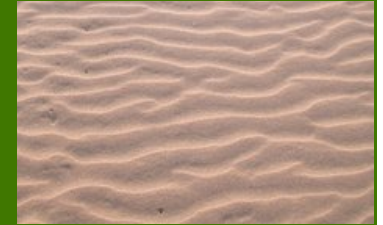

### Fluid substance:

Has no shape/edges, is not unique, two can be mixed in the same place

### Imperfective event:

No clear beginning/end, not unique, expresses simultaneity

*Oleg **nosil** galstuk i **ezdil** na sportivnoj mašine*

‘Oleg **wore** a tie and **drove** a sportscar’

# Aspect Meaning

Perfective vs. Imperfective:  
Metaphorical model (2004)

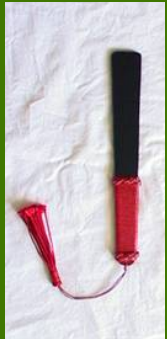

Pedagogical/linguistic resources:  
User-friendly model  
for instructors (2003)



[Aspect in Russian Media Module](#)

**DEMONSTRATION**

# Further aspect metaphor research inspired by applications

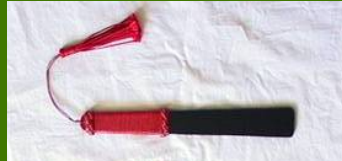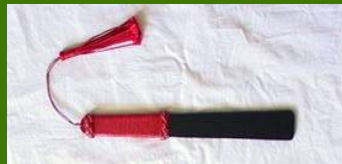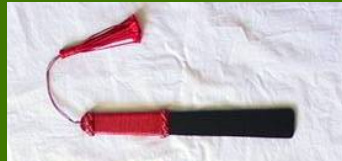

- Differences in metaphorical extension across Slavic
- Conversion patterns and aspectual clusters
- Semantic motivations for aspectual clusters

# Aspectual Clusters of Verbs

## Main Ideas:

- Traditional “pair” model fails to account for aspectual relationships among verbs
- **Four** different types of **Perfective verbs** can be distinguished on the basis of both meaning (metaphorically motivated) and word-formation
  - **Natural Perfective, Specialized Perfective, Complex Act Perfective, Single Act Perfective**
- An **aspectual cluster** contains an Imperfective Activity verb plus 0–4 types of Perfective verbs
- An **implicational hierarchy** predicts the structures of existing clusters

# Aspectual Clusters of Verbs

## An example:

### Activity

ščipat' 'pinch/pluck'

> (Natural/Specialized Perfective)

o(b)ščipat' 'pinch/pluck'/vyščipat' 'pluck out'

> Complex Act

poščipat' 'pinch/pluck a while'

> Single Act

ščipnut' 'pinch/pluck once'

# Aspectual Clusters of Verbs

Aspectual clusters and their structures:



Study using linguistic database (2007)  
all morphological types

Pedagogical/linguistic  
resources:

Study using pedagogical  
database

hi-freq textbook verbs

Cluster Types for Russian Verbs

Exploring Emptiness database

**DEMONSTRATION**

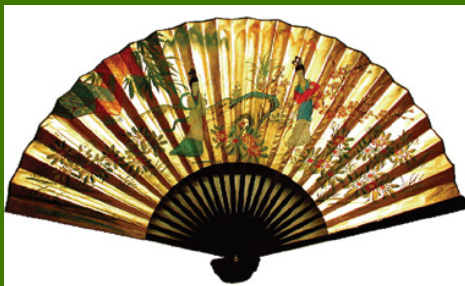

# Further verb clusters research inspired by applications

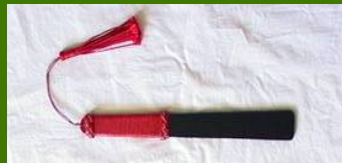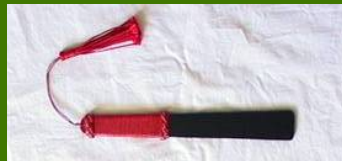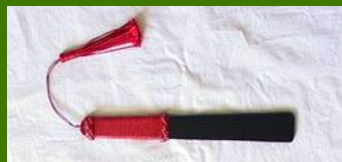

- Place of motion verbs in clusters model
- Place of biaspectual verbs in clusters model
- Differences in token vs. type frequency effects in verb clusters
- Conceptual overlap in so-called “empty prefixes”

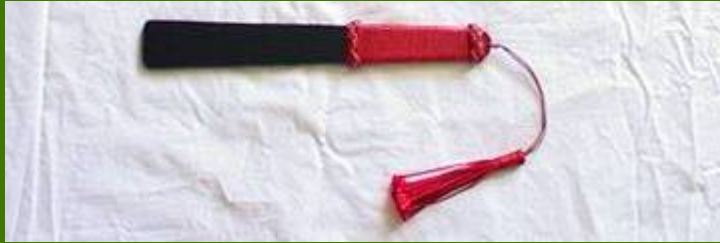

Relevant Works:  
primary research

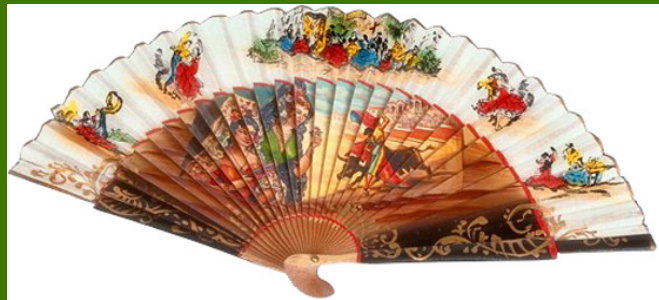

Relevant Works:  
applications

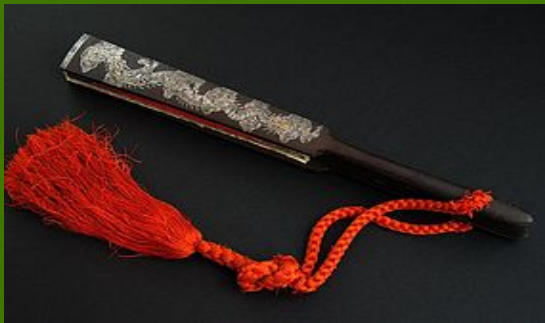

Relevant Works: research  
inspired by applications

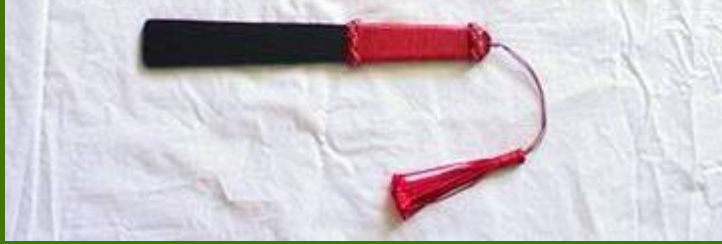

## Relevant Works: primary research

- 1988. “Pragmatic vs. Semantic Uses of Case”, in *Chicago Linguistic Society 24-I: Papers from the Twenty-Fourth Regional Meeting*, ed. by Diane Brentari et al. Chicago: U of Chicago Press, 189–202.
- 1993. *A Geography of Case Semantics: The Czech Dative and the Russian Instrumental* (= *Cognitive Linguistics Research*, v. 4). Berlin: Mouton de Gruyter.
- 1999. “Peircean semiotics and cognitive linguistics: a case study of the Russian genitive”, in *The Peirce Seminar Papers*, ed. by Michael Shapiro. New York/Oxford: Berghahn Books, 441–466.
- 2000. “A cognitive model of the Russian accusative case”, in *Trudy meždunarodnoj konferencii Kognitivnoe modelirovanie*, No. 4, part I, ed. by R. K. Potapova, V. D. Solov’ev and V. N. Poljakov. Moscow: MISIS, 20–43.
- 2004. “A metaphor in search of a source domain: the categories of Slavic aspect”, *Cognitive Linguistics* 15:4, 471–527.
- 2007. “Aspectual clusters of Russian verbs”, *Studies in Language* 31:3, 607–648.

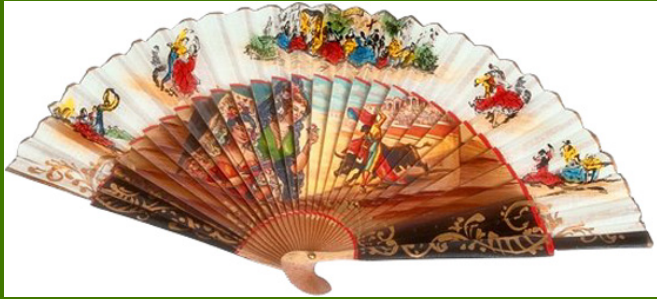

# Relevant Works: applications

- 2000. *Czech* (= *Languages of the World/Materials* 125), coauthored with Charles E. Townsend. Munich/Newcastle: LINCOM EUROPA. [Online version](#)
- 2002. *The Case Book for Russian*. co-authored with Steven J. Clancy. Bloomington, IN: Slavica. [Online exercises](#)
- 2002. “Sémantika pádů v češtině”, in *Setkání s češtinou*, ed. by Alena Krausová, Markéta Slezáková, and Zdeňka Svobodová. Prague: Ústav pro jazyk český, 29–35.
- 2003. “A user-friendly conceptualization of Aspect”, *Slavic and East European Journal* 47:2, 251–281.
- 2006. *The Case Book for Czech*. co-authored with Steven J. Clancy. Bloomington, IN: Slavica. [Online exercises](#)
- Submitted. “Beyond the pair: Aspectual clusters for learners of Russian”, coauthored with John J. Korba.
- 2007. “Studenty-pol’zovateli nacional’nogo korpusa russkogo jazyka”, in *Nacional’nyj korpus russkogo jazyka i problemy gumanitarnogo obrazovanija*, edited by Nina Dobrushina, Moscow: Teis. 59–72.
- 2008. “Beyond the pair: Aspectual clusters for learners of Russian”, coauthored with John J. Korba, *Slavic and East European Journal* 52:2, 254–270.
- [Aspect in Russian Media Module](#), [Cluster Types for Russian Verbs](#)

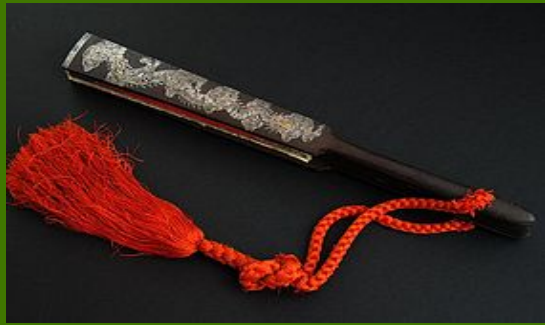

## Relevant Works: research inspired by applications

- 2002. “Cases in collision, cases in collusion: the semantic space of case in Czech and Russian”, in *Where One’s Tongue Rules Well: A Festschrift for Charles E. Townsend*, ed. by Laura A. Janda, Steven Franks, and Ronald Feldstein. Columbus, Ohio: Slavica, 43–61.
- 2002. “Cognitive hot spots in the Russian case system”, in Michael Shapiro, ed. *Peircean Semiotics: The State of the Art* (= *The Peirce Seminar Papers* 5). New York: Berghahn Books, 165–188.
- 2002. “The conceptualization of events and their relationship to time in Russian”, in *Glossos* 2 at <http://www.seelrc.org/glossos/>.
- 2002. “The Case for Competing Conceptual Systems”, in *Cognitive Linguistics Today* (= *Łódź Studies in Language* 6), ed. by Barbara Lewandowska-Tomaszczyk and Kamila Turewicz, Frankfurt: Peter Lang, 355–374.
- 2002. “Concepts of Case and Time in Slavic”, in *Glossos* 3 at <http://www.seelrc.org/glossos/>.
- 2004. “Border zones in the Russian case system”, in *Sokrovennye smysly* (a festschrift for Nina D. Arutjunova), ed. by Ju. D. Apresjan. Moscow: Jazyki slavjanskoj kul’tury, 378–398.
- 2004. “The Dative Case in Czech: What it Means and How *si* Fits in”, in the published proceedings of the annual meeting of the Společnost pro vědy a umění 2003, published in 2004 at: <http://www.svu2000.org/conferences/papers.htm>.

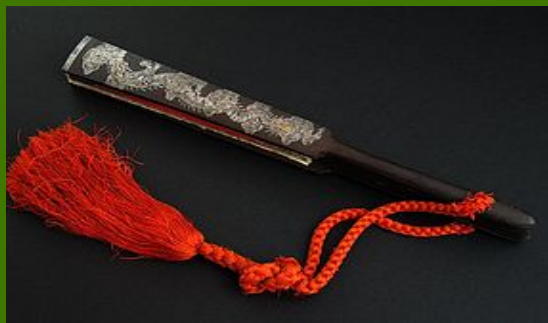

## Relevant Works: research inspired by applications

- 2006. “A Metaphor for Aspect in Slavic”, *Henrik Birnbaum in Memoriam* (=International Journal of Slavic Linguistics and Poetics 44–45, 249–60.
- Clancy, Steven J. 2006. “The Topology of Slavic Case: Semantic Maps and Multidimensional Scaling“, in Glossos 6, at <http://seelrc.org/glossos/issues/7/>.
- 2007. “What makes Russian Bi-aspectual verbs Special”, in: Dagmar Divjak and Agata Kochanska, eds. *Cognitive Paths into the Slavic Domain. Cognitive Linguistics Research*. Berlin/New York: Mouton de Gruyter. 83–109.
- 2008. “From Cognitive Linguistics to Cultural Linguistics”, *Slovo a smysl/Word and Sense* 8 (2008), pp. 48–68.
- 2008. “Semantic Motivations for Aspectual Clusters of Russian Verbs”. In Christina Y. Bethin, ed. *American Contributions to the 14th International Congress of Slavists, Ohrid, September 2008*. Bloomington, IN: Slavica Publishers. pp. 181–196.
- 2008. “Ways of attenuating agency in Russian”, coauthored with Dagmar Divjak. *Impersonal Constructions in Grammatical Theory*, edited by Anna Siewierska, a special issue of *Transactions of the Philological Society* (v. 106), 138–179.
- 2008. “Transitivity in Russian from a Cognitive Perspective”, in *Dinamičeskie modeli: Slovo. Predloženie. Tekst. Sbornik statej v čest’ E. V. Padučevoj*, edited by Galina Kustova. Moscow: Jazyki slavjanskoj kul’tury. 2008. pp. 970–988.
- 2009. “Totally normal chaos: The aspectual behavior of Russian motion verbs”, *Harvard Ukrainian Studies* vol. 28, 183–193.
- ...And many more forthcoming

# The end

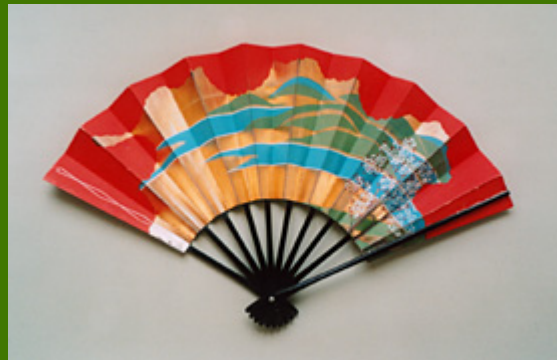

Supplement: Supplementary file 1 [file 1 › Janda 8. pedagogical applications.ppt.pdf]
