# Supplementary material
Source: publisher figshare collection journal article supplement (https://brill.figshare.com/articles/dataset/_/7092860)
Supplement: Supplementary file 1 [file 1]

Archive with 18 entries (18 files):
- Janda 1. coglx to cultlx handout.pdf
- Janda 1. Coglx to cultlx.ppt.pdf
- Janda 2. Conceptual overlap handout.pdf
- Janda 3. Metaphor in grammar handout.pdf
- Janda 4. metonymy handout.pdf
- Janda 5. constructional profiles handout.pdf
- Janda 6. grammatical profiles handout.pdf
- Janda 7. semantic maps handout.pdf
- Janda 9. ling concepts handout.pdf
- Janda 2. Conceptual overlap.ppt.pdf
- Janda 3. Metaphor in grammar.ppt.pdf
- Janda 4. metonymy in w-f.ppt.pdf
- Janda 5. constructional profiles.ppt.pdf
- Janda 6. grammtical profiles.ppt.pdf
- Janda 7. Semantic maps.ppt.pdf
- Janda 8. pedagogical applications.ppt.pdf
- Janda 9. linguistic concepts.ppt.pdf
- Janda 10. paradigm structure.ppt.pdf
