# Supplementary material
Source: publisher figshare collection journal article supplement (https://brill.figshare.com/articles/dataset/_/7092860)
Supplement: Supplementary file 1 [file 1 › Janda 2. Conceptual overlap handout.pdf]

# Conceptual Overlap and the Illusion of Semantic Emptiness

Laura A. Janda, Tore Nessel, and the CLEAR group at UiT

## Radial Category Profiling: Case study of RAZ-

| 1. physical apart     |                                | base verb        |                                 |
|-----------------------|--------------------------------|------------------|---------------------------------|
| <i>razbežat'sja</i>   | 'run in different directions'  | <i>bežat'</i>    | 'run'                           |
| <i>razvezti</i>       | 'deliver to various places'    | <i>vezti</i>     | 'carry by vehicle'              |
| <i>razvesti(s')</i>   | 'divorce'                      | <i>vesti</i>     | 'lead'                          |
| <i>razvejat'(sja)</i> | 'disperse'                     | <i>vejat'</i>    | 'blow, winnow'                  |
| <i>razgraničit'</i>   | 'separate by a border'         | <i>graničit'</i> | 'border on, be contiguous with' |
| <i>razlomat'</i>      | 'break in pieces'              | <i>lomat'</i>    | 'break'                         |
| <i>razmetat'</i>      | 'scatter'                      | <i>metat'</i>    | 'throw'                         |
| <i>raznesti</i>       | 'deliver, disperse'            | <i>nesti</i>     | 'carry'                         |
| <i>razojtis'</i>      | 'walk in different directions' | <i>idti</i>      | 'walk'                          |
| <i>razoslat'</i>      | 'distribute'                   | <i>slat'</i>     | 'send'                          |
| <i>razrubit'</i>      | 'chop apart'                   | <i>rubit'</i>    | 'chop, fell'                    |
| <i>raskusit'</i>      | 'bite through'                 | <i>kusit'</i>    | 'bite'                          |
| <i>raspilit'</i>      | 'saw apart'                    | <i>pilit'</i>    | 'saw'                           |

| 2. crush              |                     | base verb          |                  |
|-----------------------|---------------------|--------------------|------------------|
| <i>razbombit'</i>     | 'bomb flat'         | <i>bombit'</i>     | 'bomb'           |
| <i>razvalit'(sja)</i> | 'collapse'          | <i>valit'</i>      | 'topple'         |
| <i>razrušit'(sja)</i> | 'destroy, collapse' | <i>rušit'(sja)</i> | 'pull/fall down' |
| <i>rastoptat'</i>     | 'trample, crush'    | <i>toptat'</i>     | 'stamp feet'     |

| 3. spread           |                           |                  |                 |
|---------------------|---------------------------|------------------|-----------------|
| <i>razvit'(sja)</i> | 'expand, unwind, develop' | <i>vit'(sja)</i> | 'twist, wind'   |
| <i>razmazat'</i>    | 'spread, smear'           | <i>mazat'</i>    | 'smear, grease' |
| <i>razrastis'</i>   | 'grow thickly, spread'    | <i>rasti</i>     | 'grow'          |
| <i>razrisovat'</i>  | 'draw all over'           | <i>risovat'</i>  | 'draw'          |
| <i>raskatat'</i>    | 'unroll, roll out'        | <i>katat'</i>    | 'roll'          |
| <i>raskrasit'</i>   | 'paint/color all over'    | <i>krasit'</i>   | 'paint'         |

| 4. metaphorical spread  |                                   | base verb            |                  |
|-------------------------|-----------------------------------|----------------------|------------------|
| <i>razobrat'sja</i>     | 'sort out, make sense of, unpack' | <i>brat'sja</i>      | 'take up, start' |
| <i>razrabotat'</i>      | 'work out, elaborate'             | <i>rabotat'</i>      | 'work'           |
| <i>razreklamirovat'</i> | 'publicize all over'              | <i>reklamirovat'</i> | 'advertise'      |
| <i>raspisat'</i>        | 'enter figures into account book' | <i>pisat'</i>        | 'write'          |

| 5. soften, dissolve    |                    | base verb           |              |
|------------------------|--------------------|---------------------|--------------|
| <i>razmyt'</i>         | 'erode, wash away' | <i>myt'</i>         | 'wash'       |
| <i>razmjat'sja</i>     | 'soften up'        | <i>mjat'</i>        | 'knead'      |
| <i>rastvorit'(sja)</i> | 'dissolve'         | <i>tvorit'(sja)</i> | 'do, happen' |

| 6. swell            |                          | base verb      |             |
|---------------------|--------------------------|----------------|-------------|
| <i>razdut'(sja)</i> | 'inflate'                | <i>dut'</i>    | 'blow'      |
| <i>razžitsja</i>    | 'get rich'               | <i>žit'</i>    | 'live'      |
| <i>raskisnut'</i>   | 'rise from fermentation' | <i>kisnut'</i> | 'turn sour' |
| <i>raspaxat'</i>    | 'plough up'              | <i>paxat'</i>  | 'plough'    |

| 7. excite        |                  | base verb     |                |
|------------------|------------------|---------------|----------------|
| <i>razogret'</i> | 'warm up'        | <i>gret'</i>  | 'radiate heat' |
| <i>raskalit'</i> | 'make red-hot'   | <i>kalit'</i> | 'heat, roast'  |
| <i>rasparit'</i> | 'cause to sweat' | <i>parit'</i> | 'steam'        |

| 8. metaphorical excite |                                | base verb          |              |
|------------------------|--------------------------------|--------------------|--------------|
| <i>razveselit'sja</i>  | 'cheer up'                     | <i>veselit'sja</i> | 'be happy'   |
| <i>razdosadovat'</i>   | 'annoy'                        | <i>dosadovat'</i>  | 'be annoyed' |
| <i>razygrat'sja</i>    | 'get carried away with a game' | <i>igrat'</i>      | 'play'       |
| <i>razrugat'sja</i>    | 'quarrel'                      | <i>rugat'sja</i>   | 'curse'      |

| 9. un-, dis-           |                         | base verb         |                       |
|------------------------|-------------------------|-------------------|-----------------------|
| <i>razyjazat'(sja)</i> | 'untie'                 | <i>vjazat'</i>    | 'tie'                 |
| <i>razgruzit'</i>      | 'unload'                | <i>gruzit'</i>    | 'load'                |
| <i>razlepit'</i>       | 'unstick'               | <i>lepit'</i>     | 'stick'               |
| <i>razmorožit'</i>     | 'defrost'               | <i>morožit'</i>   | 'freeze'              |
| <i>razoblačit'</i>     | 'expose, reveal'        | <i>oblačit'</i>   | 'robe'                |
| <i>razognut'sja</i>    | 'straighten up'         | <i>gnut'sja</i>   | 'bend'                |
| <i>raz"edinit'</i>     | 'disconnect'            | <i>edinit'</i>    | 'unite'               |
| <i>raskryt'(sja)</i>   | 'open, uncover, reveal' | <i>kryt'(sja)</i> | 'cover, be concealed' |

| 10. metaphorical un-     |                            | base verb        |                        |
|--------------------------|----------------------------|------------------|------------------------|
| <i>razgadat'</i>         | 'solve a puzzle'           | <i>gadat'</i>    | 'guess, tell fortunes' |
| <i>razdumat'</i>         | 'change your mind'         | <i>dumat'</i>    | 'think'                |
| <i>razljubit'</i>        | 'stop loving'              | <i>ljubit'</i>   | 'love'                 |
| <i>razočarovat'(sja)</i> | 'make/be disappointed'     | <i>čarovat'</i>  | 'charm'                |
| <i>razučit'sja</i>       | 'forget how to'            | <i>učit'sja</i>  | 'learn'                |
| <i>rasšifrovat'</i>      | 'decipher'                 | <i>šifrovat'</i> | 'encipher'             |
| <i>rasplatit'sja</i>     | 'pay off, settle accounts' | <i>platit'</i>   | 'pay'                  |

| 11. ingressive          |                               | base verb           |                       |
|-------------------------|-------------------------------|---------------------|-----------------------|
| <i>rasxoxotat'sja</i>   | 'start guffawing'             | <i>xoxotat'</i>     | 'guffaw'              |
| <i>razvolnovat'sja</i>  | 'become upset, start fussing' | <i>volnovat'sja</i> | 'worry, fuss'         |
| <i>razgovorit'(sja)</i> | 'get to talking'              | <i>govorit'</i>     | 'talk'                |
| <i>razžeč'</i>          | 'kindle'                      | <i>žeč'</i>         | 'burn'                |
| <i>rasplakat'sja</i>    | 'burst into tears'            | <i>plakat'</i>      | 'cry'                 |
| <i>rastrogat'(sja)</i>  | 'move/be moved to tears'      | <i>trogat'(sja)</i> | 'affect, be affected' |

**Table 1: Some of the 1000 verbs that use *raz-* for their Specialized Perfective (lexical prefix) or Complex Act Perfective (superlexical prefix, cf. subcategory 11)**

| 1. physical apart     |                                   |                        |                                  |
|-----------------------|-----------------------------------|------------------------|----------------------------------|
| <i>razbit'</i>        | 'break'                           | <i>razgryzt'</i>       | 'gnaw apart'                     |
| <i>razodrat'</i>      | 'rip apart'                       | <i>razdrobit'(sja)</i> | 'crumble'                        |
| <i>raskolot'</i>      | 'chop up'                         | <i>raskroit'</i>       | 'cut up'                         |
| <i>raskromsat'</i>    | 'cut up'                          | <i>raskrošit'(sja)</i> | 'crumble'                        |
| <i>razmel'čit'</i>    | 'crumble'                         | <i>razmočalit'</i>     | 'break down into fibers'         |
| <i>raspotrošit'</i>   | 'disembowel, take apart'          | <i>rasporot'(sja)</i>  | 'rip apart'                      |
| <i>razorvat'(sja)</i> | 'explode'                         | <i>razrezat'</i>       | 'cut up'                         |
| <i>rasteret'</i>      | 'pulverize'                       | <i>rasterzat'</i>      | 'tear apart'                     |
| <i>rastoloč'</i>      | 'pulverize'                       | <i>rastrepat'</i>      | 'shake up/apart'                 |
| <i>rasčesat'</i>      | 'comb apart'                      | <i>rasčekanit'</i>     | 'cut apart (metal)'              |
| <i>razryxlet'</i>     | 'become particulate (soil, snow)' | <i>razryxlit'</i>      | 'break up into particles (soil)' |

| 2. crush            |           |                  |         |
|---------------------|-----------|------------------|---------|
| <i>razgromit'</i>   | 'destroy' | <i>razdavit'</i> | 'crush' |
| <i>raspljuščit'</i> | 'flatten' | <i>razmjat'</i>  | 'crush' |
| <i>rasplastat'</i>  | 'flatten' |                  |         |

| 3. spread              |                       |                      |                                      |
|------------------------|-----------------------|----------------------|--------------------------------------|
| <i>razdelit'(sja)</i>  | 'divide up'           | <i>razmenjat'</i>    | 'get change from big piece of money' |
| <i>razroznit'</i>      | 'break up a set of'   | <i>rasfasovat'</i>   | 'pre-pack in measured quantities'    |
| <i>rasčlenit'(sja)</i> | 'break up into parts' | <i>razvetvit'sja</i> | 'branch out'                         |

|                                    |                       |                    |                     |
|------------------------------------|-----------------------|--------------------|---------------------|
| <i>rasplodit'</i> ( <i>sja</i> )   | 'multiply'            | <i>raspjalit'</i>  | 'stretch out'       |
| <i>rastopyrit'</i>                 | 'spread (arms, legs)' | <i>razrovnjat'</i> | 'level, spread out' |
| <i>razrumjanit'</i> ( <i>sja</i> ) | '(make) blush'        |                    |                     |

|                               |                                 |                            |                              |
|-------------------------------|---------------------------------|----------------------------|------------------------------|
| <b>4. metaphorical spread</b> |                                 |                            |                              |
| <i>razgrafit'</i>             | 'depict in graphs'              | <i>rasklassificirovat'</i> | 'classify, sort into groups' |
| <i>rasplanirovat'</i>         | 'work out a plan'               | <i>rassortirovat'</i>      | 'sort into groups'           |
| <i>rastranzirit'</i>          | 'squander money in many places' | <i>rastrezvonit'</i>       | 'spread the word'            |

|                                 |                      |                                  |                                 |
|---------------------------------|----------------------|----------------------------------|---------------------------------|
| <b>5. soften, dissolve</b>      |                      |                                  |                                 |
| <i>razmjaknut'</i>              | 'soften'             | <i>rasplavit'</i> ( <i>sja</i> ) | 'make/become liquid by heating' |
| <i>rastajat'</i>                | 'melt'               | <i>raz"est'</i>                  | 'corrode'                       |
| <i>rastopit'</i> ( <i>sja</i> ) | 'liquefy by heating' |                                  |                                 |

|                     |               |                                    |                      |
|---------------------|---------------|------------------------------------|----------------------|
| <b>6. swell</b>     |               |                                    |                      |
| <i>razbuxnut'</i>   | 'swell'       | <i>razžiret'</i>                   | 'get fat'            |
| <i>raskosmatit'</i> | 'make shaggy' | <i>razloxmatit'</i> ( <i>sja</i> ) | 'make/become shaggy' |
| <i>raspuxnut'</i>   | 'swell'       | <i>raspušit'</i>                   | 'make fluffy'        |
| <i>rastolstet'</i>  | 'get fat'     | <i>razbogatet'</i>                 | 'become rich'        |
| <i>razdobret'</i>   | 'become fat'  |                                    |                      |

|                    |                   |                     |                     |
|--------------------|-------------------|---------------------|---------------------|
| <b>7. excite</b>   |                   |                     |                     |
| <i>razberedit'</i> | 'irritate'        | <i>razbudit'</i>    | 'wake up'           |
| <i>razveredit'</i> | 'irritate'        | <i>razgorjačit'</i> | 'heat up, irritate' |
| <i>rasševelit'</i> | 'set into motion' |                     |                     |

|                               |                      |                                  |                      |
|-------------------------------|----------------------|----------------------------------|----------------------|
| <b>8. metaphorical excite</b> |                      |                                  |                      |
| <i>razgnevat'</i> <i>sja</i>  | 'become angry'       | <i>razgorjačit'</i> <i>sja</i>   | 'act irritated'      |
| <i>razveselit'</i>            | 'make happy'         | <i>razozlit'</i> ( <i>sja</i> )  | 'make/bec angry'     |
| <i>raspetušit'</i> <i>sja</i> | 'act excited, angry' | <i>raskajat'</i> <i>sja</i>      | 'repent'             |
| <i>rassvirepet'</i>           | 'become enraged'     | <i>rasserdit'</i> ( <i>sja</i> ) | 'make/bec angry'     |
| <i>rassečerat'</i>            | 'become angry'       | <i>rassmešit'</i>                | 'make someone laugh' |
| <i>raskipjati'</i> <i>sja</i> | 'get angry'          |                                  |                      |

**Table 2: The 89 verbs that use *raz-* for their Natural Perfective (meaning of Perfective and Imperfective are the same, Imperfective is same form minus *raz-/ras-*)**

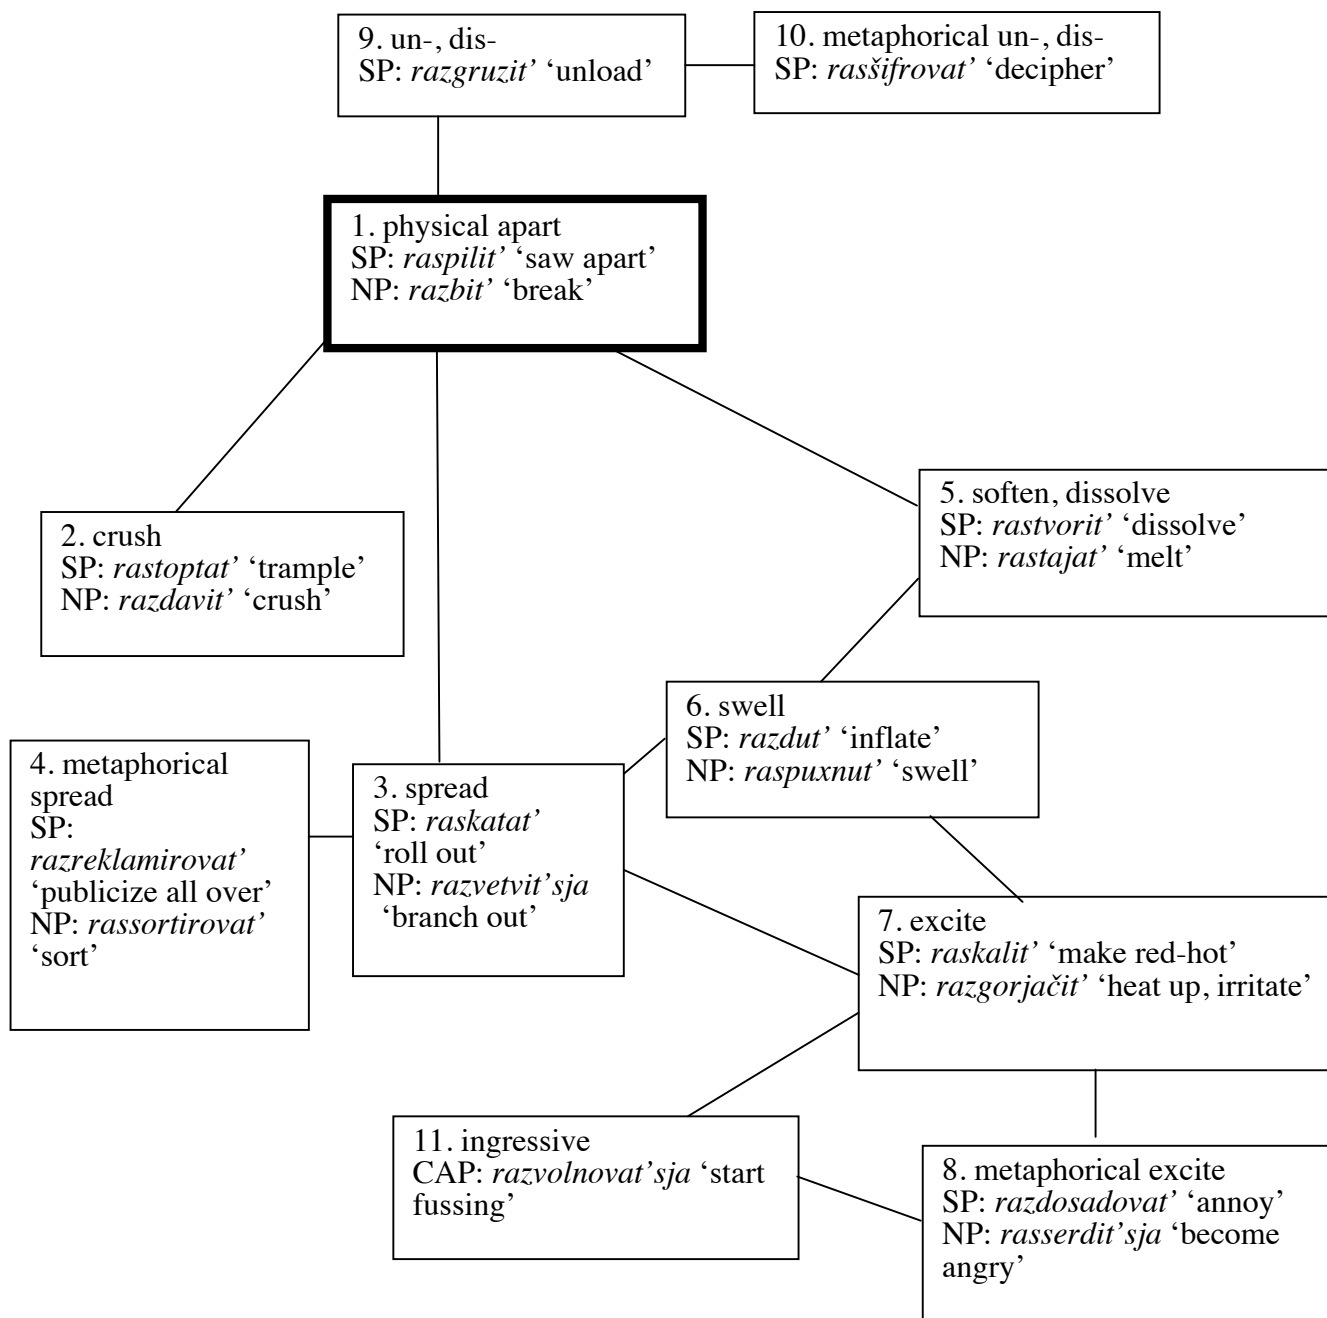

**Figure 1: Network for *raz-* (NP=Natural Perfective, SP=Specialized Perfective, CAP=Complex Act Perfective)**

Semantic Profiling: the prefixes *po-*, *s-*, *za-*, *na-*, *pro-*

- *pro-*
  - Attracted to SOUND&SPEECH (sounds that carry through space or time)
  - Neutral to IMPACT (penetration)
  - Repulsed from BEHAVIOR, CHANGE STATE
- *po-*
  - Attracted to CHANGE STATE, SOUND&SPEECH (increase along a scale, duration)
  - Neutral to IMPACT
  - Repulsed from BEHAVIOR
- *za-*

- Attracted to IMPACT, CHANGE STATE (covering, filling, fixing)
- Repulsed from BEHAVIOR, SOUND&SPEECH
- s-
  - Attracted to BEHAVIOR (semelfactive)
  - Neutral to CHANGE STATE, SOUND&SPEECH, IMPACT
- na-
  - Attracted to IMPACT, BEHAVIOR (accumulate on a surface, large quantity)
  - Neutral to SOUND&SPEECH
  - Repulsed from CHANGE STATE
- Summary of results
  - The meanings of the **verbs** with “empty” prefixes (Natural Perfectives) as classified by their semantic tags correspond to the meanings of the **prefixes** in their “non-empty” uses as previously described by scholars
  - **Conceptual overlap**: each verb selects the prefix that conforms best to the verb’s meaning

## References

- Baydimirova, Anna. 2010. *Russian aspectual prefixes O, OB and OBO : A Case Study of Allomorphy*. Master’s thesis. University of Tromsø. Tromsø. Available at <http://www.ub.uit.no/munin/handle/10037/2767>.
- Janda, L.A. 2004. “A metaphor in search of a source domain: the categories of Slavic aspect”, *Cognitive Linguistics* 15:4, 471-527.
- Janda, L.A. 2007. “Aspectual clusters of Russian verbs”, *Studies in Language* 31:3, 607-648.
- Janda, L.A. 2008. “Semantic Motivations for Aspectual Clusters of Russian Verbs”. In Christina Y. Bethin, ed. *American Contributions to the 14th International Congress of Slavists, Ohrid, September 2008*. Bloomington, IN: Slavica Publishers. pp. 181-196.
- Janda, L.A. Forthcoming. “Prefixed Perfectives from Non-Determined Motion Verbs in Russian”, in *Slavic verbs of motion*, edited by Viktoria Driagina-Hasko and Renee Perelmutter, John Benjamins.
- Janda, L.A. and J.J. Korba. 2008. “Beyond the pair: Aspectual clusters for learners of Russian”. *Slavic and East European Journal* 52:2, 254-270.
- Janda, L.A., A. Baydimirova, J. Kuznetsova, O. Lyashevskaya, A. Makarova, T. Nessel, S. Sokolova. Forthcoming. “Russian ‘purely aspectual’ prefixes: Not so ‘empty’ after all?”, *Scando-Slavica*.
- Janda, L.A. and T. Nessel. 2010. “Taking Apart Russian RAZ-”. *Slavic and East European Journal* 54:3, 476-501.
- Janda, L.A. and O. Lyashevskaya. forthcoming. “Grammatical profiles and the interaction of the lexicon with aspect, tense and mood in Russian”. *Cognitive Linguistics*.
- Krongauz, M. A. 1998. *Pristavki i glagoly v russkom jazyke: semantičeskaja grammatika*. Moscow: Jazyki russkoj kul’tury.
- Langacker, Ronald W. 2008. *Cognitive Grammar: A Basic Introduction*. Oxford: Oxford University Press.
- Lyashevskaya, O. and L.A. Janda. In preparation b. “Semantic profiles of five Russian prefixes: po-, s-, za-, na-, pro-”.
- Nessel, T. L.A. Janda, A. Baydimirova. forthcoming. “Two ways to get out: Radial Category Profiling and the Russian Prefixes vy- and iz-”. *Zeitschrift für Slawistik*.
- Ramchand, G. 2004. “Time and the event: The semantics of Russian prefixes”. *Nordlyd* 32.2, 323-361.
- Roberts, C. B. 1976. “Lexical differentiation of the Russian prefixal allomorphs o-, ob-, obo-”. *Zeitschrift für Phonetik, Sprachwissenschaft und Kommunikationsforschung* 29, 64-76.
- Roberts, C. B. 1981. “The origins and development of o(b)- prefixed verbs in Russian with the general meaning ‘deceive’”. *Russian Linguistics* 5, 217-233.
- Sokolova, S., O. Lyashevskaya and L.A. Janda. In progress. “Constructional profiles and the so-called ‘empty’ prefixes in Russian: A case study of the verb *gruzit*”.

- Svenonius, P. 2004a. "Slavic prefixes and morphology: An introduction to the *Nordlyd* volume". *Nordlyd* 32.2, 177-204.
- Svenonius, P. 2004b. "Slavic prefixes inside and outside VP". *Nordlyd* 32.2, 205-253.
- Svenonius, P. Forthcoming. "Russian prefixes are phrasal". *Proceedings of FDSL* 5.
- Timberlake, A. 2004. *A Reference grammar of Russian*. Cambridge: Cambridge U Press.
- Tixonov, A. N. 1998. *Russkij glagol*. Moscow: Russkij jazyk.
- Zaliznjak, A. A. and A. D. Šmelev. 2000. *Vvedenie v russkuju aspektologiju*. Moscow: Jazyki russkoj kul'tury.
