# Supplementary material
Source: publisher figshare collection journal article supplement (https://brill.figshare.com/articles/dataset/_/7092860)
Supplement: Supplementary file 1 [file 1 › Janda 2. Conceptual overlap.ppt.pdf]

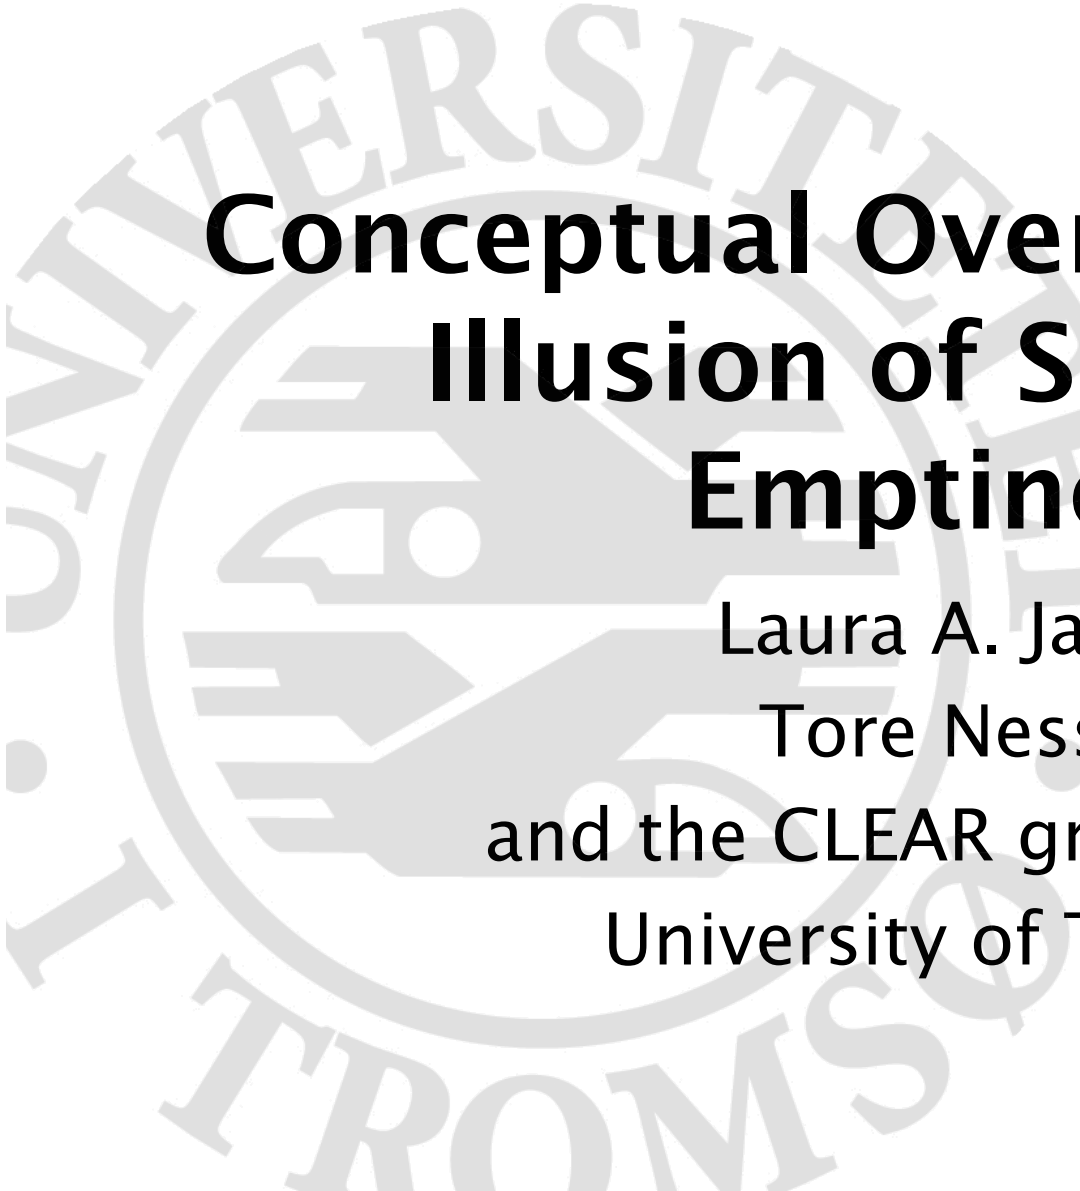A large, light gray watermark of the University of Tromsø seal is visible in the background. The seal is circular and contains the text 'UNIVERSITETET I TROMSØ' around the perimeter. In the center, there is a stylized illustration of a ship or vessel.

# **Conceptual Overlap and the Illusion of Semantic Emptiness**

Laura A. Janda

Tore Nessel

and the CLEAR group at the  
University of Tromsø

# Who is CLEAR?

- Laura A. Janda, Tore Nessel
- Olga Lyashevskaya
- Svetlana Sokolova
- Julia Kuznetsova
- Anna Baydimirova
- Anastasia Makarova

CLEAR:  
Cognitive Linguistics:  
Empirical Approaches  
to Russian

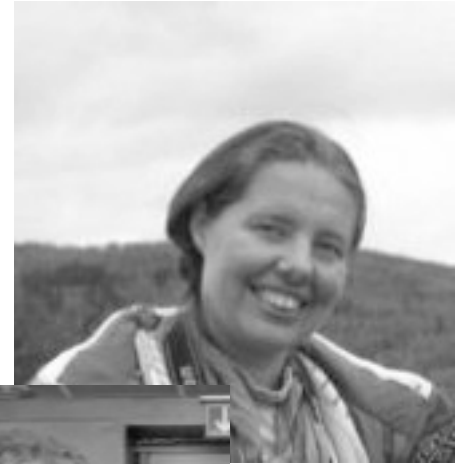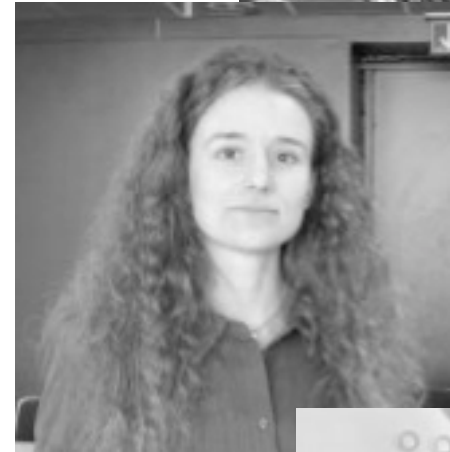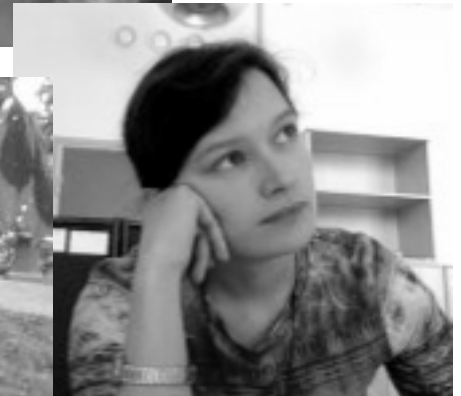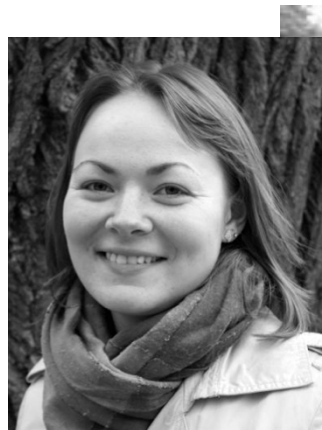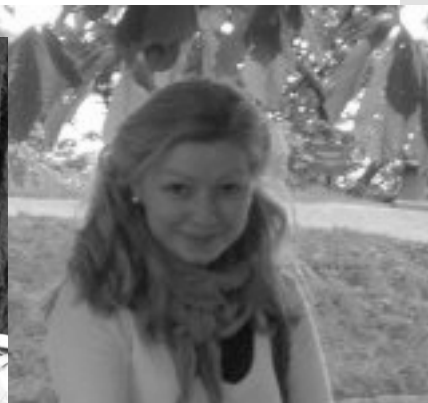

# Why use quantitative approaches in cognitive linguistics?

- Usage-based approaches:
  - Language system and language use are not separate:
  - Generalizations grow out of language use
  - Linguists must study actual language use
- Categorization:
  - Not all categories have clear-cut boundaries
  - Gradient phenomena are acknowledged
- The information revolution:
  - Large electronic corpora available
  - Tools for handling large amounts of data needed

Cognitive linguistics needs statistical methods.

# Pioneers: Collostructional analysis

- Which words fit into a construction?
- Example: NP *waiting to happen*
- Whether a word fits is a matter of degree of (repulsion or attraction)
  - E.g. *disaster*, *accident* are attracted to the construction
- Stefanowitsch and Gries (2003, 2004 etc.) developed statistical methods for the analysis of repulsion and attraction
- Objective description of a word's relationship to a construction

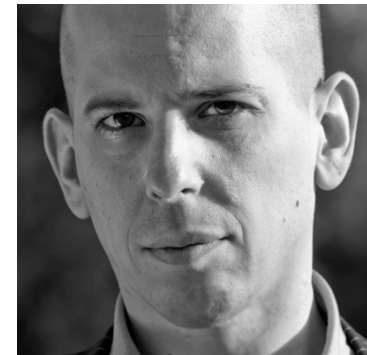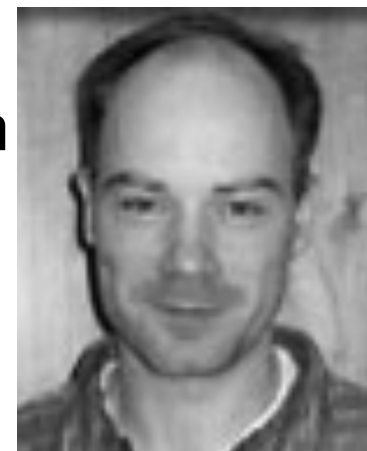

# Behavioral profiles

- Are near synonyms really different?
- Divjak & Gries studied 1585 sentences with 9 verbs of trying in Russian
- Each sentence tagged manually for 87 variables (aspect, clause structure ...)
- Each verb receives percentage for each variable
- Each verb has a “behavioral profile” defined by its values for the variables
- Behavioral profiles can be analyzed statistically
- Objective description of differences and similarities among near synonyms

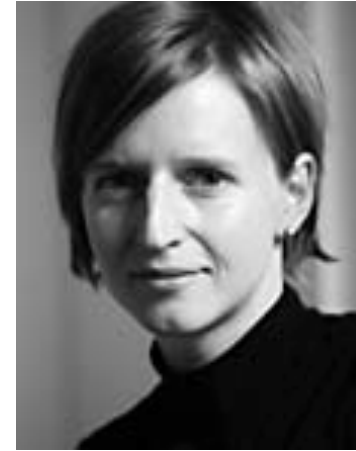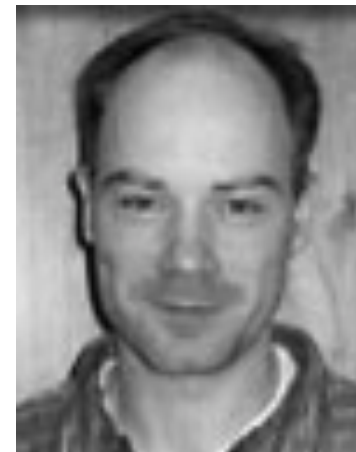

# Constructional profiles

- Janda & Solovyev (2008) studied
  - Nouns for sadness/happiness in Russian (near synonyms)
  - 70 constructions: (Prep) + Noun<sub>CASE</sub>
- Constructional profile:
  - “The distribution of relative frequencies of constructions associated with a given word”
- Constructional profiles can be compared by means of statistical analysis
- Objective description of syntactic similarities and differences between near synonyms

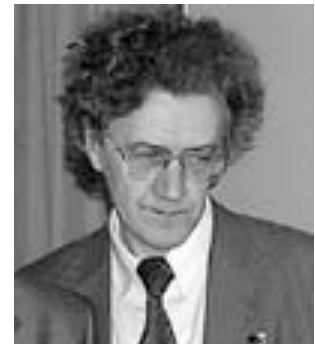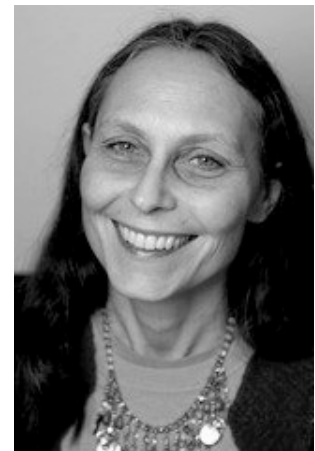

# Grammatical profiles

- Janda & Lyashevskaya (to appear) study token frequencies of inflected forms of Russian verbs (nearly 6 millions)
- Verbs show remarkably different behavior
- Grammatical profile:
  - “Relative frequency distribution of the inflected forms of a word in a corpus”
- Grammatical profiles can be compared by means of statistical analysis
- Grammatical profiles shed light on the nature of aspectual pairs in Russian

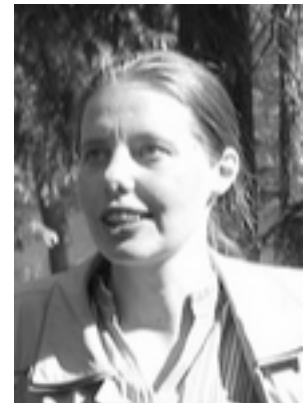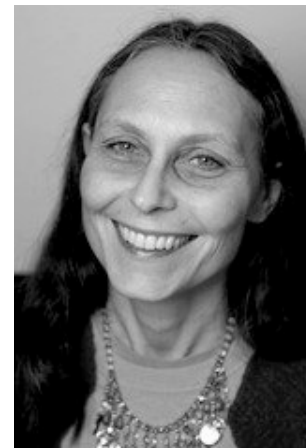

# Radial Category Profiling

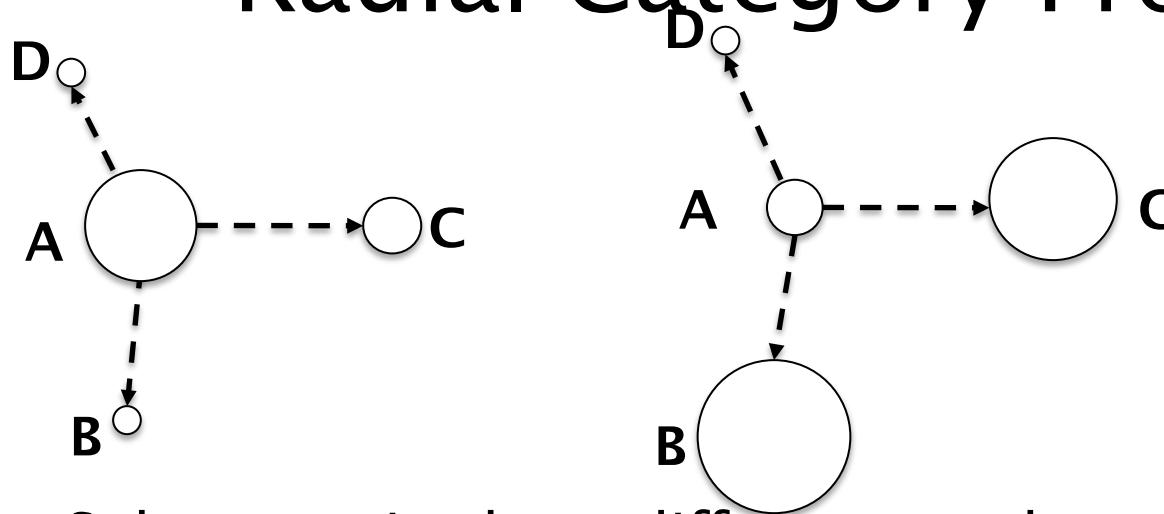

- Subcategories have different numbers of members (type frequencies)
- Radial Category Profile: The relative frequency distribution of the subcategories of a radial category
- Profiles of different categories can be compared with simple statistical methods
- Case study: Janda, Nessel & Baydimirova (in press)

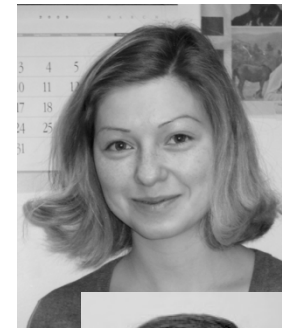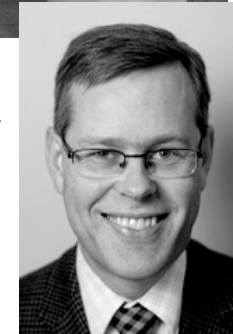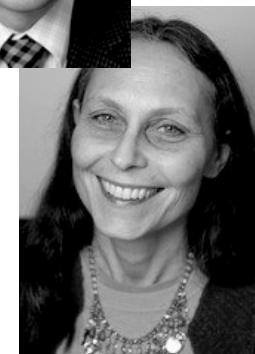

# Semantic profiles

- Janda & Lyashevskaya (to appear) study attraction and repulsion between
  - Russian aspectual prefixes and
  - Semantic classes of verbs (tagged in the Russian National Corpus)
- Prefixes show remarkably different behavior
- Semantic profile of a prefix:
  - Relative frequency distribution of the semantic classes of verbs in a corpus that combine with a prefix
- Semantic profiles can be compared by means of statistical analysis



# Conceptual Overlap

- Is a linguistic unit ever semantically “empty”?
- If a linguistic unit, like a prefix, never appears in isolation, it can be hard to say what its meaning is
- Though some claim that such bound morphemes are “empty”, they may instead show **conceptual overlap**
- Methods for exploring meaning in situations of conceptual overlap:
  - **Radial Category Profiling**
  - **Semantic Profiling**

# Conceptual Overlap

- “Redundancy is not to be disparaged, for in one way or another every language makes extensive use of it” (Langacker 2008, 188)
- Conceptual overlap is found in common collocations such as *added bonus* and *physical exercise*
- Hypothesis: The meaning of a bound morpheme and the lexical morphemes it attaches to show conceptual overlap

# Are Russian prefixes empty?

- Conventional wisdom:
  - Purely aspectual prefixes are semantically “empty”
- Our alternative Hypothesis:
  - Conceptual overlap
- How can this be tested empirically?
  - **Radial Category and Semantic Profiling:**
    - Corpus data
    - Statistical analysis

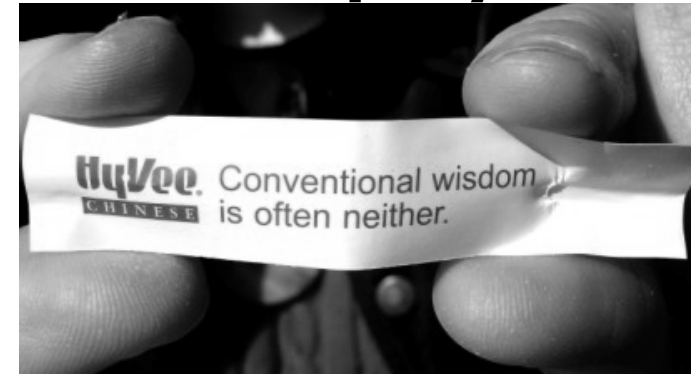

# Overview

- General arguments why prefixes aren't empty
  - Number and distribution of prefixes
  - Borrowings
  - Prefix variation
- Case study of the *raz-* prefix
  - Used in some types of perfectives with spatial meaning
  - Claimed to be “empty”
- Remaining prefixes and methodology
  - **Radial Category Profiling** for “small prefixes”
  - **Semantic Profiling** for “big” prefixes

# RAZojtis' 'walk in different directions'

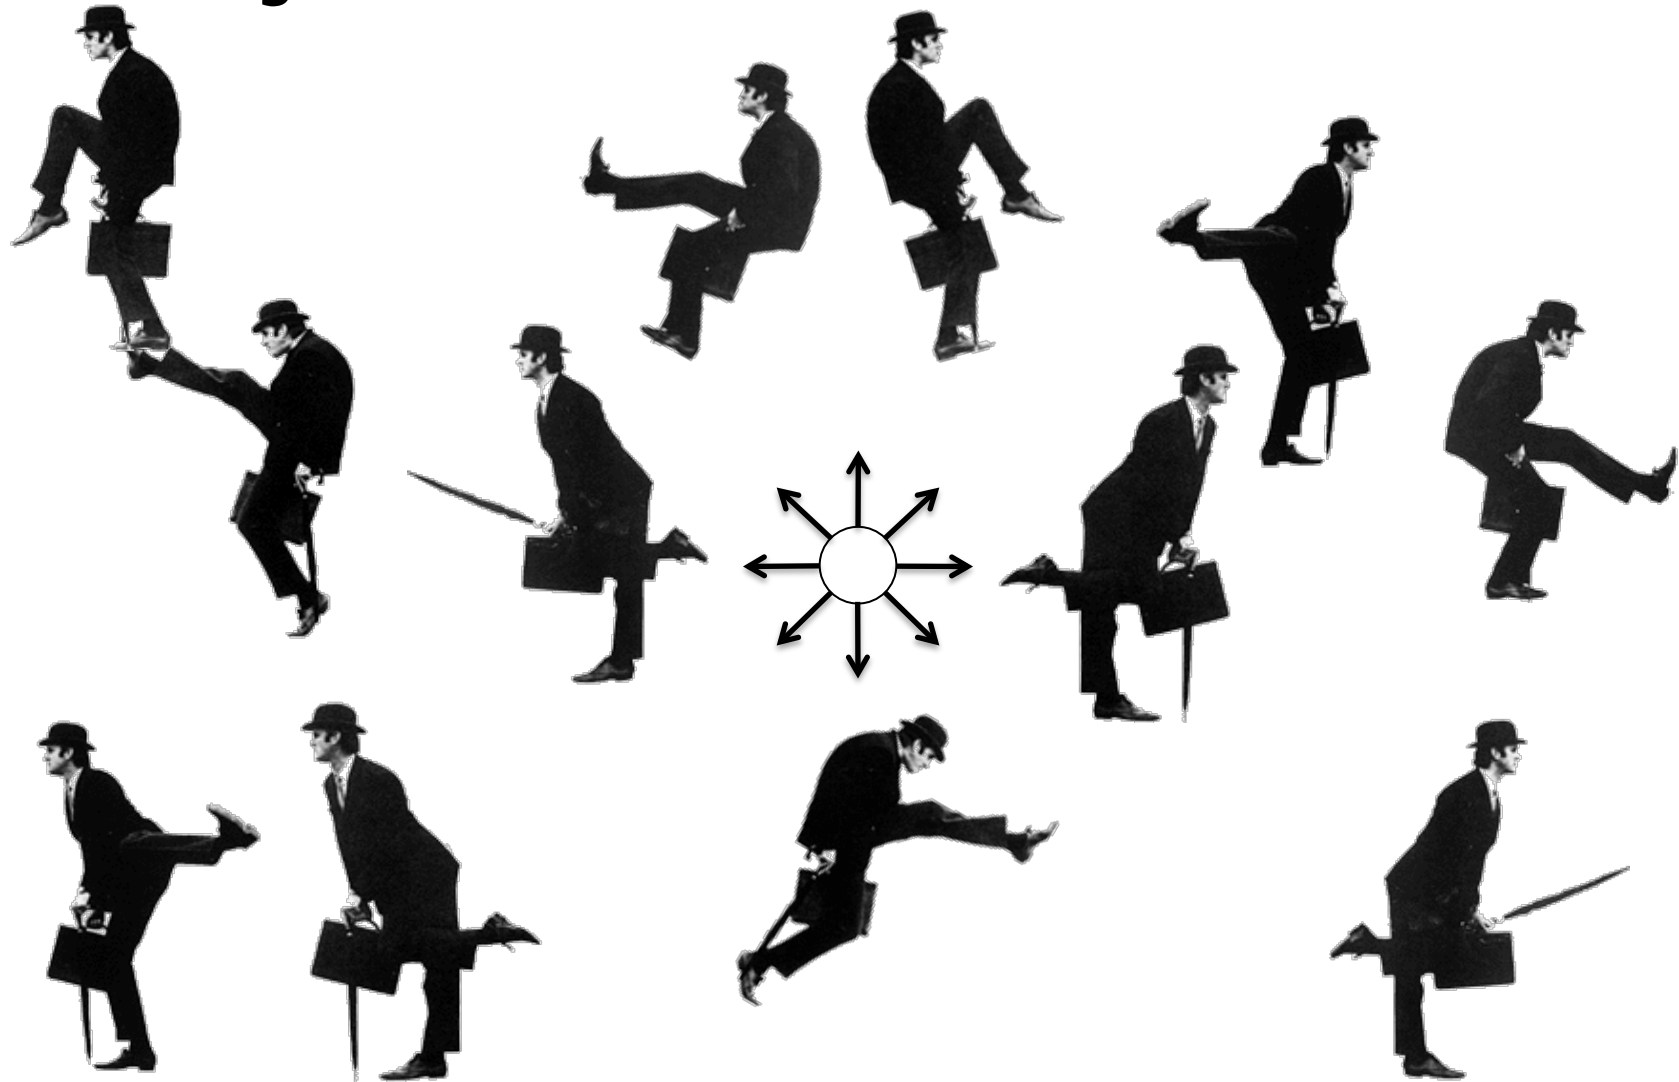

*John Cleese in the Monty Python sketch "Ministry of silly walks"*

# Russian aspectual prefixation

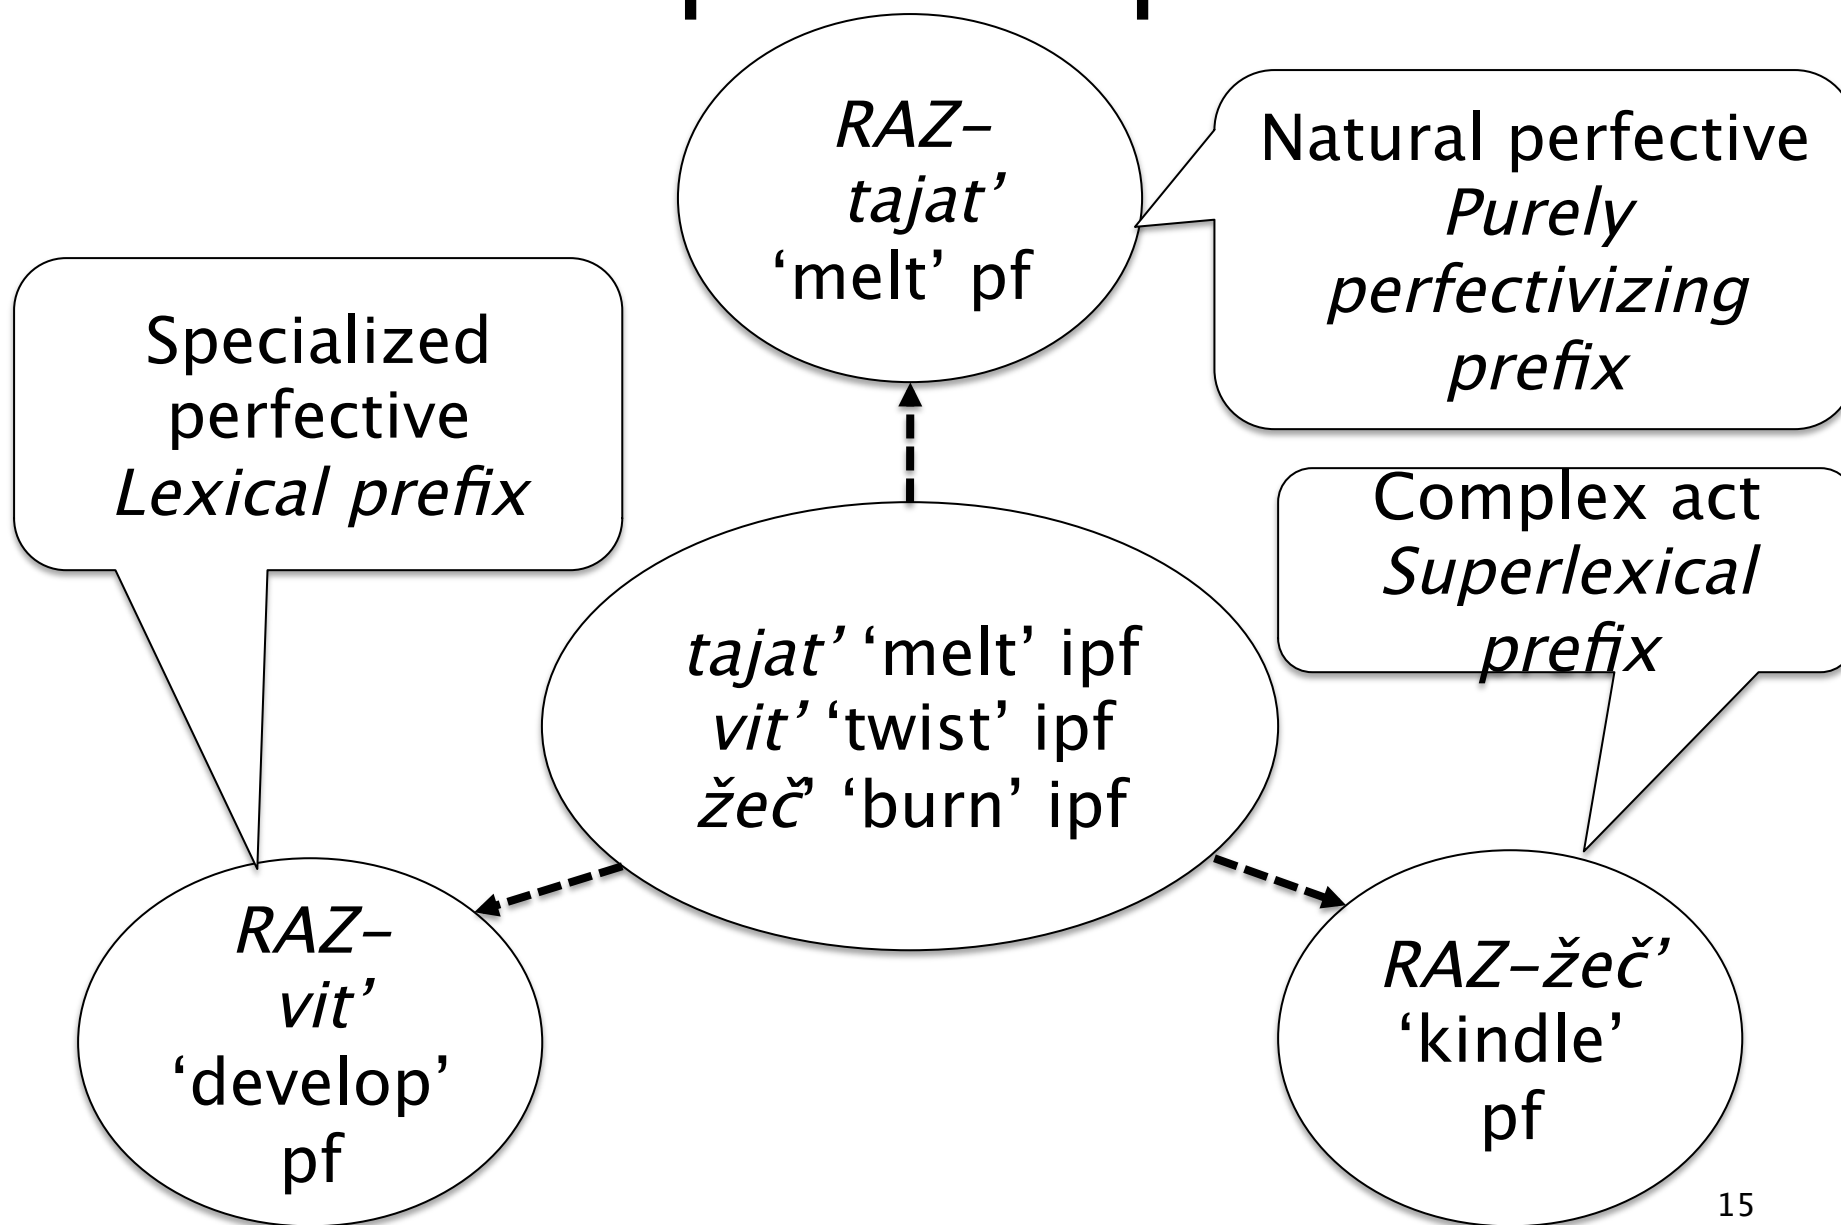

# Russian aspectual prefixation

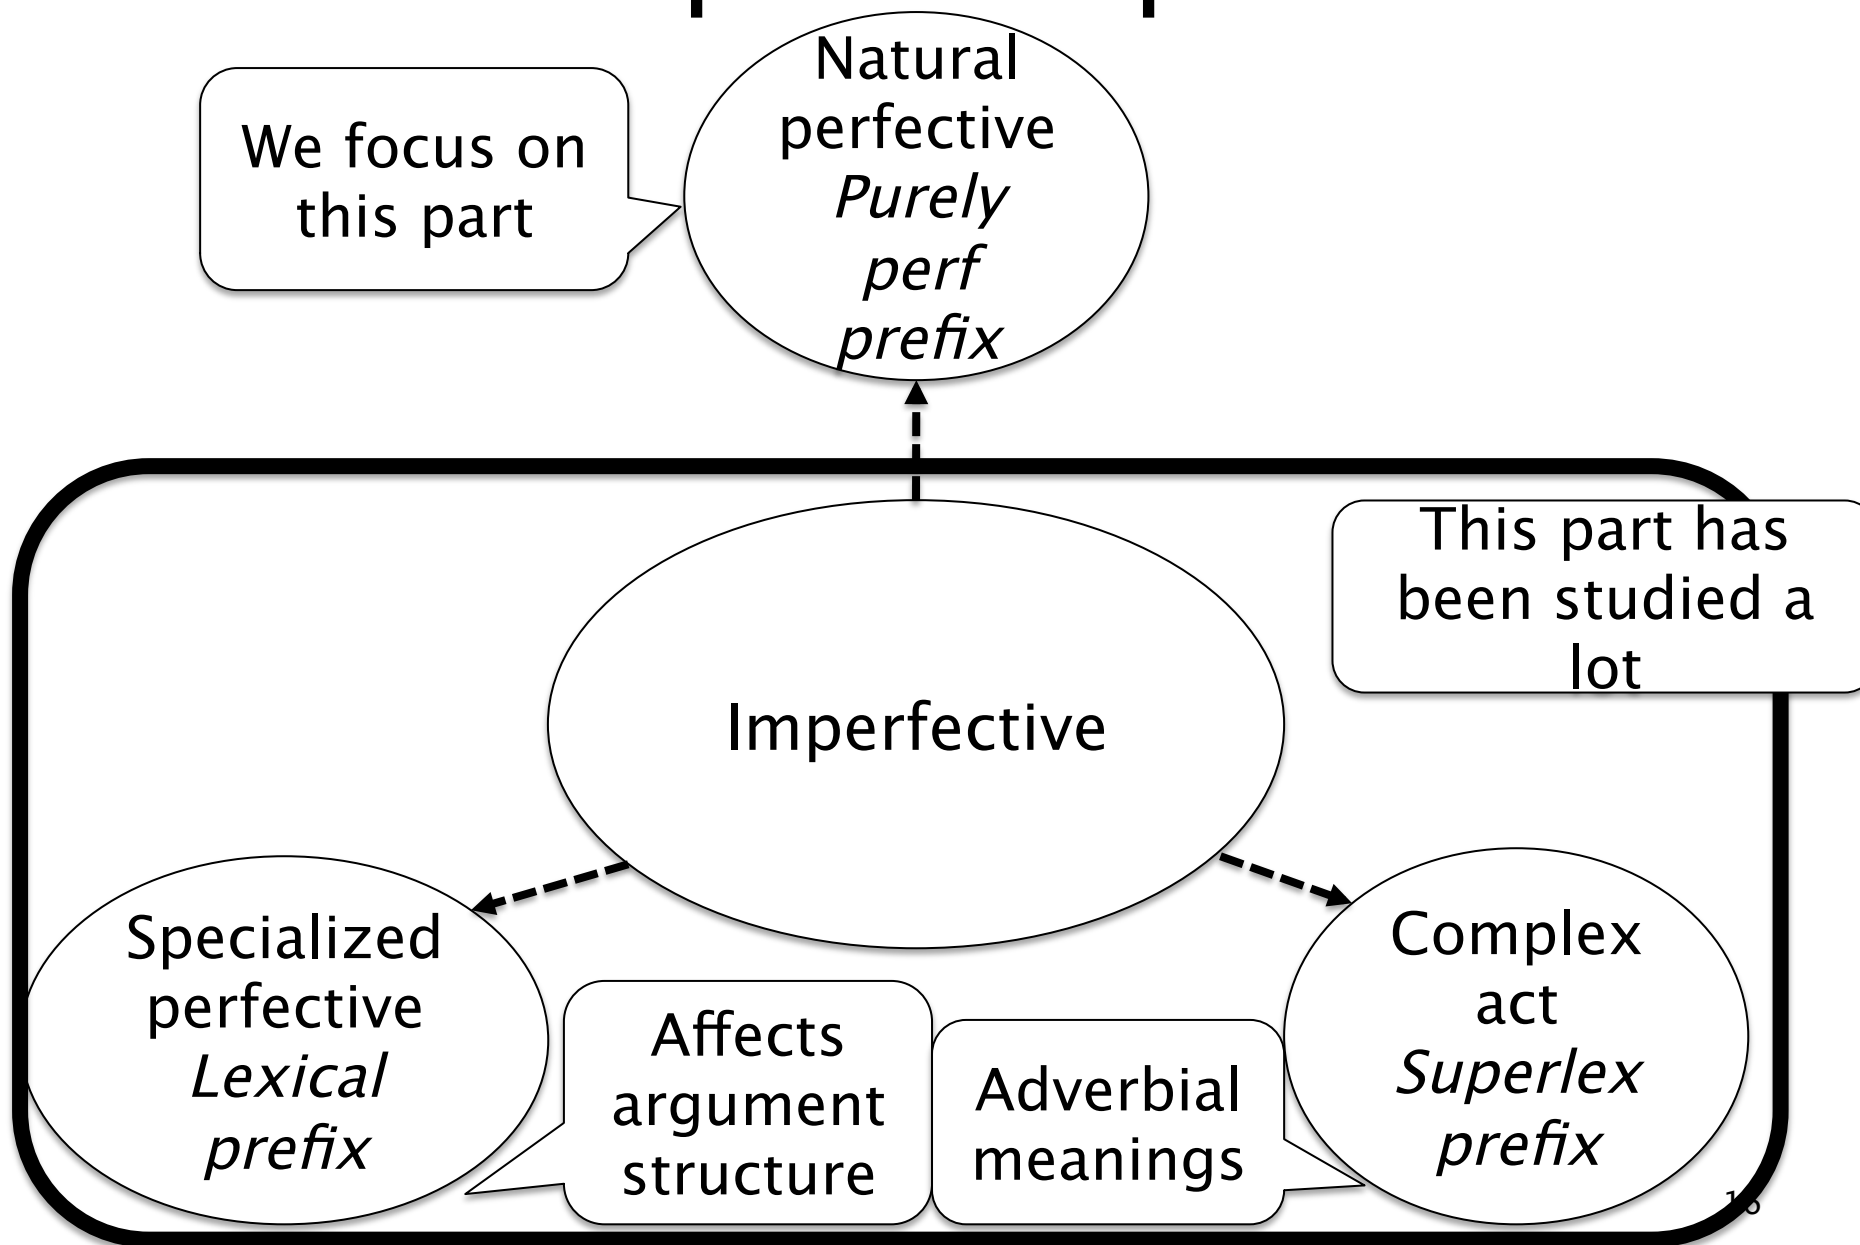

# Why purely perfectivizing prefixes aren't empty (1)

- Assume:
  - Only purpose of prefixes is to mark perfective aspect
- How many prefixes are needed?
  - Reasonable answer: ONE
- Russian has 19 relevant prefixes (Krongauz 1998)

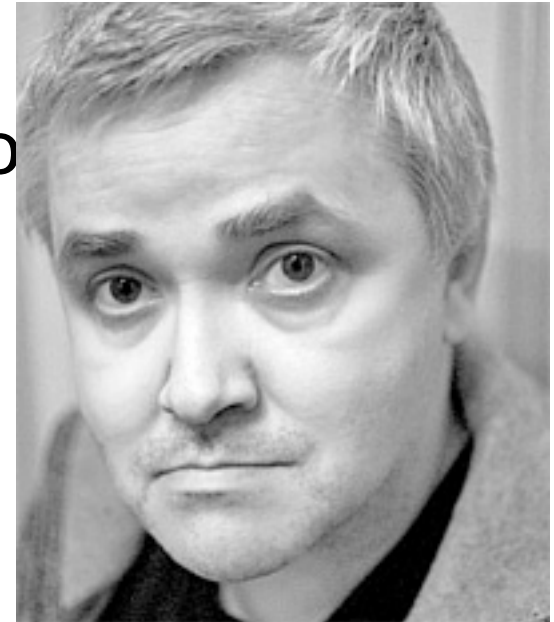

M.A. Krongauz

The number of prefixes suggests that they are not pure markers of aspect.

# Why purely perfectivizing prefixes aren't empty (2)

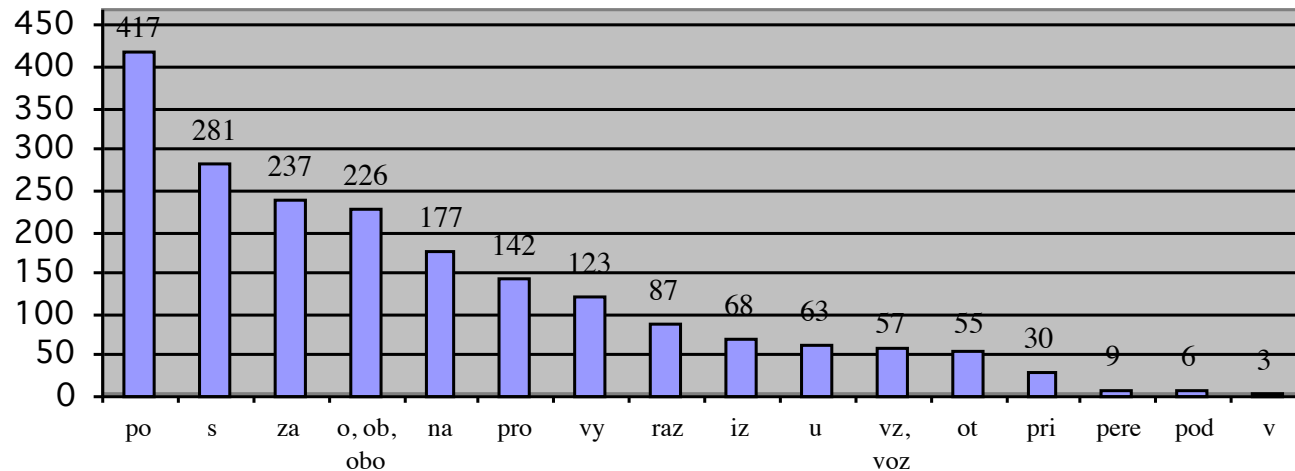

- Assume
  - Prefixes are pure aspectual markers
- Prediction
  - Even distribution of prefixes across base verbs

The UNeven distribution suggests that the prefixes do different jobs.

# Why purely perfectivizing prefixes aren't empty (3)

- Assume
  - Prefixes are pure aspectual markers
- Prediction
  - Prefixes are assigned to borrowings in random fashion
- But
  - Native speakers have intuitions
  - Borrowings are assigned prefixes in a consistent way.

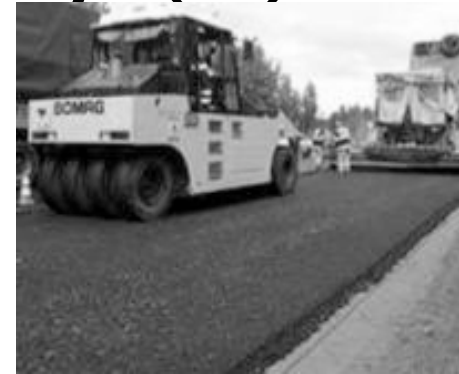

*ZA-asfal'tirovat'* COVER

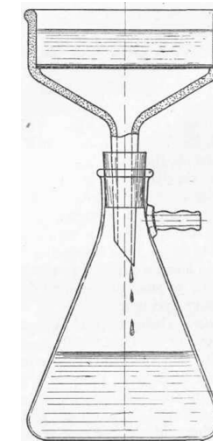

*PRO-fil'trovat'*  
MOVE  
THROUGH

The consistent assignment of prefixes to borrowings suggests that prefixes are not semantically empty.

# Structure of the argument

1. Explore meaning of *raz-* in verbs where its meaning is UNcontroversial:
  - Specialized perfectives (lexical prefixes)
  - Complex act perfectives (superlexical prefixes)
2. Compare with the use of *raz-* in verbs where its meaning is controversial:
  - Natural perfectives (purely aspectual prefixes)
3. The same meaning attested in (1) and (2).
4. *Raz-* has the same meaning in all types of perfectives.
5. There is no semantically empty *raz-* in Russian.

# Meaning: A network model

- Category:
  - Network of related subcategories
- Prototype:
  - Central subcategory that is the best example of the category as a whole
- Extension relations:
  - Subcategories relate to the prototype via e.g. metaphor and metonymy.
- Schema:
  - Categories may have a general schema that covers all subcategories.

# General schema and prototype for *raz-*

- “APART”:
  - Outward movement in various directions from a point

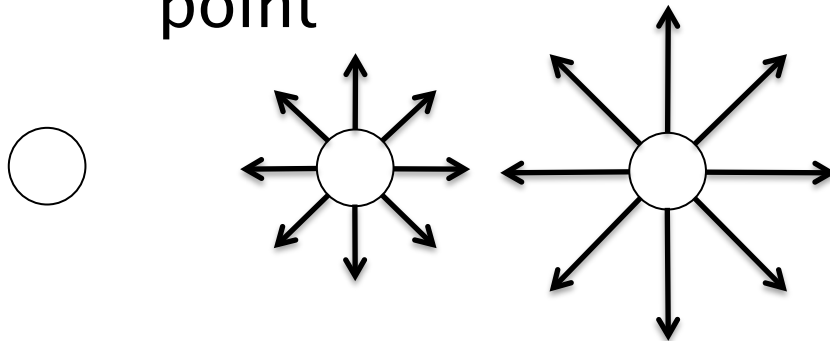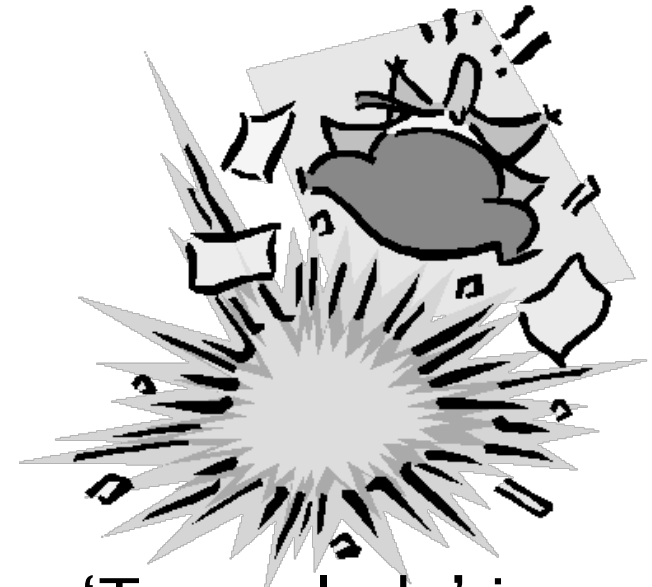

‘To explode’ is  
*RAZorvat’sja*

- The general schema is instantiated in a variety of subcategories
- Prototype = “PHYSICAL APART”
  - Physical object divided in pieces

# Specialized/complex act perfectives

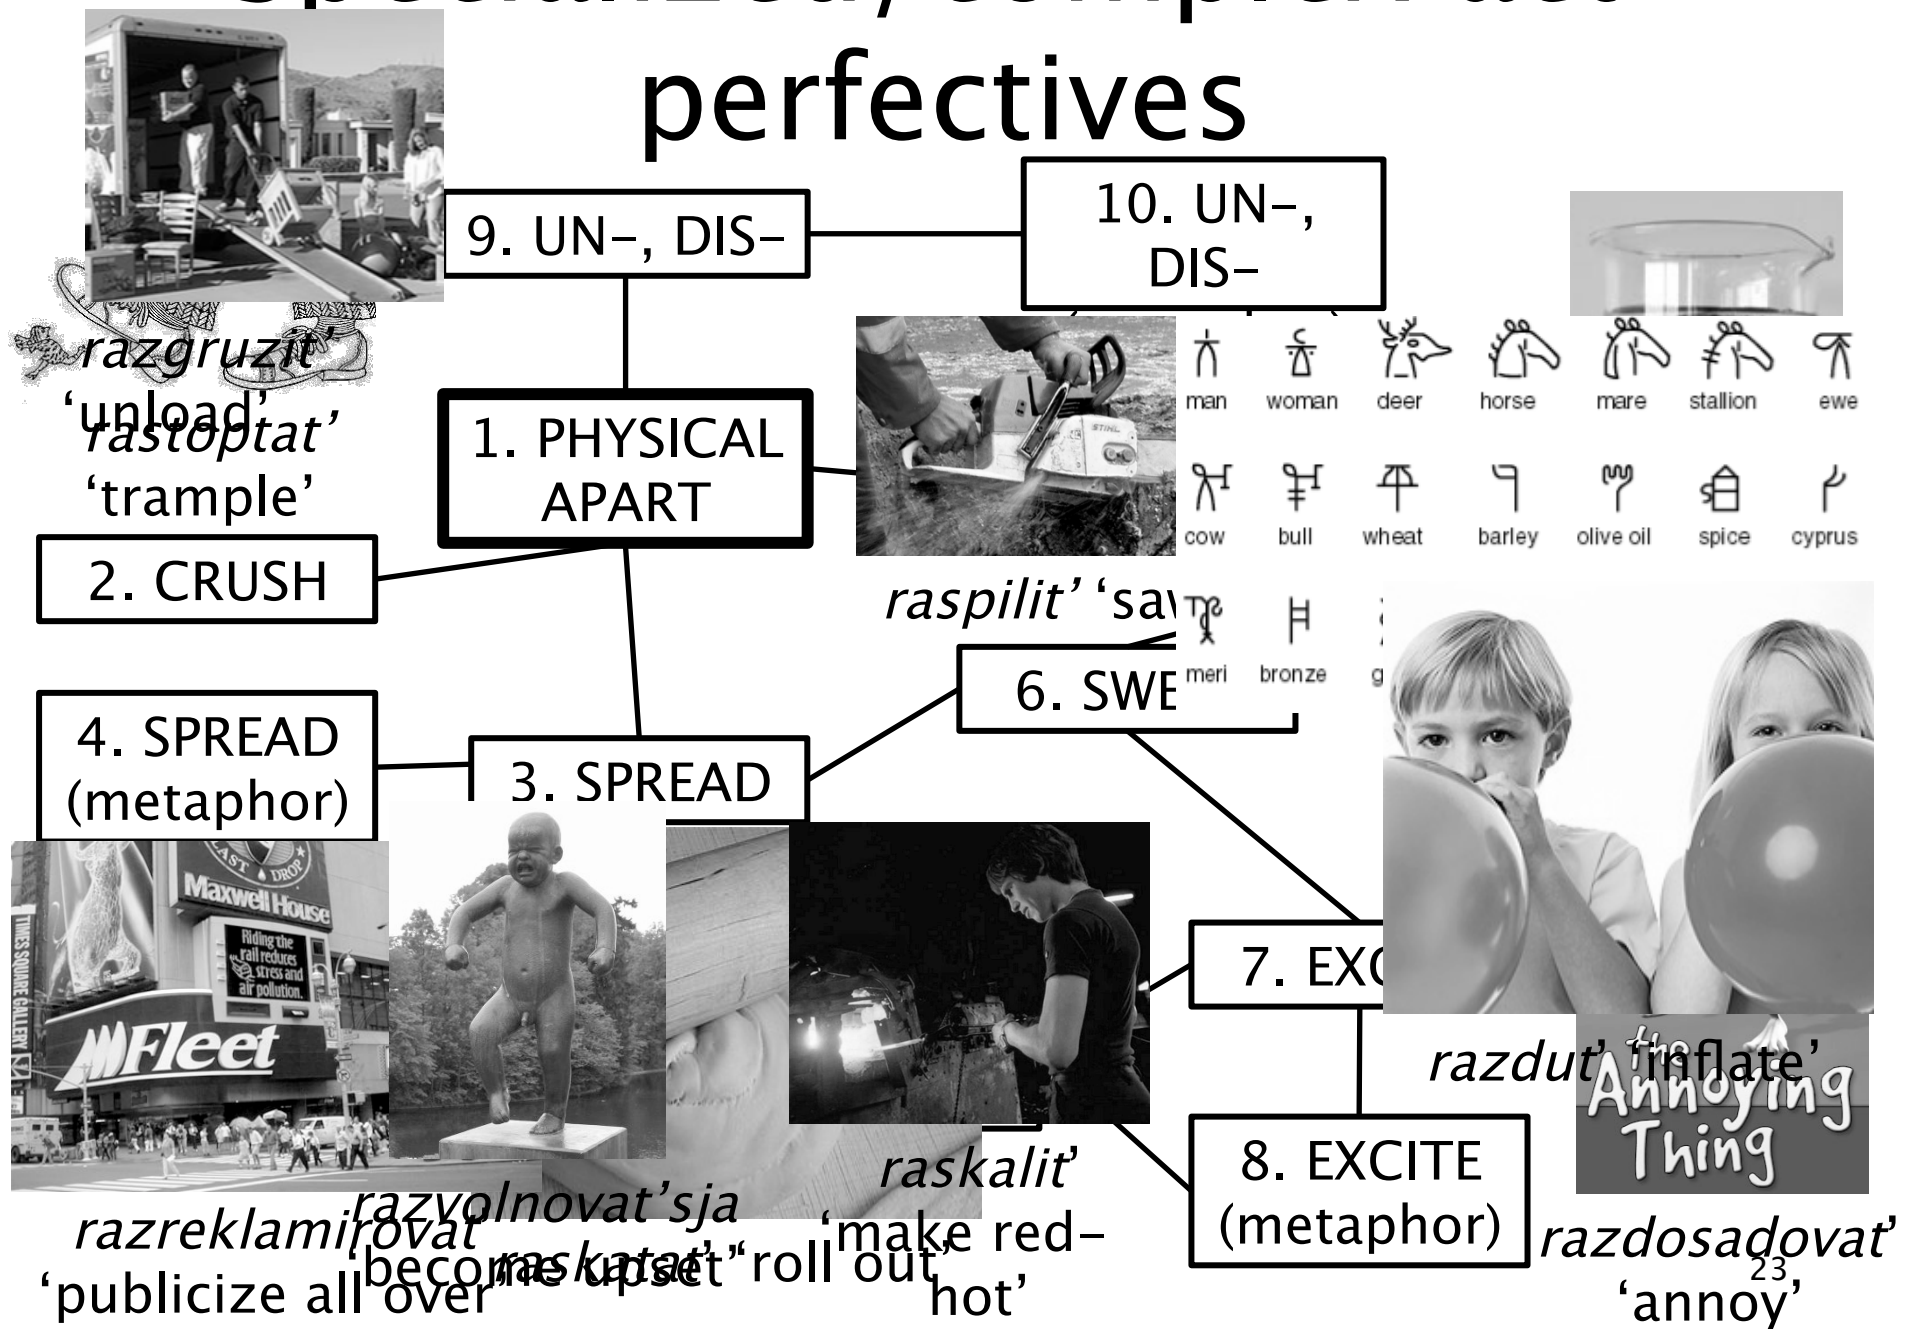

# Natural perfectives

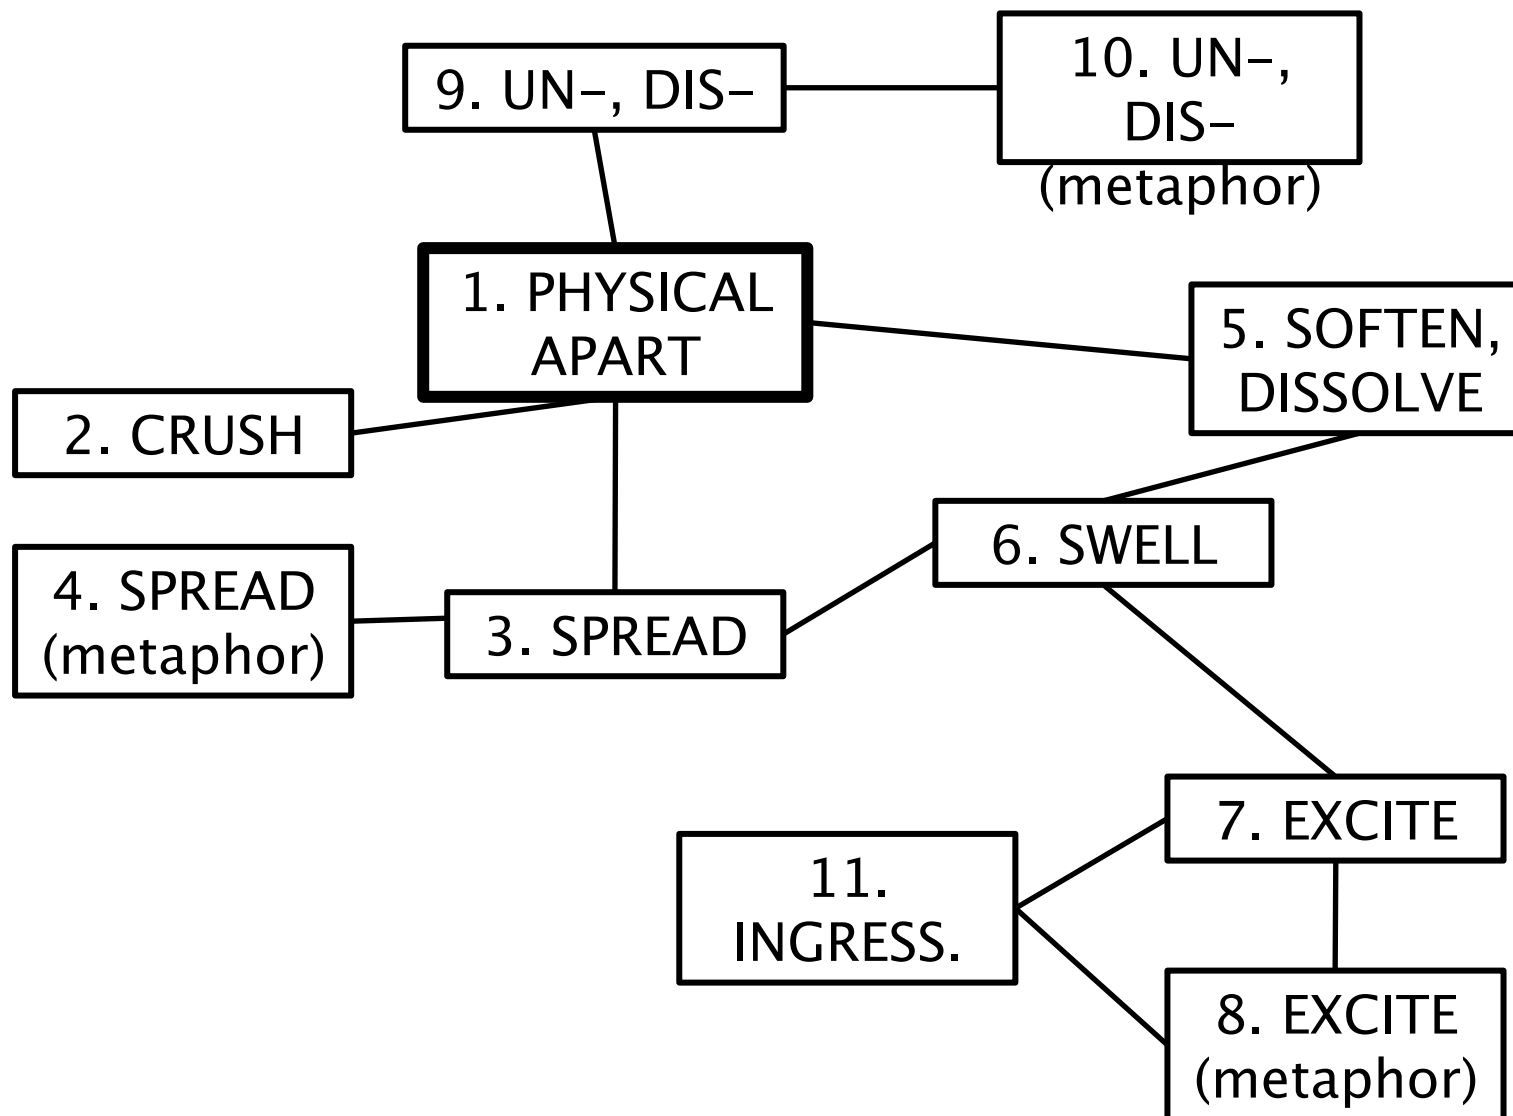

Only in  
specialized  
perfectives

# Natural perfectives

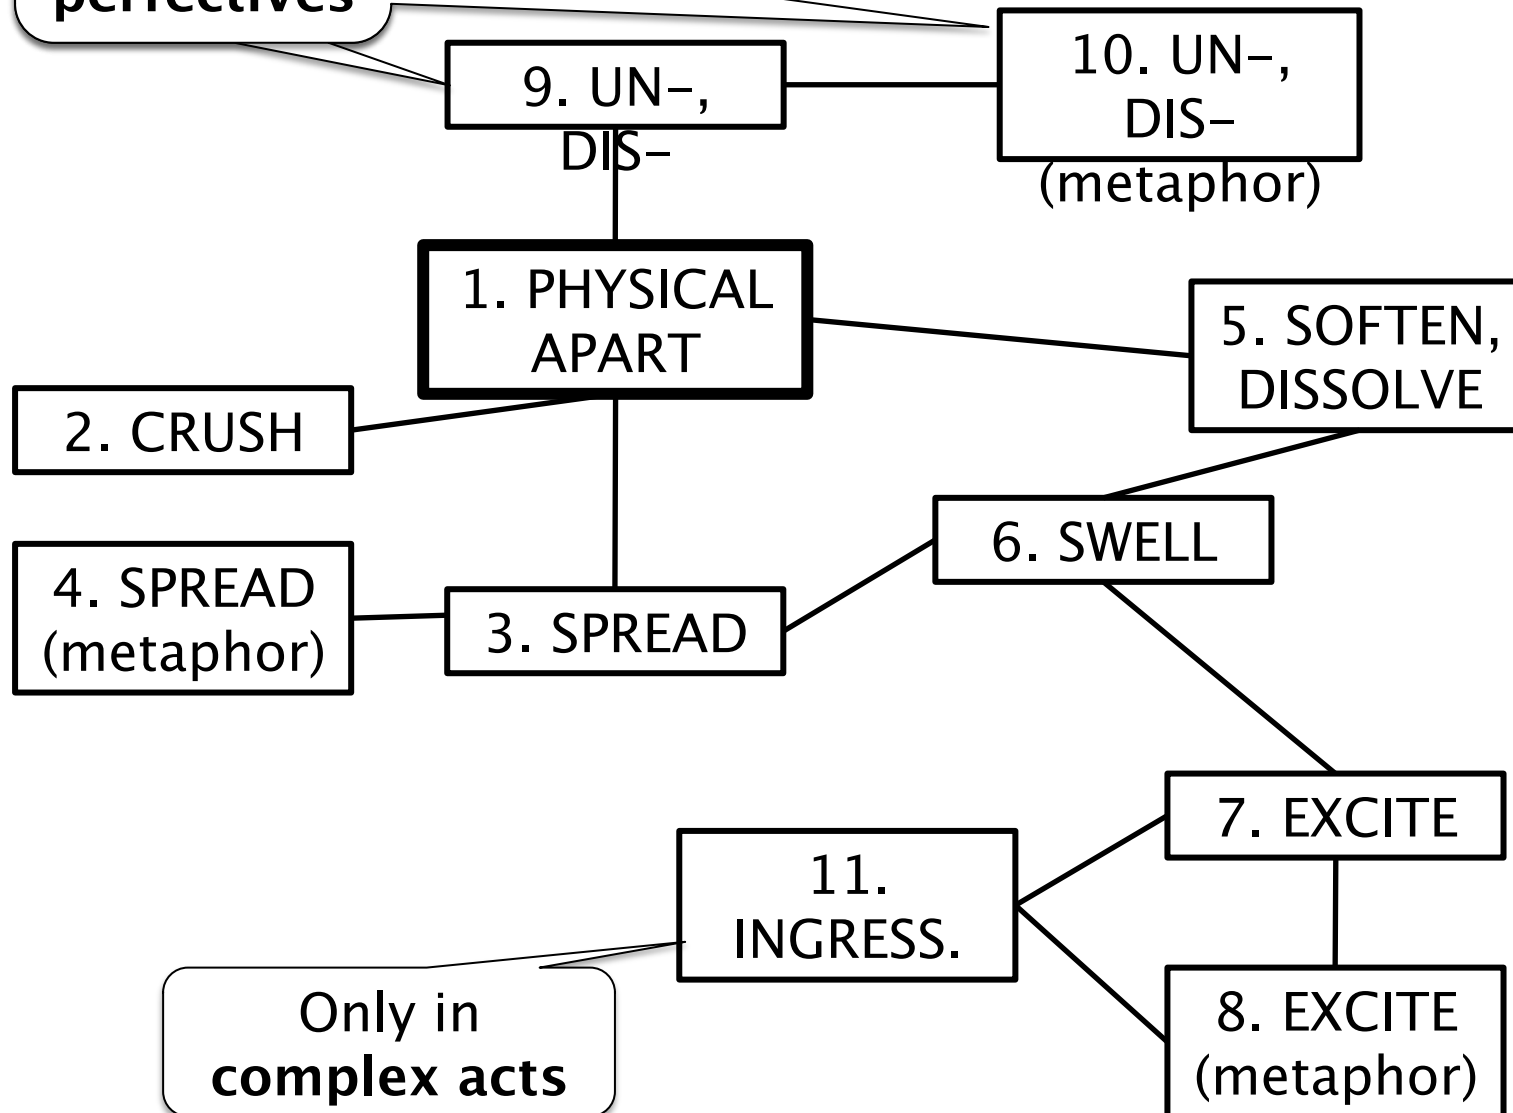

# Semantic overlap and the illusion of emptiness

## Specialized perfectives & complex acts

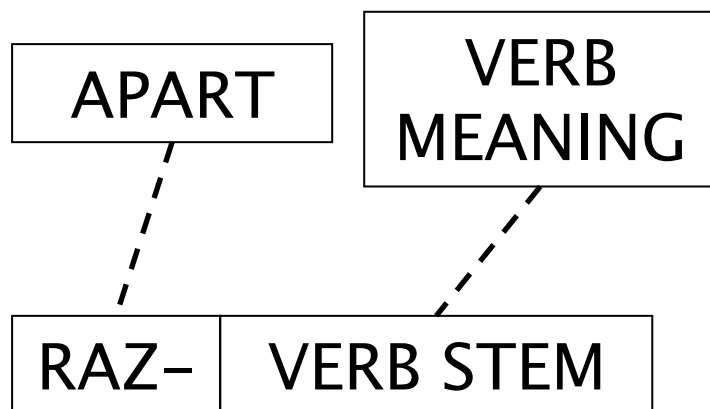

- Prefix and verb have **different** meanings
- The meaning of the prefix stands out

## Natural perfectives:

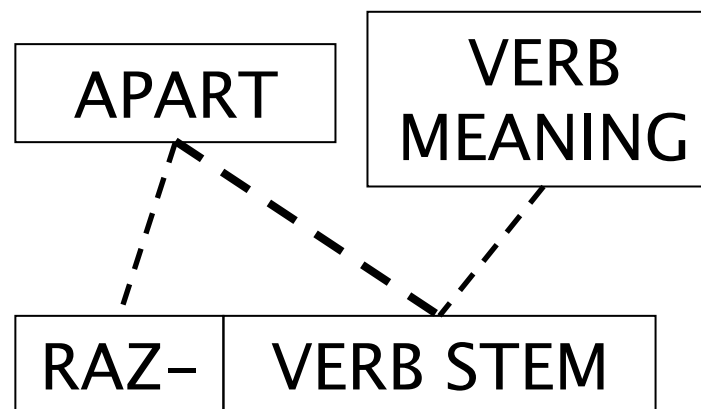

- Prefix and verb have **overlapping** meanings
- The meaning of the prefix is “invisible”
- An illusion of semantic emptiness is created

# Radial Category Profiling

- A method for comparing meanings
  - Radial category for Specialized & Complex Act Perfectives
  - Radial category for Natural Perfectives
  - We see that the base verbs of the Natural Perfectives have the **same range** of meanings as posited for the prefixes in Specialized & Complex Act Perfectives
  - Radial Category Profiling reveals conceptual overlap between verbs and prefixes

# Further use of Radial Category Profiling

- The “small” prefixes (entire CLEAR group)
  - *u-*, *ot-*, *pri-*, *v-*, *raz-*, *vz-/voz-*, *vy-*, *iz-*, *pere-*, and *pod-* (over 1300 verbs analyzed)
  - For all 10, the two radial categories coincide
    - 3 have 100% overlap, 5 majority overlap, 3 minority (contiguous) overlap
    - Meanings not among NPs are phasal, annulment, quantitative comparison, repetition
- Related prefixes: *vy-*, *iz-*; *o-/ob-/obo-*

# Semantic Profiles

- The “big” prefixes: *po-*, *s-*, *za-*, *na-*, *pro-*
  - Thousands of verbs and diffuse meanings make Radial Category Profiling problematic
  - Analysis of semantic tags assigned to verbs in Russian National Corpus
    - Moscow semantic school
    - independent, objective measure
    - focused on these tags: IMPACT, CHANGE STATE, BEHAVIOR, SOUND&SPEECH
  - 382 verbs analyzed (all existing NPs with these prefixes, single prefix and single tag)

# Semantic Profiles: Results

- **Each prefix does have a unique semantic profile**
- Chi-square analysis shows that there are significant differences (chi-square = 248, df = 12,  $p = 2.2e-16$ , effect size, Cramer's  $V = 0.81$ )
- Additional calculation of Expected Values and Fisher Test determine which semantic tags each prefix is attracted to and repulsed from

# Semantic Profiles

- *pro*–
  - Attracted to SOUND&SPEECH (sounds that carry through space or time)
  - Neutral to IMPACT (penetration)
  - Repulsed from BEHAVIOR, CHANGE STATE
- *po*–
  - Attracted to CHANGE STATE, SOUND&SPEECH (increase along a scale, duration)
  - Neutral to IMPACT
  - Repulsed from BEHAVIOR

# Semantic Profiles

- *za*–
  - Attracted to IMPACT, CHANGE STATE (covering, filling, fixing)
  - Repulsed from BEHAVIOR, SOUND&SPEECH
- *s*–
  - Attracted to BEHAVIOR (semelfactive)
  - Neutral to CHANGE STATE, SOUND&SPEECH, IMPACT

# Semantic Profiles

- *na*–
  - Attracted to IMPACT, BEHAVIOR (accumulate on a surface, large quantity)
  - Neutral to SOUND&SPEECH
  - Repulsed from CHANGE STATE

# Semantic Profiles

- Summary of results
  - The meanings of the **verbs** with “empty” prefixes (Natural Perfectives) as classified by their semantic tags correspond to the meanings of the **prefixes** in their “non-empty” uses as previously described by scholars
  - **Conceptual overlap**: each verb selects the prefix that conforms best to the verb’s meaning
