# Supplementary material
Source: publisher figshare collection journal article supplement (https://brill.figshare.com/articles/dataset/_/7092860)
Supplement: Supplementary file 1 [file 1 › Janda 3. Metaphor in grammar.ppt.pdf]

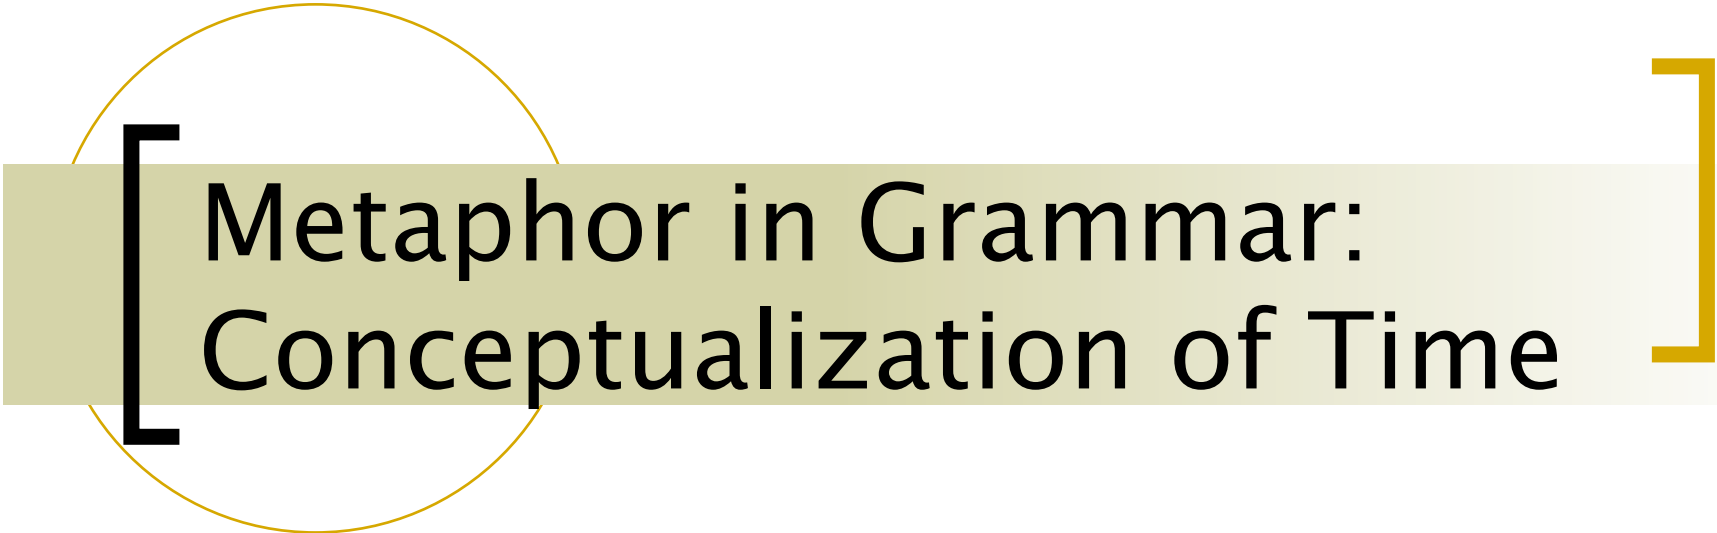

# Metaphor in Grammar: Conceptualization of Time

Laura A. Janda  
University of Tromsø

# [Overview]

---

- Matter provides the source domain for the metaphor that motivates aspect in Russian
- PERFECTIVE IS A DISCRETE SOLID OBJECT vs. IMPERFECTIVE IS A FLUID SUBSTANCE
- Correlation between aspectual distinctions and count/mass, number distinctions

# [Slavic Aspect: ]

---

- Contrasts perfective vs. imperfective (no progressive and no neutral aspect)
- Is independent of tense and other verbal categories
- Implements imperfective (as unmarked) where other languages would have perfective
- Has a complex and seemingly incoherent array of uses

# [ Traditional Feature Analyses ]

---

- Boundedness, Totality, Definiteness, Change vs. Stability, Sequencing vs. Simultaneity, Exterior vs. Interior, Figure vs. Ground, Punctuality vs. Durativity, Resultative
- Lack intricacy needed to account for uses
- Are ultimately new synonyms for perfective vs. imperfective

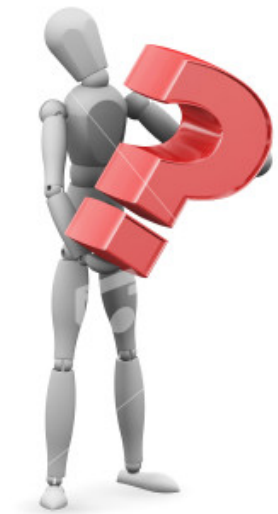

# [The ICM of Matter]

---

- Conflates notions of count vs. mass, solid vs. fluid, hard vs. soft, shaped vs. formless, etc.
- Both more narrow and more richly textured than count vs. mass (basic level)
- Russian has made a heavy morphological investment in nominal distinctions relating to this ICM (individuation)

# [The Two Types of Matter]

- **Discrete Solid Object:**
  - Nut
  - Apple
  - Chair
  - Pail
  - Truck
- **Fluid substance:**
  - Sand
  - Water
  - Air
  - Smoke

# [The Two Types of Matter]

- **Discrete Solid Object:**

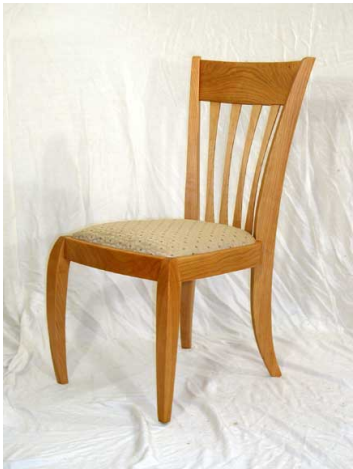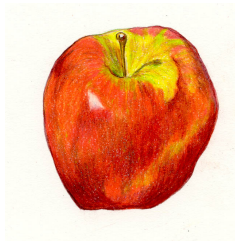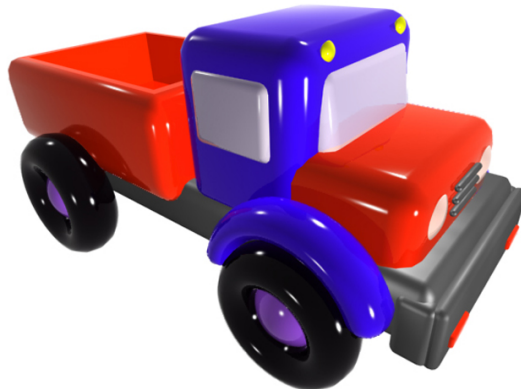

- **Fluid substance:**

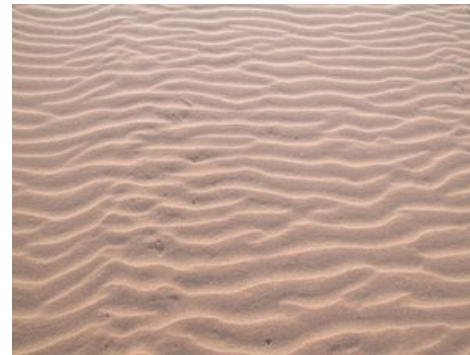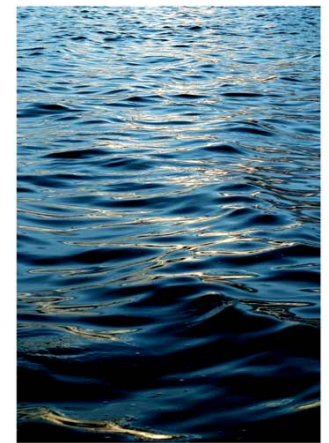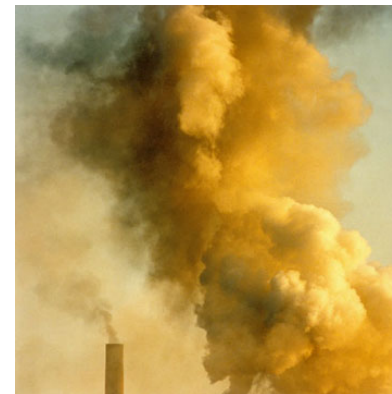

# Temporal Metaphors from General to Specific:

- TIME IS SPACE (well-documented, cf. Haspelmath 1997)
- A SITUATION IS A MATERIAL ENTITY (cf. comparisons of perfective vs. imperfective to count vs. mass)
- PERFECTIVE IS A DISCRETE SOLID OBJECT vs. IMPERFECTIVE IS A FLUID SUBSTANCE

# Russian Investments in Individuation

- Number is overt, obligatory, intricate, and marked on all inflected words as sg or pl (no default general number)
- Russian categorizes as masses items that other languages categorize as individuals (fruits, ethnonyms)
- Collective and singulative suffixes
- Genitive/Locative singular –*u* for mass nouns

# [Parallels between Russian Nominal and Verbal Morphology]

---

- Perfective vs. Imperfective is obligatory and ubiquitous like sg vs. pl
- Semelfactive *-nu-* parallels singulative *-in(k)-a*
- Imperfectivizing suffixes parallel collective suffixes (cf. *-stvo* in *učitel'stvo*)
- Delimitatives in *po-* parallel quantification of masses

# [The Human Observer

---

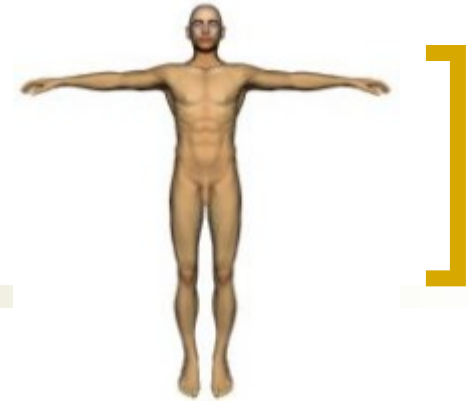

- NOW is a point in the timeline, but it is occupied by a human observer
- The Human Observer is not a point, and interacts with situations the way that a discrete solid interacts with material entities
- This is important for distinguishing future time from present time, and for gnomonic vs. non-gnomonic

# [ Properties of Matter and Parameters of Aspect ]

---

- Inherent Properties -- correspond to inherent structure of situations and act as default values
- Interactional Properties -- correspond to discourse structure, and can override Inherent Properties
- Human Interactional Properties -- correspond to pragmatic structure, and can override Inherent Properties

## [ Analysis of Russian Aspect ]

---

- See the Table and the examples in your handout.
- The letters on the Table correspond to the lettered headings of the examples.
- The numbers correspond to the numbered examples on the handout.

# [ A. – G.: Properties inherent to types of matter ]

---

- A. Edges
- B. Shape
- C. Integrity
- D. Countability
- E. Streamability
- F. Penetrability
- G. Conversions

# [A. Edges]

- Perfective:
  - Has edges 1)

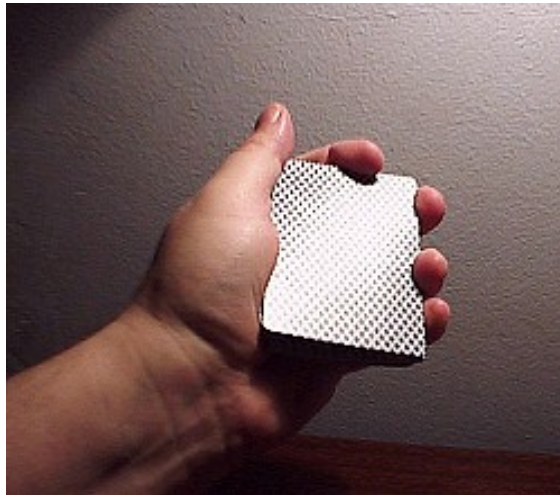

- Imperfective
  - Has no edges 2)

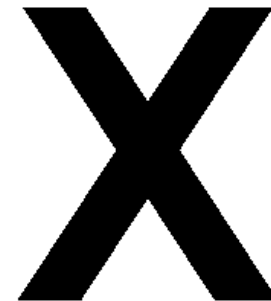

# [ B. Shape ]

- Perfective
  - Can have various shapes  
3), 4), 5)

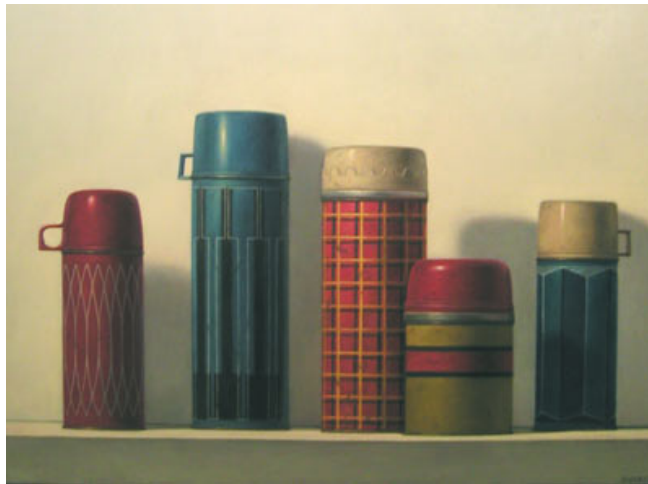

- Imperfective
  - Has no shape  
but can spread  
6), 7), 8), 9)

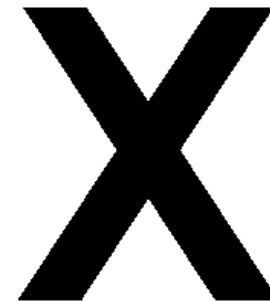

# [C. Integrity]

- Perfective:
  - A unique occurrence 10)
- Imperfective:
  - Continuous processes and repetitions 11), 12)

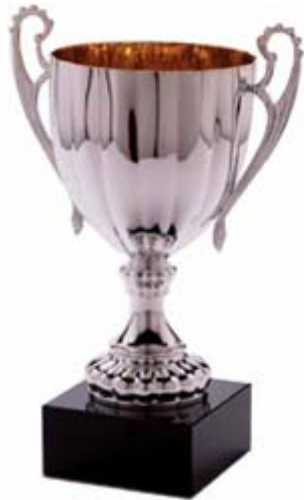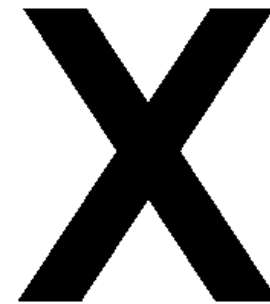

# [ D. Countability ]

- Perfective:
  - Quantified 13), 14)
- Imperfective:
  - Not inherently quantified, can fill 15), 16),

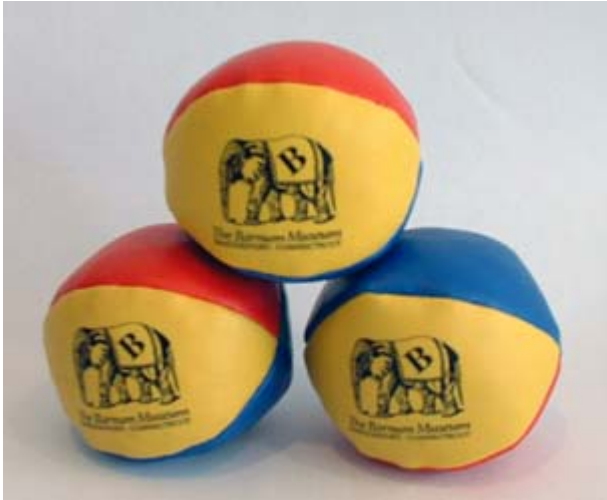

X

# [ E. Streamability ]

---

- Perfective:
  - Gestalt 18)
- Imperfective:
  - Gradual accumulation 19), determined motion verbs

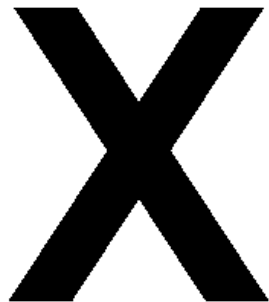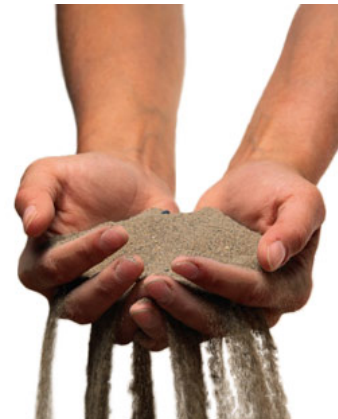

# [ F. Penetrability ]

---

- Perfective:
- Imperfective:  
Internal  
descriptions 20)

**X**

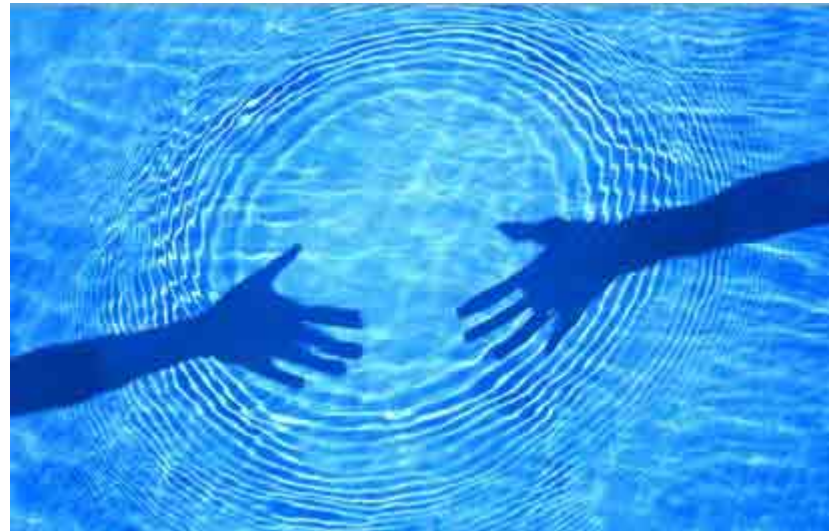

# [ G. Conversions ]

- Perfective:
  - *-nu-*  
singularization,  
packaging (23)
- Imperfective:
  - pulverization &  
piling of  
repetition 21),  
22)

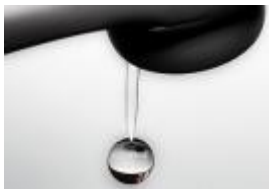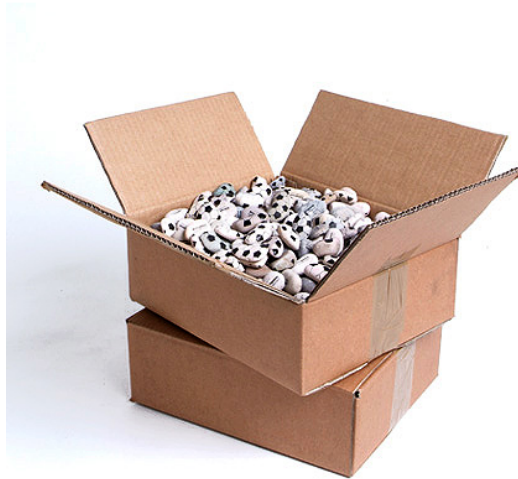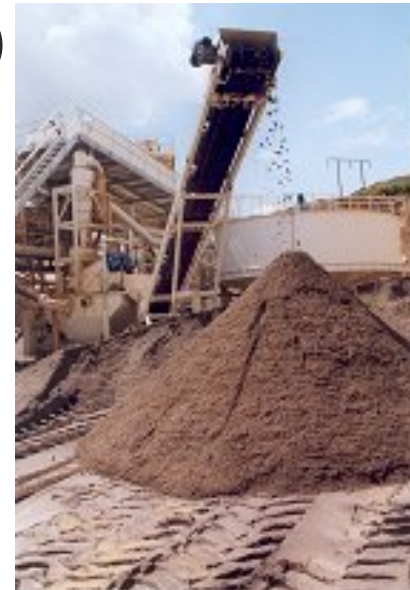

# **H. – K.: Interactions of types of matter and discourse structure**

---

**H. Compatibility**

**I. Dynamicity**

**J. Salience**

**K. Contiguity**

# [ H. Compatibility ]

- Perfective:  
Sequencing and  
future 24), 25),  
26)
- Imperfective:  
Simultaneity and  
present 27), 28),  
29), 30)

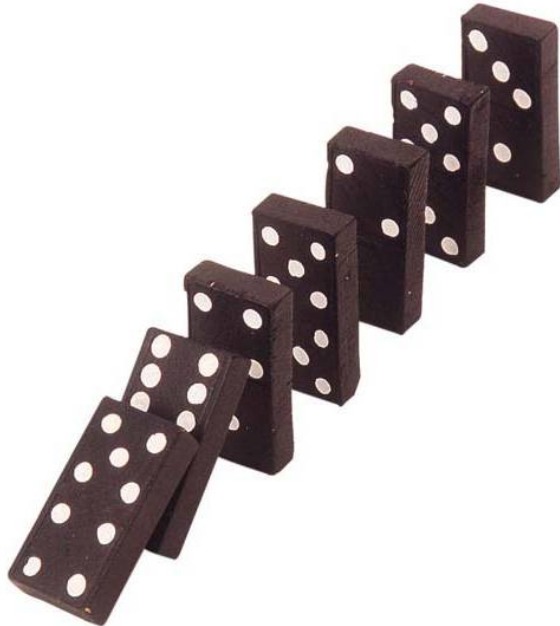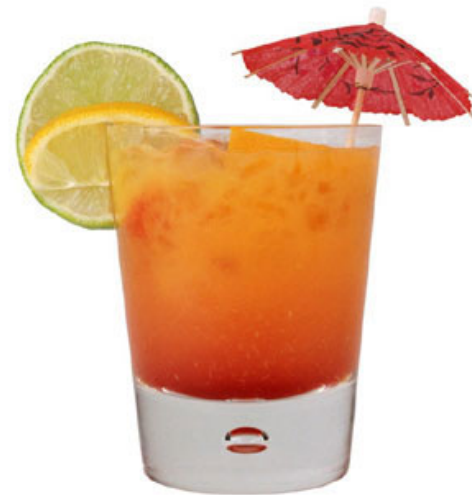

# [ H. Compatibility, cont'd. ]

- Perfective embedded in imperfective:  
Interruption of ongoing action 31)

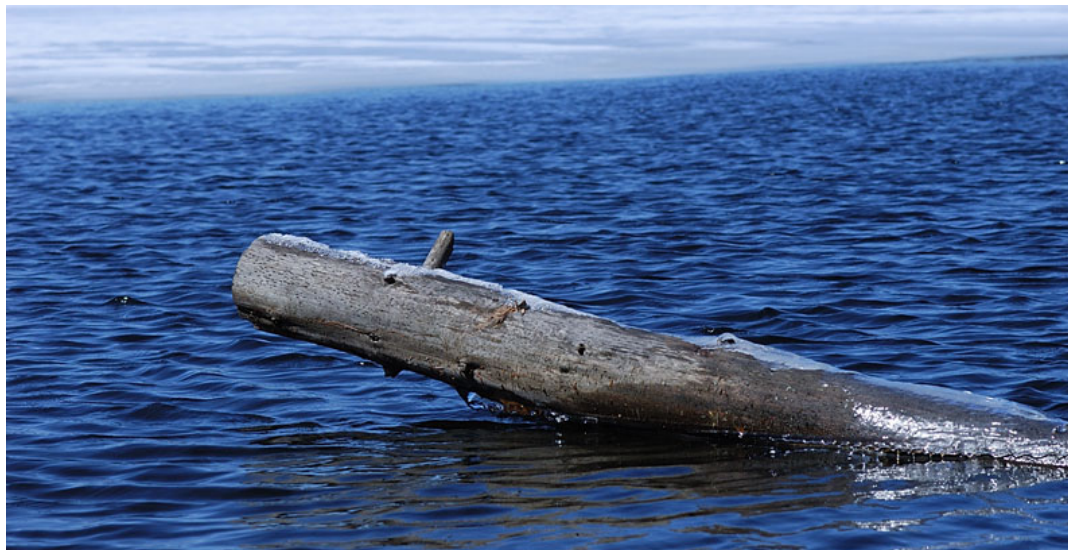

# I. Dynamicity

- Perfective: moves story along 32)
- Imperfective: slows story down 32)

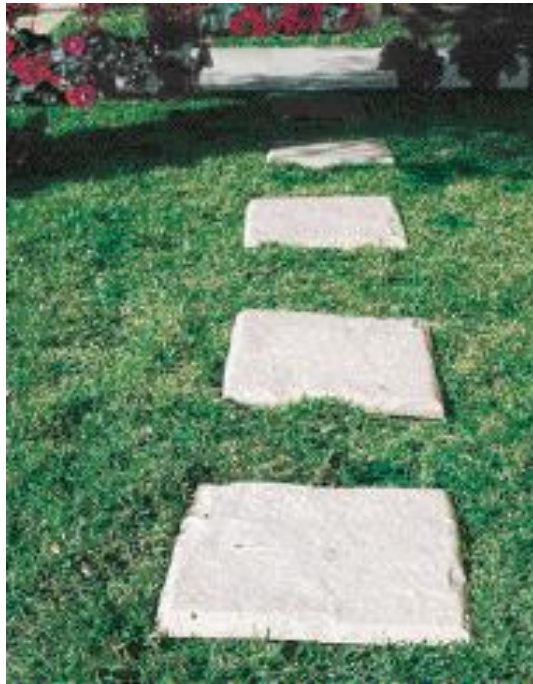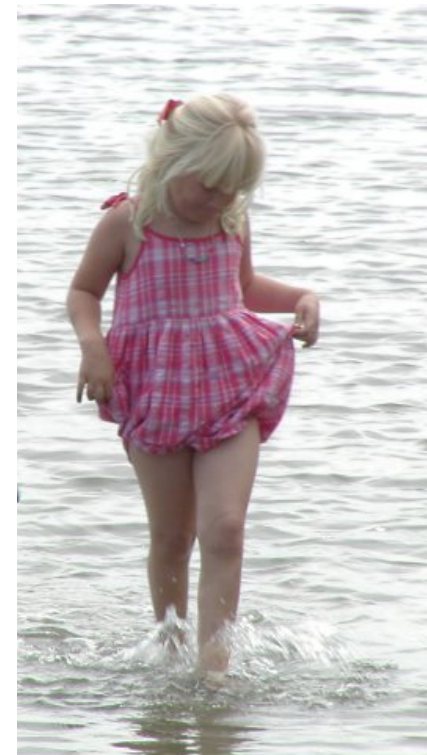

# [ J. Salience ]

- Perfective: obvious, foregrounded events 32)
- Imperfective: backgrounded events 32), 33)

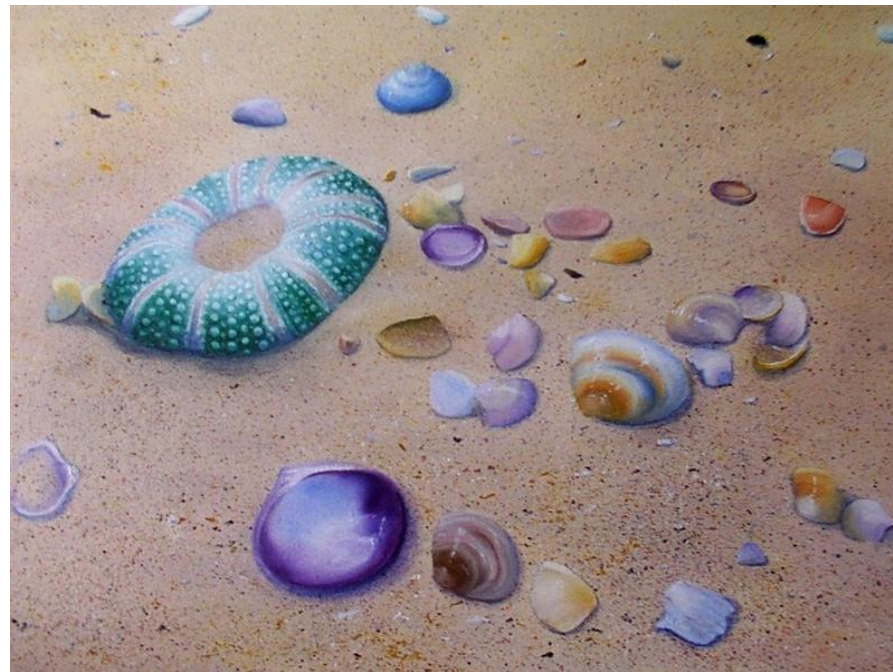

# [ K. Contiguity ]

- Combination of perfective edges with imperfective masses 34), 35), 36)

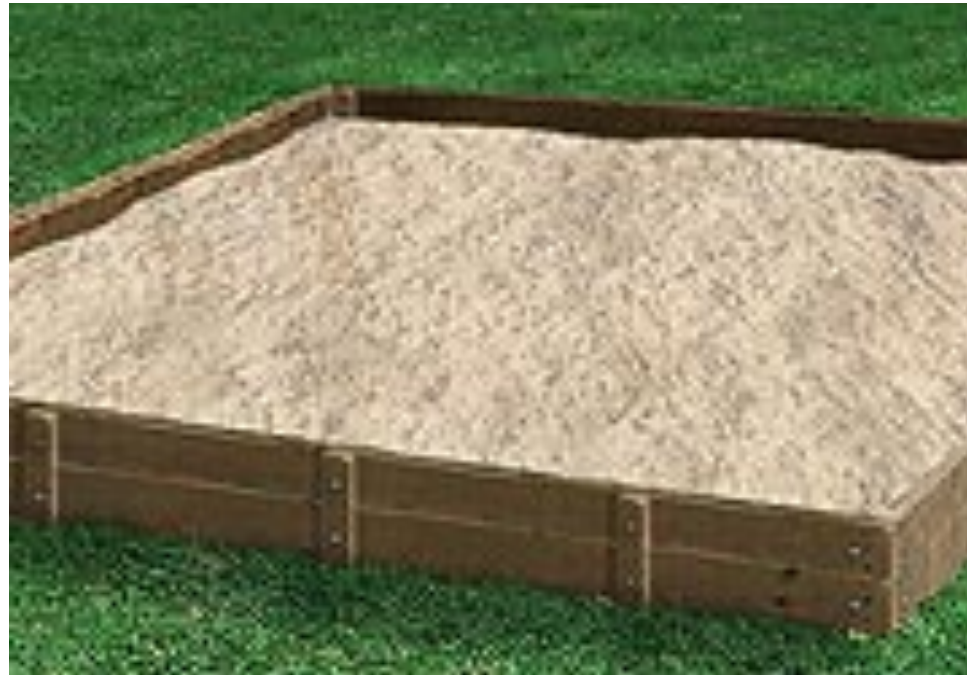

**L. – N.: Interactions of humans  
with types of matter and pragmatic  
structure**

**L. Stability**

**M. Texture**

**N. Implied conversions**

# [ L. Stability ]

- Perfective: satisfying stability 37), 38), 39)
- Imperfective: nothing to grab onto 40), 41)

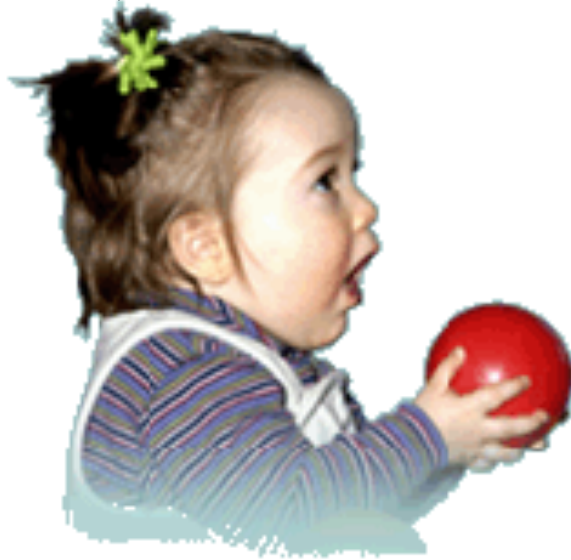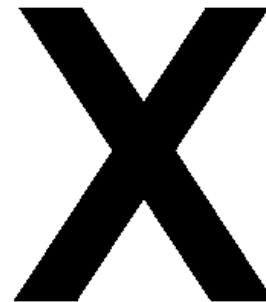

# [ M. Texture ]

- Perfective:  
forceful 42)

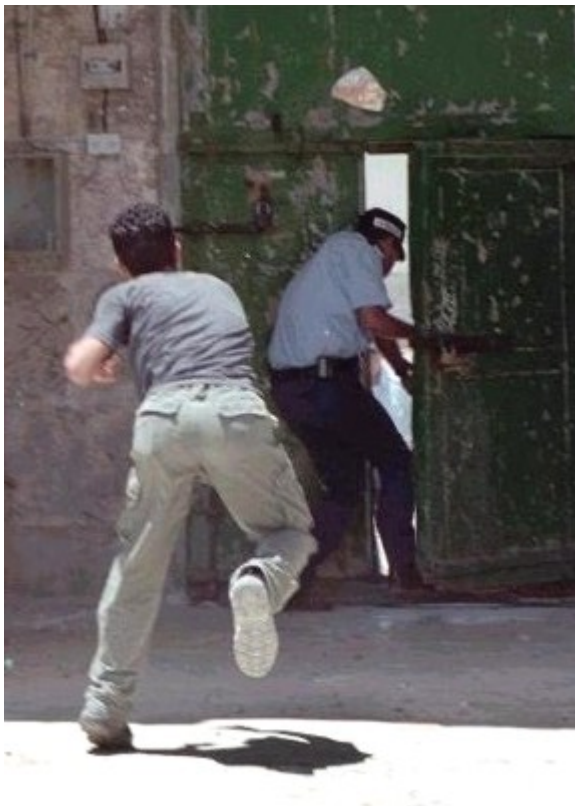

- Imperfective:  
Generalized 43)  
and polite

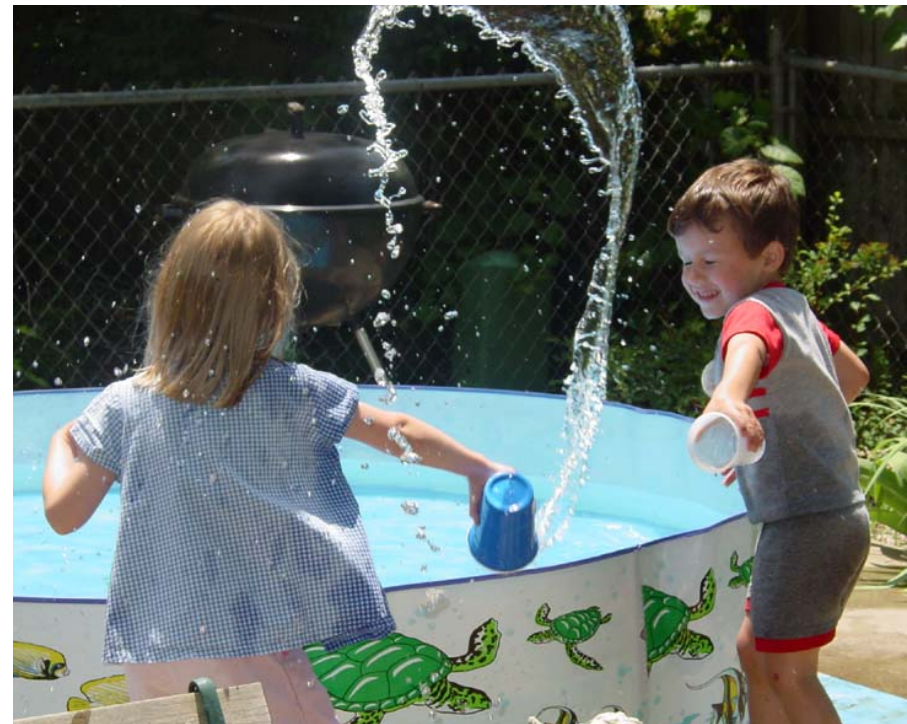

# [ N. Implied conversions ]

- Perfective: Trying and succeeding 44)
- Imperfective: Previous result no longer there 45)

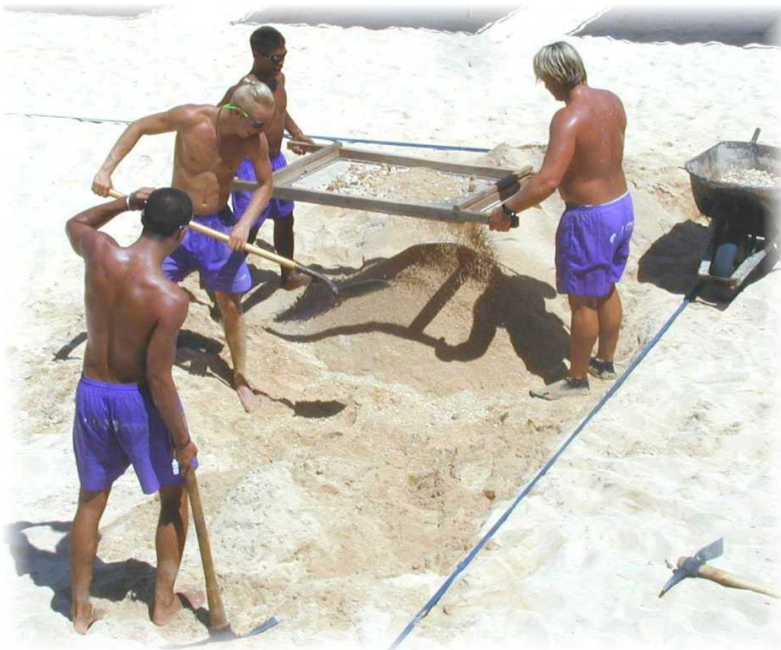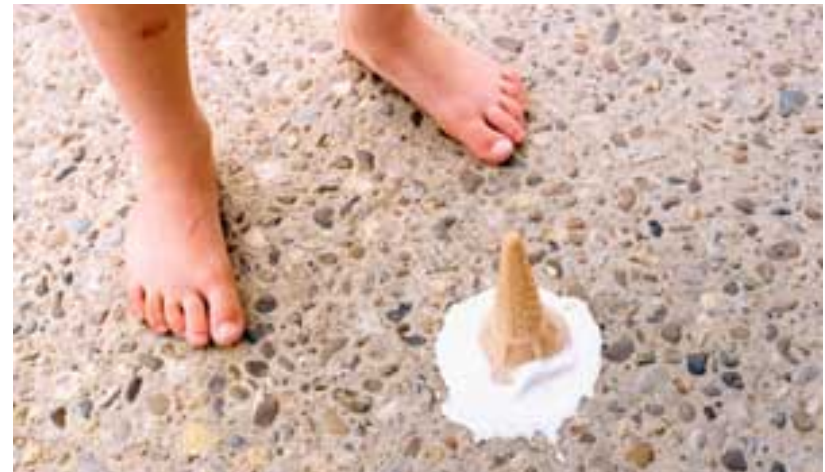

# [Beyond Slavic]

---

- French: more perfective than imperfective; motivated more by closed vs. open or discrete vs. filling; attenuated number
- Chinese: perfective, imperfective and neutral aspect, probably motivated from various sources; reduced number and no formal count vs. mass distinction
- Navajo: Similar to Chinese, and with no number distinction

# [How did this system evolve?]

- In 2011–2012 we will have our research group at the Academy of Sciences in Oslo
- We will focus on:
  - The evolution of concepts of time
  - Relation of linguistic concepts to concepts in other domains (science, belief, art)
