# Supplementary material
Source: publisher figshare collection journal article supplement (https://brill.figshare.com/articles/dataset/_/7092860)
Supplement: Supplementary file 1 [file 1 › Janda 4. metonymy handout.pdf]

“Metonymy Grammar: Word-formation” by Laura A. Janda, Universitetet i Tromsø

Main Idea: Role of metonymy in grammar

Metonymy as a motivating force for **word-formation**

Metonymy is **more** diverse in grammar than in lexicon

## 1. The Big Picture: Why study metonymy in grammar?

Russian example of grammatical metonymy

| source | target | suffix   | source class | target class | source ex                | target ex                                  |
|--------|--------|----------|--------------|--------------|--------------------------|--------------------------------------------|
| PART   | WHOLE  | (i)a/jan | noun         | noun         | <i>brjuxo</i><br>'belly' | <i>brjuxan</i> 'person with a large belly' |

Czech example of grammatical metonymy

| source    | target    | suffix | source class | target class | source ex                  | target ex                       |
|-----------|-----------|--------|--------------|--------------|----------------------------|---------------------------------|
| CONTAINED | CONTAINER | áč-Ø   | noun         | noun         | <i>květina</i><br>'flower' | <i>květínáč</i><br>'flower-pot' |

## 2. Relevant Previous Scholarship

Works on metonymy say little about word-formation

Works on word-formation say little about metonymy

## 3. Databases: Russian, Czech, Norwegian

Databases are inventories of **types**.

**Type:** unique combination of metonymy pattern, word class pattern, suffix

| Language  | #types | # metonymy patterns | # word class patterns | # suffixes |
|-----------|--------|---------------------|-----------------------|------------|
| Russian   | 747    | 110                 | 33                    | 274        |
| Czech     | 561    | 105                 | 23                    | 207        |
| Norwegian | 177    | 60                  | 12                    | 57         |

Table 1: Overall statistics for databases

| metonymy pattern               | illustrative example             |                                  | language of example |
|--------------------------------|----------------------------------|----------------------------------|---------------------|
|                                | source                           | target                           |                     |
| ABSTRACTION FOR CHARACTERISTIC | <i>mysl</i> 'thought'            | <i>myslennyj</i> 'mental'        | Russian             |
| ACTION FOR ABSTRACTION         | <i>myslit</i> 'think'            | <i>myšlenka</i> 'idea'           | Czech               |
| ACTION FOR AGENT               | <i>bake</i> 'bake'               | <i>baker</i> 'baker'             | Norwegian           |
| ACTION FOR CHARACTERISTIC      | <i>bereč</i> 'guard'             | <i>berežnyj</i> 'careful'        | Russian             |
| ACTION FOR INSTRUMENT          | <i>sušit</i> 'dry'               | <i>sušička</i> 'dryer'           | Czech               |
| ACTION FOR PRODUCT             | <i>stifte</i> 'establish'        | <i>stiftelse</i> 'establishment' | Norwegian           |
| CHARACTERISTIC FOR ABSTRACTION | <i>tixij</i> 'quiet'             | <i>tišina</i> 'silence'          | Russian             |
| ENTITY FOR CHARACTERISTIC      | <i>Kafka</i>                     | <i>kafkovský</i> 'Kafkaesque'    | Czech               |
| CHARACTERISTIC FOR ENTITY      | <i>tøff</i> 'tough'              | <i>tøffing</i> 'tough guy'       | Norwegian           |
| ACTION FOR EVENT               | <i>zabastovat</i> 'go on strike' | <i>zabastovka</i> 'strike'       | Russian             |

Table 2: Top ten metonymy patterns shared by all three languages

| metonymy pattern                                                  |             | illustrative example        |                                          |
|-------------------------------------------------------------------|-------------|-----------------------------|------------------------------------------|
| source                                                            | target      | source                      | target                                   |
| Russian <i>-ina</i> : 15 metonymy patterns (9 sources, 7 targets) |             |                             |                                          |
| CHARACTERISTIC                                                    | ABSTRACTION | <i>tixij</i> 'quiet'        | <i>tišina</i> 'silence'                  |
| CHARACTERISTIC                                                    | ENTITY      | <i>ženskij</i> 'female'     | <i>ženščina</i> 'woman'                  |
| ENTITY                                                            | ABSTRACTION | <i>Dostoevskij</i>          | <i>dostoevščina</i> 'Dostoevskian style' |
| ACTION                                                            | PRODUCT     | <i>carapat</i> 'scratch'    | <i>carapina</i> 'scratch'                |
| GROUP                                                             | ENTITY      | <i>vinograd</i> 'grapes'    | <i>vinogradina</i> 'grape'               |
| GROUP                                                             | ABSTRACTION | <i>policejskij</i> 'police' | <i>policejščina</i> 'police repression'  |
| ACTION                                                            | EVENT       | <i>krestit</i> 'christen'   | <i>krestiny</i> 'christening'            |
| CHARACTERISTIC                                                    | MATERIAL    | <i>pušnoj</i> 'fur-bearing' | <i>pušnina</i> 'furs (collect.)'         |
| CHARACTERISTIC                                                    | LOCATION    | <i>ravnyj</i> 'equal'       | <i>ravnina</i> 'plain'                   |
| CHARACTERISTIC                                                    | ENTITY      | <i>rogatyj</i> 'horned'     | <i>rogatina</i> 'bear-spear'             |

|                                                             |             |                                |                                                |
|-------------------------------------------------------------|-------------|--------------------------------|------------------------------------------------|
| CHARACTERISTIC                                              | GROUP       | <i>obščij</i> ‘common’         | <i>obščina</i> ‘community’                     |
| MATERIAL                                                    | ENTITY      | <i>led</i> ‘ice’               | <i>l’dina</i> ‘ice-floe’                       |
| ENTITY                                                      | MATERIAL    | <i>kon</i> ‘horse’             | <i>konina</i> ‘horse-meat’                     |
| PART                                                        | LOCATION    | <i>verx</i> ‘top’              | <i>veršina</i> ‘summit’                        |
| PRODUCT                                                     | ENTITY      | <i>maslo</i> ‘oil’             | <i>maslina</i> ‘olive-tree’                    |
| Czech -ník: 16 metonymy patterns (12 sources, 6 targets)    |             |                                |                                                |
| ABSTRACTION                                                 | ENTITY      | <i>služba</i> ‘service’        | <i>služebník</i> ‘servant’                     |
| ACTION                                                      | AGENT       | <i>pracovat</i> ‘work’         | <i>pracovník</i> ‘worker’                      |
| ACTION                                                      | INSTRUMENT  | <i>narazit</i> ‘collide with’  | <i>nárazník</i> ‘bumper’                       |
| ACTION                                                      | LOCATION    | <i>chodit</i> ‘walk’           | <i>chodník</i> ‘sidewalk’                      |
| CONTAINED                                                   | CONTAINER   | <i>čaj</i> ‘tea’               | <i>čajník</i> ‘teapot’                         |
| ENTITY                                                      | ENTITY      | <i>střevíček</i> ‘lady’s shoe’ | <i>střevíčník</i> ‘lady-slipper (a flower)’    |
| GROUP                                                       | ENTITY      | <i>družstvo</i> ‘collective’   | <i>družstevník</i> ‘collective farmer’         |
| INSTRUMENT                                                  | AGENT       | <i>soustruh</i> ‘lathe’        | <i>soustružník</i> ‘lathe-worker’              |
| LOCATED                                                     | LOCATION    | <i>ryba</i> ‘fish’             | <i>rybník</i> ‘fishpond’                       |
| LOCATION                                                    | AGENT       | <i>knihovna</i> ‘library’      | <i>knihovník</i> ‘librarian’                   |
| LOCATION                                                    | LOCATED     | <i>skála</i> ‘cliff’           | <i>skalník</i> ‘cotoneaster (grows on cliffs)’ |
| MATERIAL                                                    | AGENT       | <i>zlatý</i> ‘gold’            | <i>zlatník</i> ‘goldsmith’                     |
| MATERIAL                                                    | ENTITY      | <i>pára</i> ‘steam’            | <i>parník</i> ‘steamboat’                      |
| PATIENT                                                     | AGENT       | <i>papír</i> ‘paper’           | <i>papírník</i> ‘seller of paper goods’        |
| PRODUCT                                                     | AGENT       | <i>kouzlo</i> ‘magic’          | <i>kouzelník</i> ‘magician’                    |
| QUANTITY                                                    | ENTITY      | <i>pět</i> ‘five’              | <i>pětník</i> ‘5 crown piece’                  |
| Norwegian -ing: 11 metonymy patterns (5 sources, 9 targets) |             |                                |                                                |
| ACTION                                                      | ABSTRACTION | <i>bake</i> ‘bake’             | <i>baking</i> ‘baking’                         |
| ACTION                                                      | EVENT       | <i>trene</i> ‘train’           | <i>trening</i> ‘practice’                      |
| ACTION                                                      | GROUP       | <i>regjere</i> ‘govern’        | <i>regjering</i> ‘government’                  |
| ACTION                                                      | LOCATION    | <i>fylle</i> ‘fill’            | <i>fylking</i> ‘landfill’                      |
| ACTION                                                      | MATERIAL    | <i>male</i> ‘paint’            | <i>malning</i> ‘paint’                         |
| ACTION                                                      | PRODUCT     | <i>tegne</i> ‘draw’            | <i>tegning</i> ‘drawing’                       |
| CHARACTERISTIC                                              | ENTITY      | <i>tøff</i> ‘tough’            | <i>tøffing</i> ‘tough guy’                     |
| LOCATION                                                    | LOCATED     | <i>Vestlandet</i>              | <i>vestlending</i> ‘person from Vestlandet’    |
| STATE                                                       | ABSTRACTION | <i>sone</i> ‘do time in jail’  | <i>soning</i> ‘incarceration’                  |
| STATE                                                       | LOCATION    | <i>skråne</i> ‘slant’          | <i>skråning</i> ‘slope’                        |
| WHOLE                                                       | PART        | <i>kveld</i> ‘evening’         | <i>kvelding</i> ‘dusk’                         |

Table 3: Highly versatile suffixes in Russian, Czech, Norwegian

| metonymy pattern                      |                | illustrative example       |                                         |
|---------------------------------------|----------------|----------------------------|-----------------------------------------|
| source                                | target         | source                     | target                                  |
| Russian -o/evyj: 10 sources, 1 target |                |                            |                                         |
| ABSTRACTION                           | CHARACTERISTIC | <i>vkus</i> ‘taste’        | <i>vkusovoj</i> ‘taste, gustatory’      |
| MATERIAL                              | CHARACTERISTIC | <i>benzin</i> ‘gasoline’   | <i>benzinovyj</i> ‘gasoline’            |
| ENTITY                                | CHARACTERISTIC | <i>slon</i> ‘elephant’     | <i>slonovyj</i> ‘elephant’              |
| TIME                                  | CHARACTERISTIC | <i>čas</i> ‘hour’          | <i>časovoj</i> ‘hour-long’              |
| PART                                  | CHARACTERISTIC | <i>gorlo</i> ‘throat’      | <i>gorlovvoj</i> ‘throat’               |
| LOCATION                              | CHARACTERISTIC | <i>kraj</i> ‘region’       | <i>kraevvoj</i> ‘regional’              |
| GROUP                                 | CHARACTERISTIC | <i>orkestr</i> ‘orchestra’ | <i>orkestrovoj</i> ‘orchestral’         |
| INSTRUMENT                            | CHARACTERISTIC | <i>ščipcy</i> ‘tongs’      | <i>ščipcovyj</i> ‘relating to tongs’    |
| ACTION                                | CHARACTERISTIC | <i>torgovat</i> ‘trade’    | <i>torgovyj</i> ‘trading’               |
| CHARACTERISTIC                        | CHARACTERISTIC | <i>černyj</i> ‘black’      | <i>černovoj (variant)</i> ‘first draft’ |
| Czech -dlo: 2 sources, 7 targets      |                |                            |                                         |
| ACTION                                | AGENT          | <i>zlobit</i> ‘be naughty’ | <i>zlobidlo</i> ‘naughty person’        |
| ACTION                                | GROUP          | <i>plavat</i> ‘swim’       | <i>plavidlo</i> ‘all types of boats’    |
| ACTION                                | INSTRUMENT     | <i>létat</i> ‘fly’         | <i>letadlo</i> ‘airplane’               |
| ACTION                                | LOCATION       | <i>dívat se</i> ‘watch’    | <i>divadlo</i> ‘theater’                |
| ACTION                                | MATERIAL       | <i>mýt</i> ‘wash’          | <i>mýdlo</i> ‘soap’                     |
| ACTION                                | PART           | <i>chodit</i> ‘walk’       | <i>chodidlo</i> ‘sole of foot’          |
| ACTION                                | PATIENT        | <i>jíst</i> ‘eat’          | <i>jídlo</i> ‘food’                     |
| STATE                                 | LOCATION       | <i>sedat, sedět</i> ‘sit’  | <i>sedadlo</i> ‘seat’                   |

Table 4: Balance of sources and targets among suffixes

#### 4. Observations: Comparison with lexicon, directionality, cross-linguistic

Metonymy patterns found only in the lexicon (full list of 9 items):

- ACTION FOR TIME: *la saison* (< ‘act of sowing’)
- AGENT FOR PRODUCT: *(I’m reading) Shakespeare*
- TIME FOR ENTITY: *the sixties*
- CONSEQUENT FOR ANTECEDENT: *phobos* (‘fear’ < ‘flight’)
- SUBEVENT FOR COMPLEX EVENT: *mother is cooking potatoes* (involves also washing, peeling, etc.)
- CAUSE FOR EFFECT: *unlock the prisons* (meaning ‘set the prisoners free’)
- POTENTIAL FOR ACTUAL: *Can you see him?* (meaning ‘Do you see him?’)
- HYPONYM FOR HYPERNYM: *Kodak* (meaning ‘camera’)
- HYPERNYM FOR HYPONYM: *the pill* (meaning ‘contraceptive pill’)

Metonymy patterns shared by lexicon and word-formation (sample from 79 items):

- ACTION FOR AGENT: *a snitch*; *hrabal* ‘greedy person’ (< *hrabat* ‘rake’)
- ACTION FOR INSTRUMENT: *Andenken* (‘keepsake’ < ‘act of remembering’); *odměrka* ‘measuring-cup’ (< *odměřit* ‘measure’)
- ACTION FOR LOCATION: *Gang* (‘corridor’ < ‘act of walking’); *parkoviště* ‘parking-lot’ (< *parkovat* ‘park’)
- INSTRUMENT FOR ACTION: *to ski*; *bičovat* ‘beat with a whip’ (< *bič* ‘whip’)
- ACTION FOR PATIENT: *achat* (‘purchase’ < ‘act of buying’); *lízátko* ‘lollipop’ (< *lízat* ‘lick’)
- AGENT FOR ACTION: *to butcher*; *pytláčit* ‘do poaching’ (< *pytlák* ‘poacher’)
- CHARACTERISTIC FOR ENTITY: *a beauty*; *naháč* ‘naked person’ (<  *nahý* ‘naked’)
- CONTAINER FOR CONTAINED: *(to drink) a glass*; *kapesné* ‘pocket-money’ (< *kapsa* ‘pocket’)

Metonymy patterns found only in word-formation (sample from 54 items):

- ABSTRACTION FOR ACTION: *toužit* ‘long for’ (< *touha* ‘desire’)
- ABSTRACTION FOR MANNER: *honem* ‘quickly’ (< *hon* ‘chase’)
- ACTION FOR CHARACTERISTIC: *váhavý* ‘hesitant’ (< *váhat* ‘hesitate’)
- ACTION FOR EVENT: *zabíjačka* ‘pig-slaughtering’ (< *zabít* ‘kill’)
- ACTION FOR GROUP: *plavidlo* ‘all types of boats’ (< *plavat* ‘sail’)
- CHARACTERISTIC FOR ACTION: *chladit* ‘cool[verb]’ (< *chladný* ‘cool[adj.]’)
- CHARACTERISTIC FOR CHANGE STATE: *mládnout* ‘grow younger’ (< *mladý* ‘young’)
- EVENT FOR CHARACTERISTIC: *válečný* ‘war[adj.]’ (< *válka* ‘war’)
- PATIENT FOR ACTION: *věznit* ‘imprison’ (< *vězeň* ‘prisoner’)
- STATE FOR ABSTRACTION: *nenávidět* ‘hatred’ (< *nenávidět* ‘hate’)
- TIME FOR CHARACTERISTIC: *včerejší* ‘yesterday’s’ (< *včera* ‘yesterday’)

Table 5: Comparison of metonymy patterns across lexicon and word-formation

| Russian and Czech           |                 |                       |                                |
|-----------------------------|-----------------|-----------------------|--------------------------------|
|                             |                 | illustrative example  |                                |
| metonymy patterns           | # of suffixes   | source                | target                         |
| LOCATION FOR CHARACTERISTIC | 22 (R), 14 (Cz) | <i>centr</i> ‘center’ | <i>central’nyj</i> ‘central’   |
| POSSESSOR FOR POSSESSED     | 18 (R), 11 (Cz) | <i>kráva</i> ‘cow’    | <i>kraví</i> ‘cow’s’           |
| STATE FOR CHARACTERISTIC    | 12 (R), 10 (Cz) | <i>želat</i> ‘want’   | <i>želatel’nyj</i> ‘desirable’ |
| CHARACTERISTIC FOR LOCATION | 11 (R), 6 (Cz)  | <i>suxoj</i> ‘dry’    | <i>suša</i> ‘dry land’         |

|                                   |               |                        |                                               |
|-----------------------------------|---------------|------------------------|-----------------------------------------------|
| PART FOR WHOLE                    | 9 (R), 9 (Cz) | <i>uši</i> 'ears'      | <i>ušák</i> 'bunny'                           |
| Russian                           |               |                        |                                               |
|                                   |               | illustrative example   |                                               |
| metonymy patterns                 | # of suffixes | source                 | target                                        |
| CHARACTERISTIC FOR MATERIAL       | 9             | <i>gustoj</i> 'thick'  | <i>gušča</i> 'dregs'                          |
| INSTRUMENT FOR CHARACTERISTIC     | 4             | <i>ščipcy</i> 'tongs'  | <i>ščipcovyj</i> 'relating to tongs'          |
| CHARACTERISTIC FOR CHARACTERISTIC | 4             | <i>velikij</i> 'great' | <i>veličavij</i> 'stately, majestic'          |
| Czech                             |               |                        |                                               |
|                                   |               | illustrative example   |                                               |
| metonymy patterns                 | # of suffixes | source                 | target                                        |
| CONTAINED FOR CONTAINER           | 11            | <i>písek</i> 'sand'    | <i>pískoviště</i> 'sandbox'                   |
| PRODUCT FOR LOCATION              | 6             | <i>mléko</i> 'milk'    | <i>mlékárna</i> 'dairy'                       |
| QUANTITY FOR ENTITY               | 6             | <i>sedm</i> 'seven'    | <i>sedmička</i> 'number 7 bus, highway, etc.' |
| Norwegian                         |               |                        |                                               |
|                                   |               | illustrative example   |                                               |
| metonymy patterns                 | # of suffixes | source                 | target                                        |
| LOCATION FOR LOCATED              | 8             | Strømmen               | <i>strømling</i> 'person from Strømmen'       |
| PRODUCT FOR AGENT                 | 5             | <i>musikk</i> 'music'  | <i>musikant</i> 'musician'                    |

Table 6: Language-specific preferences for metonymy patterns

## 5. Conclusions

- The main purpose of word-formation is to signal metonymy
- Metonymy in word-formation is more diverse than in lexical use
- Different languages make different investments in word-formation to signal metonymy
