# Supplementary material
Source: publisher figshare collection journal article supplement (https://brill.figshare.com/articles/dataset/_/7092860)
Supplement: Supplementary file 1 [file 1 › Janda 5. constructional profiles handout.pdf]

“Constructional profiles: What grammatical constructions tell us about the meanings of words”  
 Laura A. Janda, in collaboration with Valery Solovyev, Olga Lyashevskaya, Svetlana Sokolova

Assumptions:

- Grammatical and lexical meaning observe the **same** principles
- **Polysemy** is common to both types of meaning
- **Radial categories** of relationships among meanings:
  - **prototype** based on physical experience
  - extension via **metonymy**
  - extension via **metaphor**
- Difference in **form** implies difference in **meaning**

A constructional profile is “the distribution of relative frequencies of constructions associated with a given word”.

The null hypothesis is that all nouns should have equal frequency in all constructions. But corpus data shows that distributions are strongly skewed.

Hypothesis: Each word has a unique constructional profile.

Corrolary: Words with similar meanings should have similar constructional profiles.

SADNESS nouns

|        | <i>pečal'</i> |      | <i>toska</i> |      | <i>xandra</i> |      | <i>melanxolija</i> |      | <i>grust'</i> |      | <i>unynie</i> |      |
|--------|---------------|------|--------------|------|---------------|------|--------------------|------|---------------|------|---------------|------|
| v+Acc  | 16            | 5%   | 8            | 3%   | 30            | 21%  | 52                 | 23%  | 6             | 2%   | 126           | 41%  |
| v+Loc  | 22            | 7%   | 16           | 6%   | 10            | 7%   | 16                 | 7%   | 6             | 2%   | 33            | 11%  |
| Inst   | 32            | 10%  | 33           | 12%  | 10            | 7%   | 45                 | 20%  | 27            | 9%   | 16            | 5%   |
| s+Inst | 49            | 16%  | 70           | 25%  | 19            | 14%  | 5                  | 2%   | 160           | 55%  | 16            | 5%   |
| ot+Gen | 16            | 5%   | 39           | 14%  | 29            | 21%  | 20                 | 9%   | 3             | 1%   | 14            | 4%   |
| DO     | 128           | 41%  | 84           | 30%  | 20            | 14%  | 32                 | 14%  | 50            | 17%  | 25            | 8%   |
| other  | 52            | 17%  | 33           | 12%  | 22            | 16%  | 57                 | 25%  | 38            | 13%  | 82            | 27%  |
| Total  | 315           | 100% | 283          | 100% | 140           | 100% | 227                | 100% | 290           | 100% | 304           | 100% |

HAPPINESS nouns

|        | <i>naslaždenie</i> |      | <i>radost'</i> |      | <i>udovol'stvie</i> |      | <i>likovanie</i> |      | <i>vostorg</i> |      | <i>ščastie</i> |      |
|--------|--------------------|------|----------------|------|---------------------|------|------------------|------|----------------|------|----------------|------|
| v+Acc  | 0                  | 0%   | 0              | 0%   | 0                   | 0%   | 4                | 1%   | 42             | 14%  | 3              | 1%   |
| v+Loc  | 3                  | 1%   | 1              | 0%   | 4                   | 1%   | 21               | 5%   | 35             | 12%  | 4              | 1%   |
| Inst   | 12                 | 4%   | 21             | 7%   | 4                   | 1%   | 39               | 10%  | 18             | 6%   | 33             | 7%   |
| s+Inst | 117                | 40%  | 92             | 32%  | 165                 | 41%  | 90               | 23%  | 58             | 19%  | 4              | 1%   |
| ot+Gen | 9                  | 3%   | 41             | 14%  | 24                  | 6%   | 8                | 2%   | 66             | 22%  | 89             | 19%  |
| DO     | 111                | 38%  | 106            | 37%  | 171                 | 42%  | 171              | 44%  | 67             | 22%  | 207            | 44%  |
| other  | 39                 | 13%  | 24             | 8%   | 39                  | 10%  | 59               | 15%  | 18             | 6%   | 132            | 28%  |
| Total  | 291                | 100% | 285            | 100% | 407                 | 100% | 392              | 100% | 304            | 100% | 472            | 100% |

The following two tables are proximity matrices stating the squared Euclidian distances that establish the hierarchical clusters. The relevant values are bold-faced.

SADNESS nouns

| Case      | Squared Euclidean Distance (z scores) |               |              |              |          |          |
|-----------|---------------------------------------|---------------|--------------|--------------|----------|----------|
|           | 1:grust'                              | 2:melanx      | 3:pechal'    | 4:toska      | 5:unynie | 6:xandra |
| 1:grust'  | 0.000                                 | 14.235        | 11.705       | 12.762       | 27.415   | 13.662   |
| 2:melanx  | 14.235                                | 0.000         | 8.041        | 8.226        | 12.798   | 11.715   |
| 3:pechal' | <b>11.705</b>                         | <b>8.041</b>  | 0.000        | 5.844        | 17.123   | 14.679   |
| 4:toska   | 12.762                                | 8.226         | <b>5.844</b> | 0.000        | 23.880   | 7.968    |
| 5:unynie  | 27.415                                | <b>12.798</b> | 17.123       | 23.880       | 0.000    | 19.949   |
| 6:xandra  | 13.662                                | 11.715        | 14.679       | <b>7.968</b> | 19.949   | 0.000    |

**5.844** joins *pečal'* with *toska*, **7.968** adds *xandra*, **8.041** adds *melanxolija*, **11.705** adds *grust'*, **12.798** adds *unynie*.

## HAPPINESS nouns

| Case       | Squared Euclidean Distance (z scores) |              |               |            |           |            |
|------------|---------------------------------------|--------------|---------------|------------|-----------|------------|
|            | 1:likovani                            | 2:naslazd    | 3:radost'     | 4:udovol's | 5:vostorg | 6:schastie |
| 1:likovani | 0.000                                 | 7.879        | 7.370         | 11.209     | 17.261    | 13.960     |
| 2:naslazd  | 7.879                                 | 0.000        | 1.812         | 2.687      | 17.219    | 21.301     |
| 3:radost'  | <b>7.370</b>                          | <b>1.812</b> | 0.000         | 5.501      | 14.124    | 16.121     |
| 4:udovol's | 11.209                                | <b>2.687</b> | 5.501         | 0.000      | 22.367    | 23.188     |
| 5:vostorg  | 17.261                                | 17.219       | <b>14.124</b> | 22.367     | 0.000     | 28.001     |
| 6:schastie | <b>13.960</b>                         | 21.301       | 16.121        | 23.188     | 28.001    | 0.000      |

**1.812** joins *naslaždenie* and *radost'*, **2.687** adds *udovol'stvie*, **7.370** adds *likovanie*, **13.960** adds *sčastie*, **14.124** adds *vostorg*.

The results are statistically significant:

- For 'sadness' nouns: chi square = 730.35, and Cramer's V = 0.305 which qualifies as a moderate effect ( $p < 0.0001$ ,  $df = 30$ )
- For 'happiness' nouns: chi square = 774.6, Cramer's V = 0.268 which qualifies as a moderate effect ( $p < 0.0001$ ,  $df = 30$ )

Constructional profiles reveal that emotions such as happiness and sadness in Russian are understood as:

- **metaphorical** holes
- **metaphorical** agents
- **metaphorical** companions
- **metaphorical** diseases
- **metaphorical** sources

"Empty" prefixes?

In aspectual pairs such as *pisat'/napisat'*, *morozit'/zamorozit'*, *obedat'/poobedat'*, it is assumed that the prefixes *na-*, *za-*, *po-* are "empty" (have no meaning).

Some verbs have several "empty" prefixes: *gruzit'* has the perfectives *nagruzit'*, *zagrunit'*, *pogrunit'*.

Constructional profiles show that the verbs have different meanings and the prefixes are not empty, since you cannot have three different "zeroes".

Data for constructional profiles of verbs

1920 examples extracted from Modern subcorpus (1950-2009) of the RNC

| All non-passive forms | raw frequency | Passive participles | raw frequency |
|-----------------------|---------------|---------------------|---------------|
| <i>gruzit'</i>        | 286           | <i>gružen</i>       | 107           |
| <i>nagruzit'</i>      | 147           | <i>nagružen</i>     | 221           |
| <i>zagrunit'</i>      | 208           | <i>zagrūžen</i>     | 248           |
| <i>pogrunit'</i>      | 254           | <i>pogrūžen</i>     | 449           |

Table 1: Raw frequencies for the forms of the verb *gruzit'* 'load' and its Natural Perfectives.

Logistic regression shows a highly significant correlation between the factors mentioned above and the choice of construction: LL-ratio  $\chi^2$  (the difference between the two deviance values, with and without predictors) is 1738.47, Nagelkerke's  $R^2$  (correlational strength) is 0.796,  $C$  value (the coefficient of concordance which according to Gries (2009) should ideally be .8 or higher) is 0.964, Somer's  $D_{xy}$  (rank correlation between predicted and observed responses) is 0.928,  $df = 8$ ,

overall  $p$  is 0. The optimal model has high classificatory power: 88.5 % constructions are predicted correctly.

The odds ratio, 95%-CI and  $p$  for the significant predictors VERB, REDUCED, PARTICIPLE, and VERB:PARTICIPLE are shown in Table 2:

| Variable              | Odds ratio | 95%-Confidence Interval |              | p-value  |     |
|-----------------------|------------|-------------------------|--------------|----------|-----|
| VERBna                | 0.097      | 5.928746e-02            | 1.549363e-01 | < 2e-16  | *** |
| VERBpo                | 79.888     | 1.744470e+01            | 1.416632e+03 | 1.49e-05 | *** |
| VERBza                | 0.289      | 1.951300e-01            | 4.245384e-01 | 3.68e-10 | *** |
| REDUCEDyes            | 0.411      | 2.907612e-01            | 5.773928e-01 | 3.67e-07 | *** |
| PARTICIPLEyes         | 0.003      | 1.450705e-04            | 1.203072e-02 | 4.66e-09 | *** |
| VERB na:PARTICIPLEyes | 5.881      | 2.244183e-01            | 1.541567e+02 | 0.219043 | ns  |
| VERB po:PARTICIPLEyes | 289.170    | 9.203405e+00            | 9.763774e+03 | 0.000373 | *** |
| VERB za:PARTICIPLEyes | 24.057     | 4.314377e+00            | 4.521877e+02 | 0.003034 | **  |

Table 2: Statistical significance of the independent variables and their interactions.

For more details and references, see:

Janda, Laura A. and Valery Solovyev. 2009. "What Constructional Profiles Reveal About Synonymy: A Case Study of Russian Words for SADNESS and HAPPINESS". *Cognitive Linguistics* 20:2, 367-393.

Sokolova, Svetlana, Laura A. Janda and Olga Lyashevskaya. Forthcoming. "The Locative Alternation and the Russian 'empty' prefixes: A case study of the verb *gruzit* 'load'". In: D. Divjak & St. Th. Gries (eds.). *Frequency effects in cognitive linguistics (Vol. 2): what statistical effects can(not) explain* (Trends in Linguistics Series). Berlin: Mouton de Gruyter.
