# Supplementary material
Source: publisher figshare collection journal article supplement (https://brill.figshare.com/articles/dataset/_/7092860)
Supplement: Supplementary file 1 [file 1 › Janda 5. constructional profiles.ppt.pdf]

# Constructional profiles: What constructions tell us about the meanings of words

Laura A. Janda

Universitetet i Tromsø

in collaboration with

Valery Solovyev, Svetlana Sokolova and  
Olga Lyashevskaya

# Constructional Profiles

- A constructional profile is “the distribution of relative frequencies of constructions associated with a given word”
- There are about 70 constructions of the form “*[(preposition) [noun]<sub>case</sub>]*” in Russian
- The null hypothesis is that all nouns should have equal frequency in all constructions
- But only about 6 (or fewer) constructions are needed to characterize a given noun
- (cf. similar findings by Karlsson 1985, 1986 and Arppe 2001, 2005)
- Example of constructional profile of *vostorg* ‘ecstasy’

# vostorg 'ecstasy'

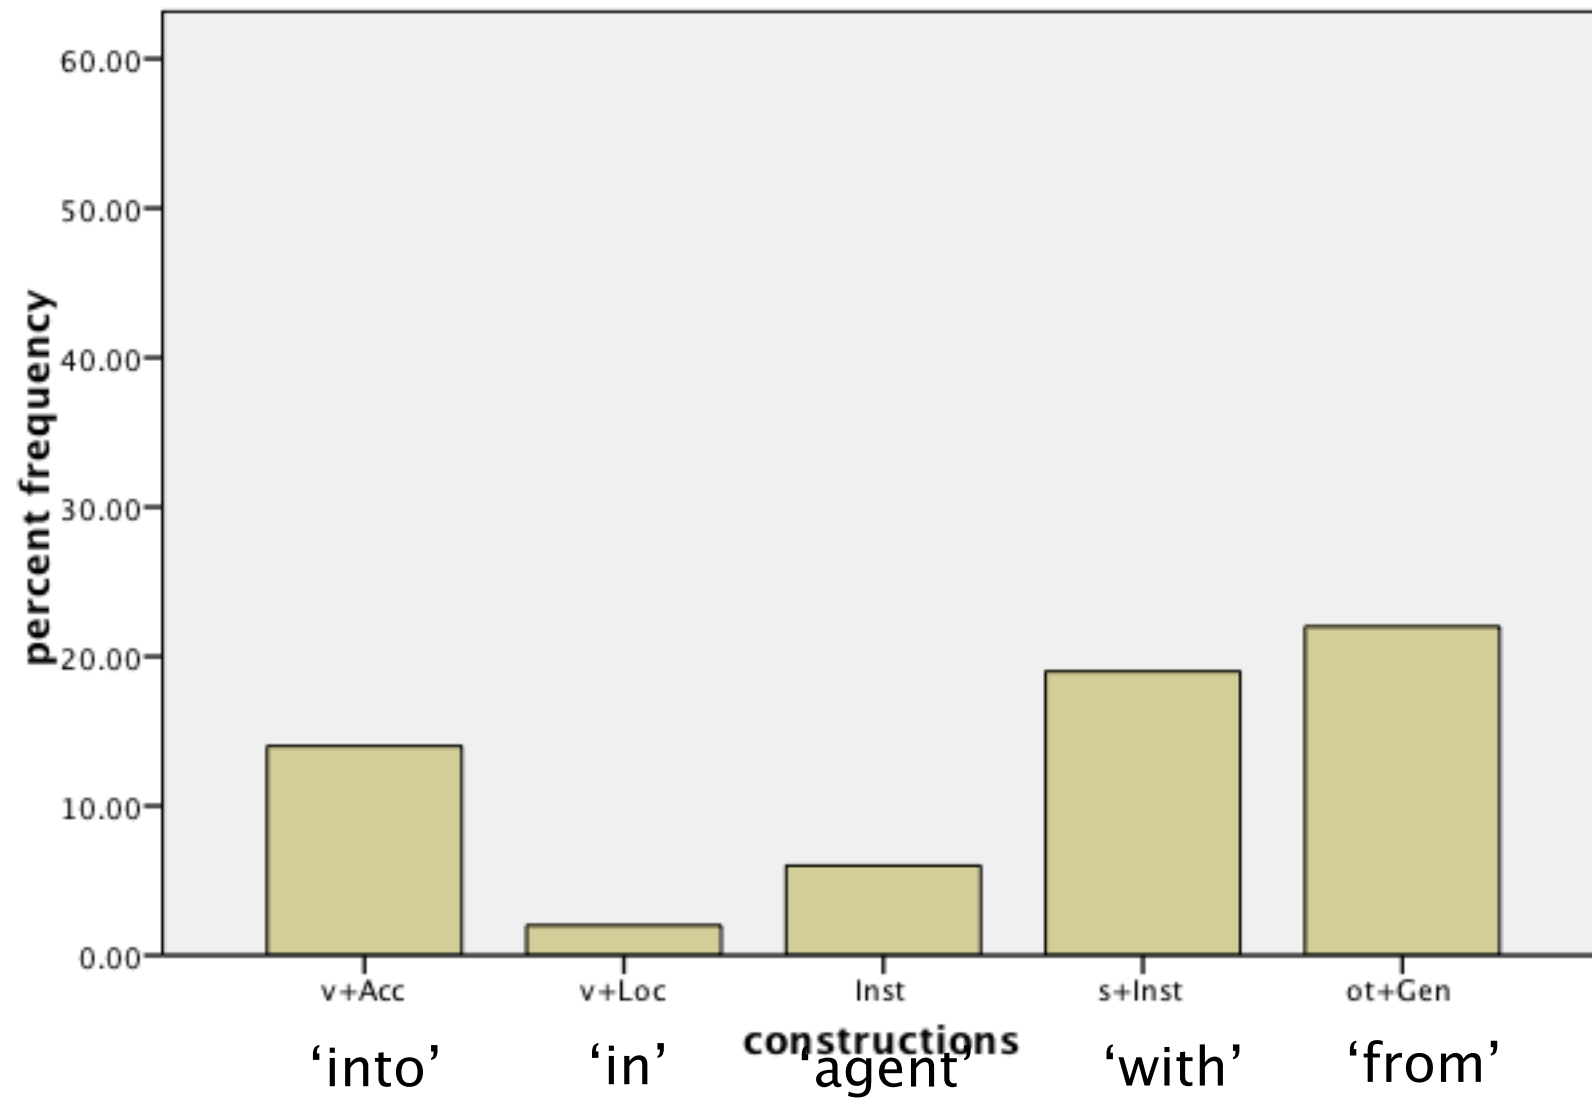

# Where the data come from

- Russian National Corpus (<http://www.ruscorpora.ru>) > 120M words
- Biblioteka Maksima Moškova (<http://lib.ru/>) > 600M words
- 500 sentences extracted and coded for use of preposition & case

# Synonymy

- Hypothesis: Each word has a unique constructional profile
- Corollary: Words with similar meanings should have similar constructional profiles
- Hierarchical cluster analysis shows which constructional profiles are closest (closer synonyms) and which are further apart, using squared Euclidean distances based on constructional profile data

# ‘Sadness’ in Russian

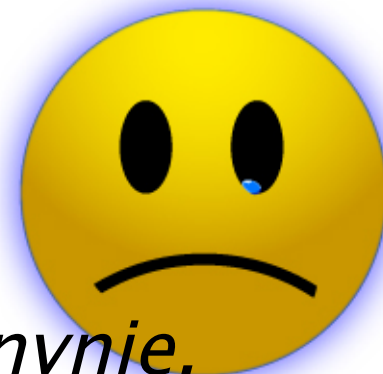

- *grust', melanxolija, pečal', toska, unynie, xandra*

- The constructions they appear in:

- *v* + Acc ‘into’
- *v* + Loc ‘in’
- Inst: Agent
- *s* + Inst ‘with’
- *ot* + Gen ‘from’

- (Direct Object)

- (Other Constructions)

Graphs will show only these five,  
as percentages

Hierarchical Cluster Analysis  
is computed from all data

# The 'sadness' nouns

- They can't all be the same:

*Uxodiš', i ja gljažu vsled tebe s  
grust'ju, no bez toski.*

'You leave and I watch you go with  
sadness<sub>grust'</sub>, but without  
sadness<sub>toska</sub>'

- Dictionaries differ on how synonyms are grouped

# 'Sadness' Hierarchical Cluster

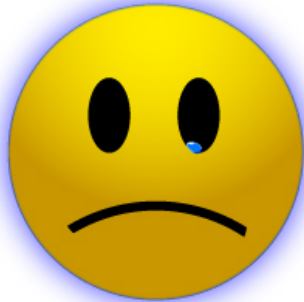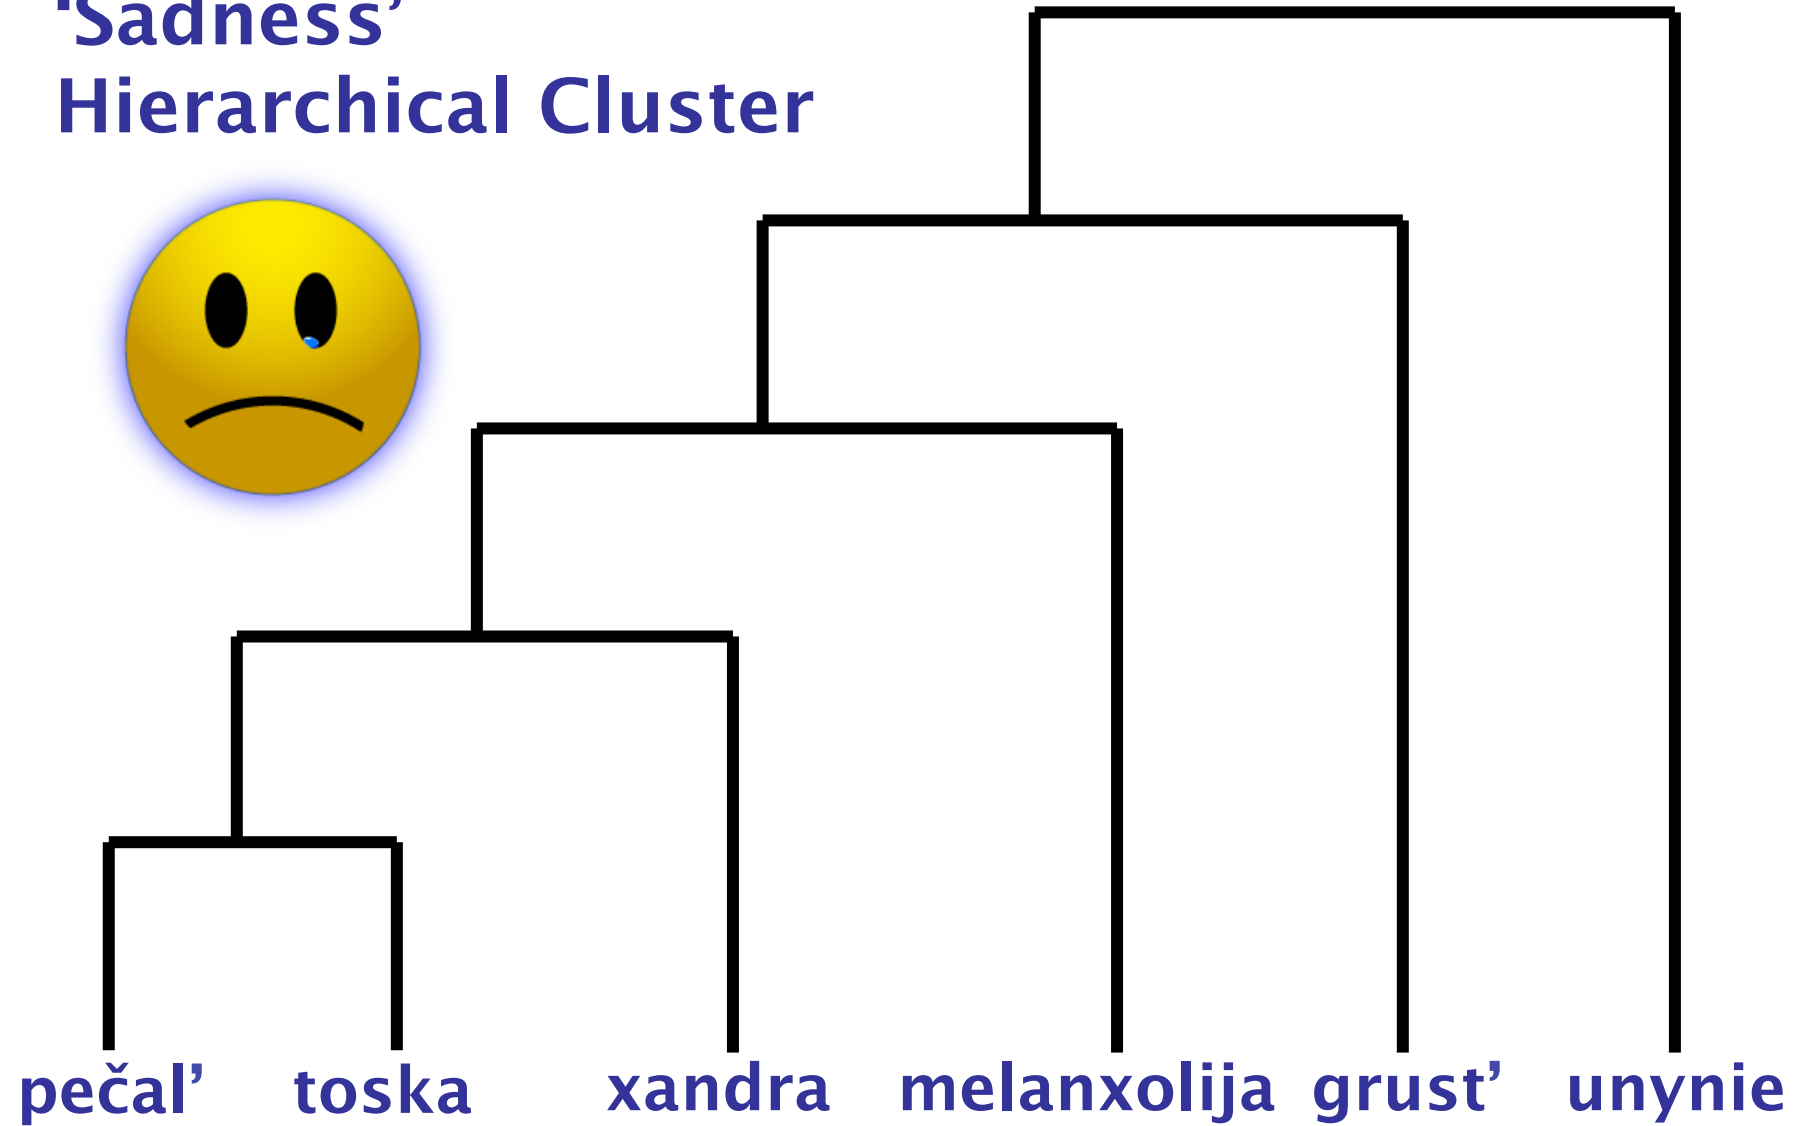

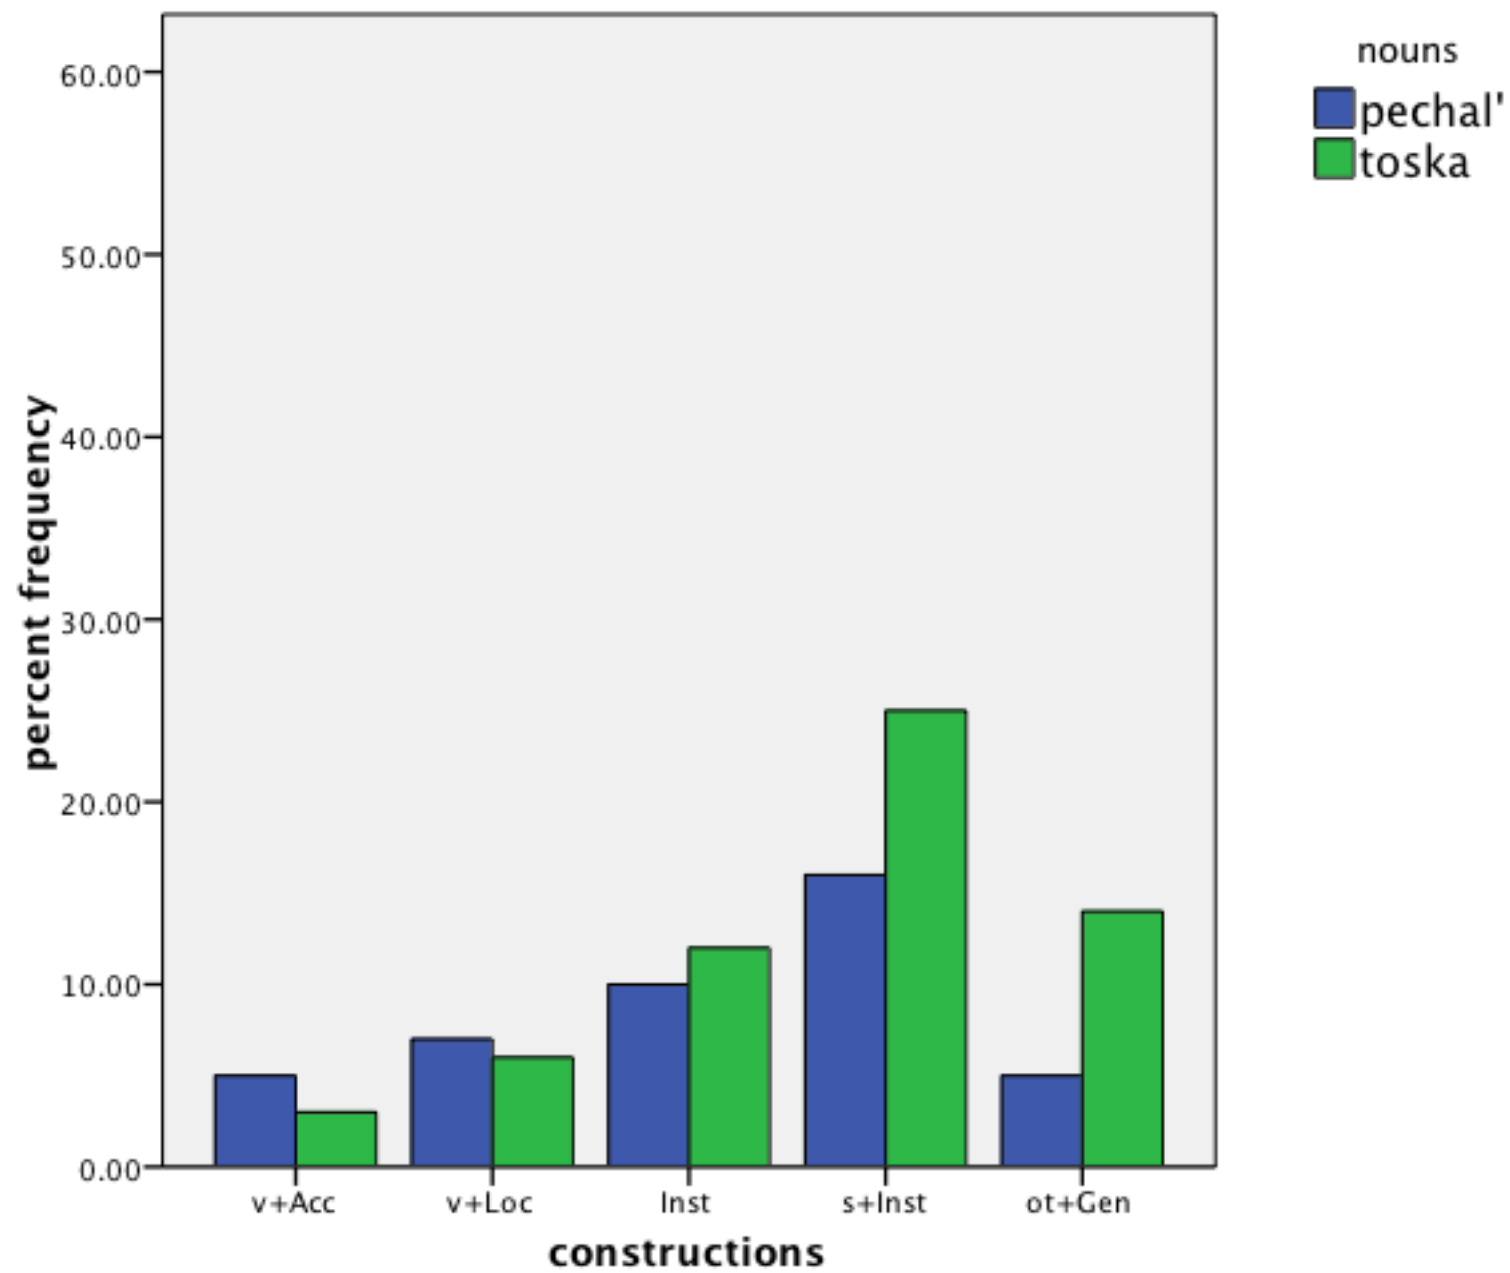

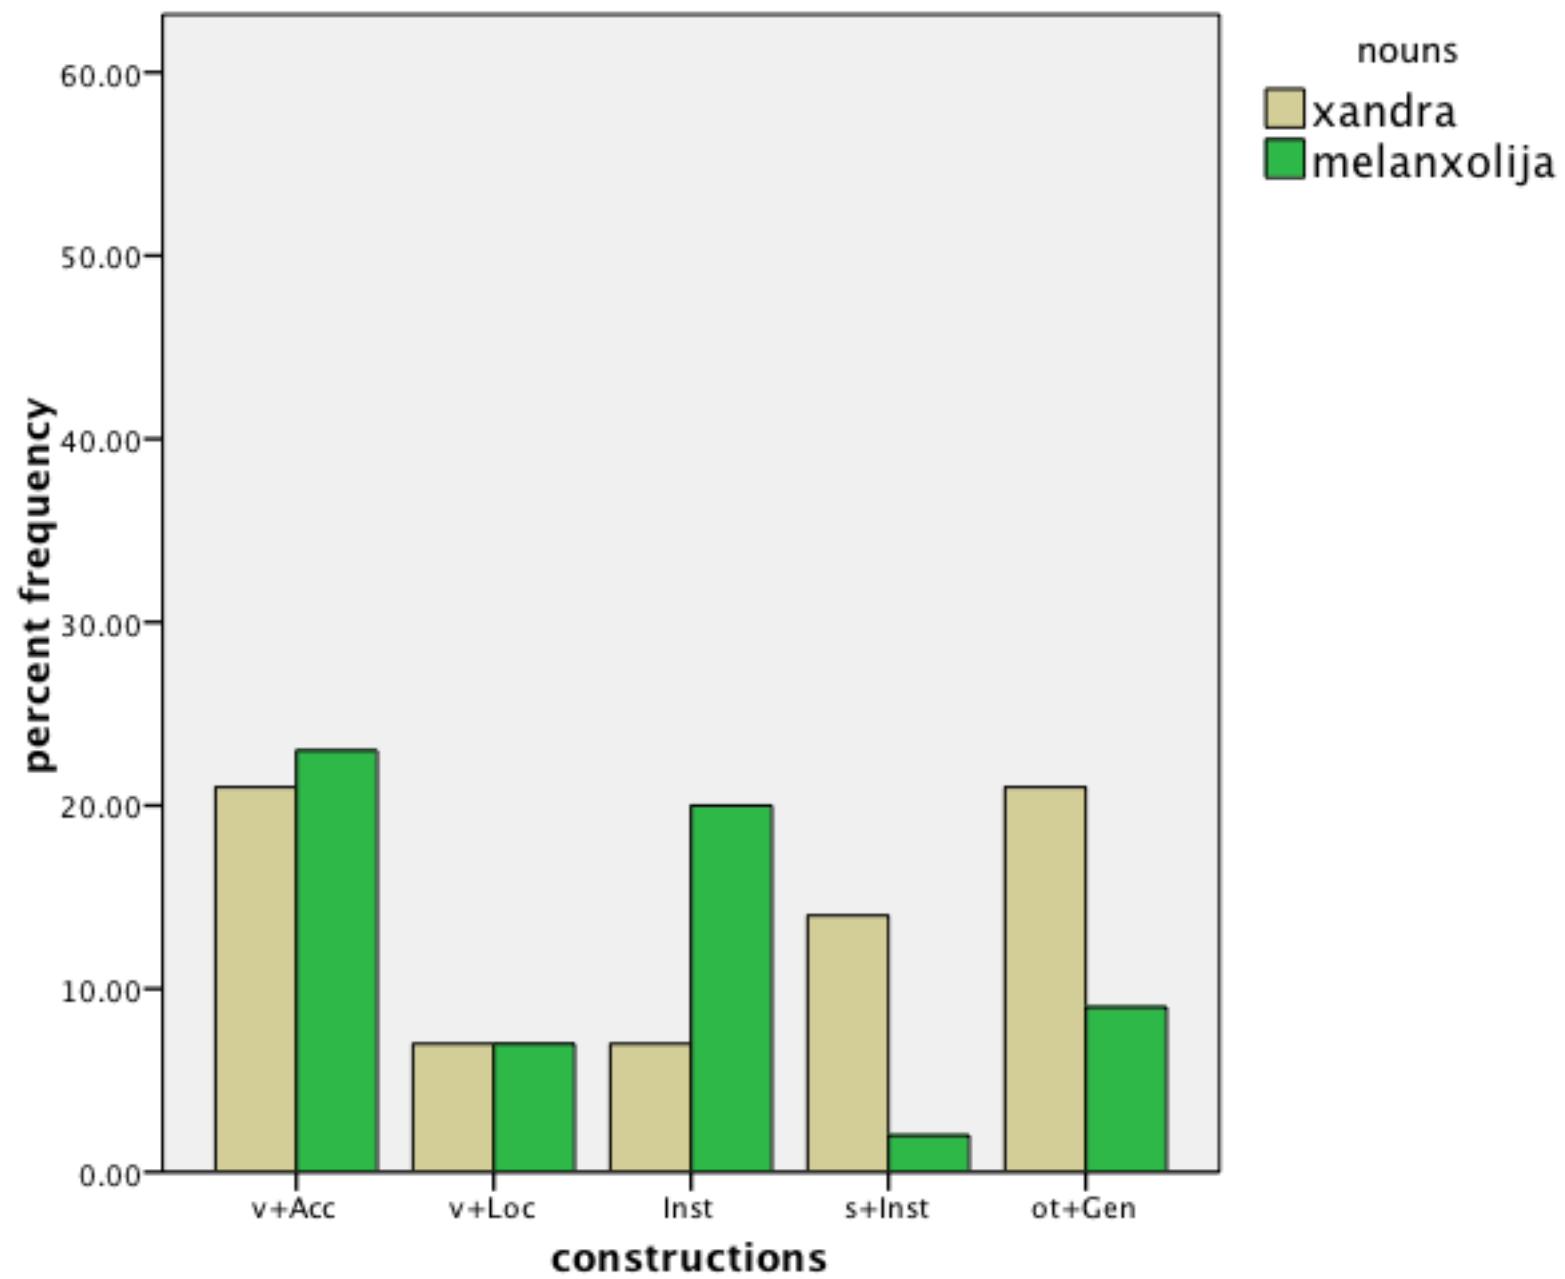

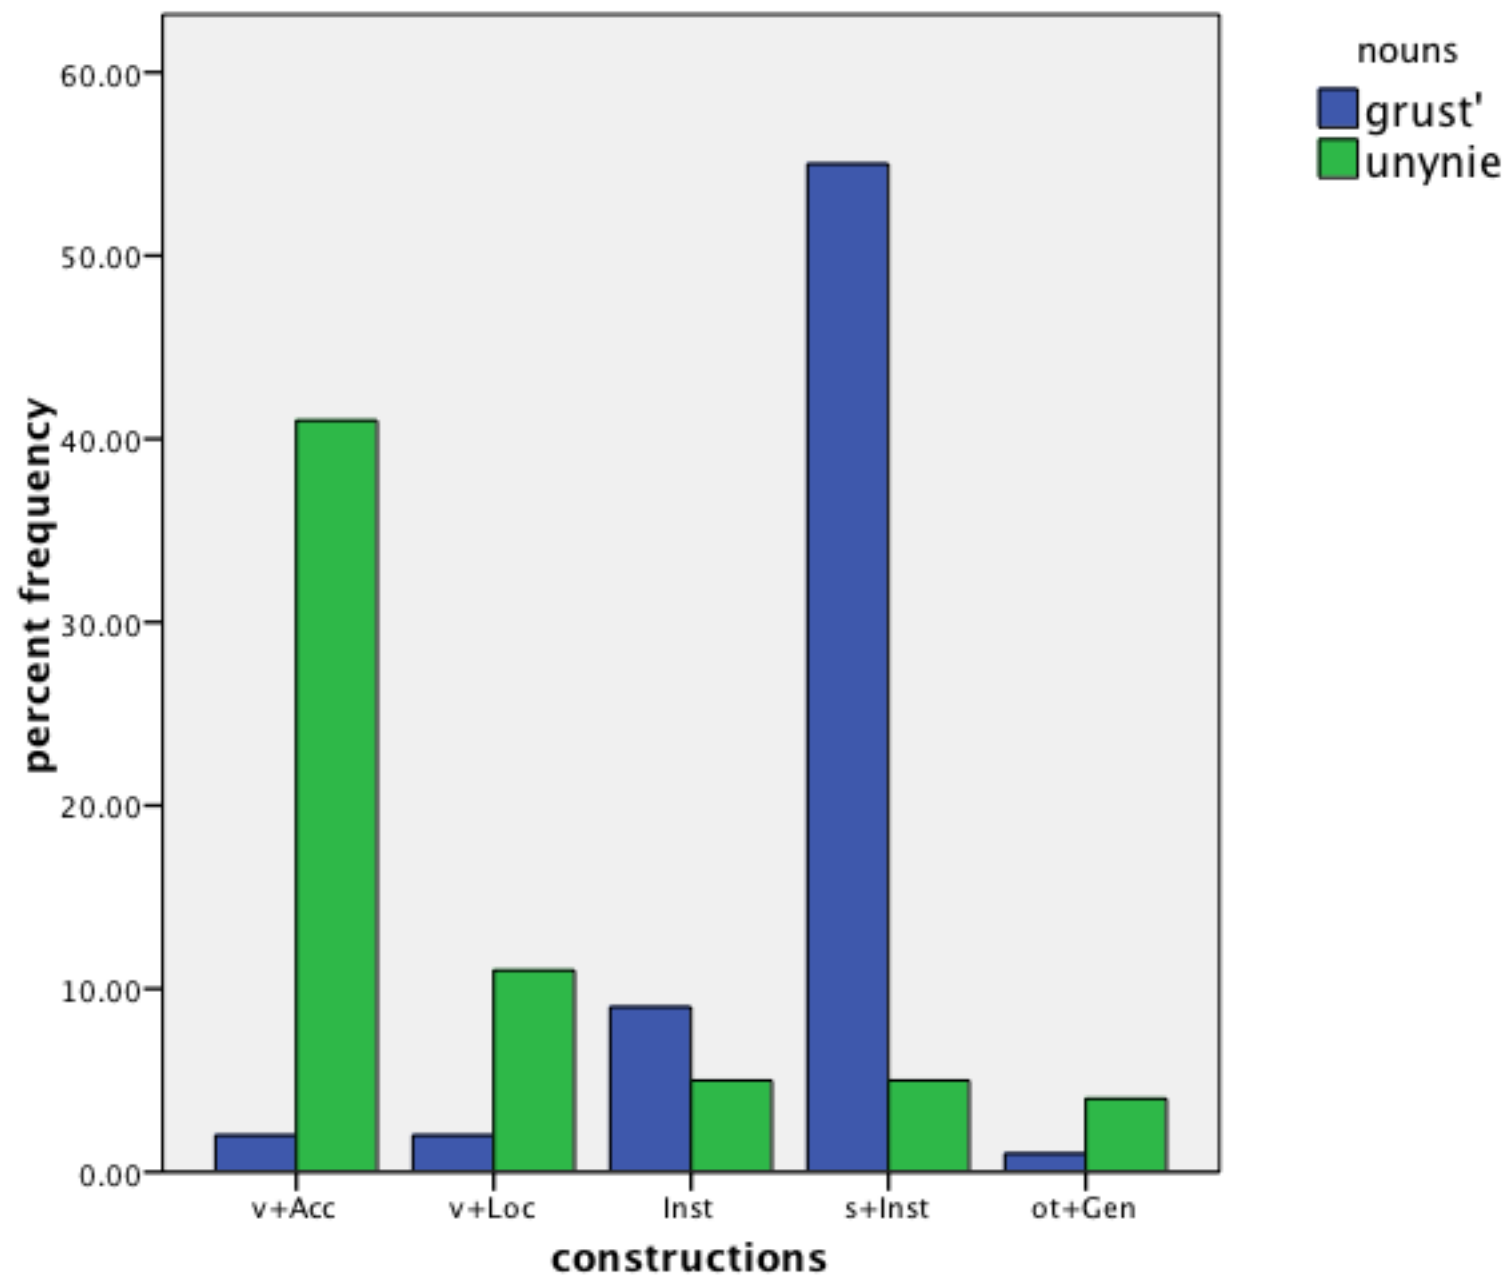

# ‘Happiness’ in Russian

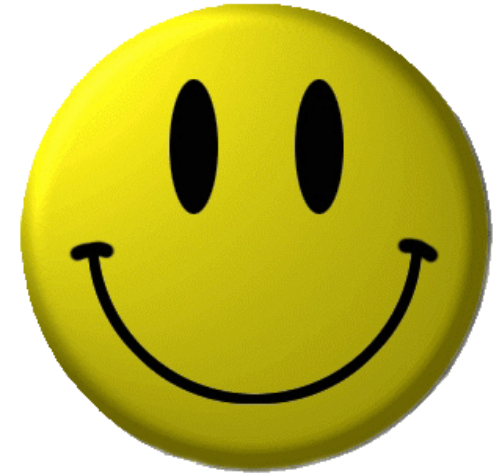

- *likovanie, naslaždenie, radost', sčastie, udovol'stvie, vostorg*
- Antonyms are words that are virtually identical, but differ in one value
- ‘Happiness’ nouns focus on the **same** constructions in their constructional profiles as ‘sadness’ nouns
- Dictionaries differ widely in grouping of ‘happiness’ synonyms

# **'Happiness'** **Hierarchical Cluster**

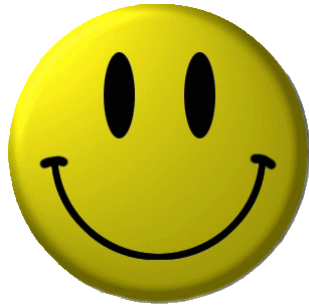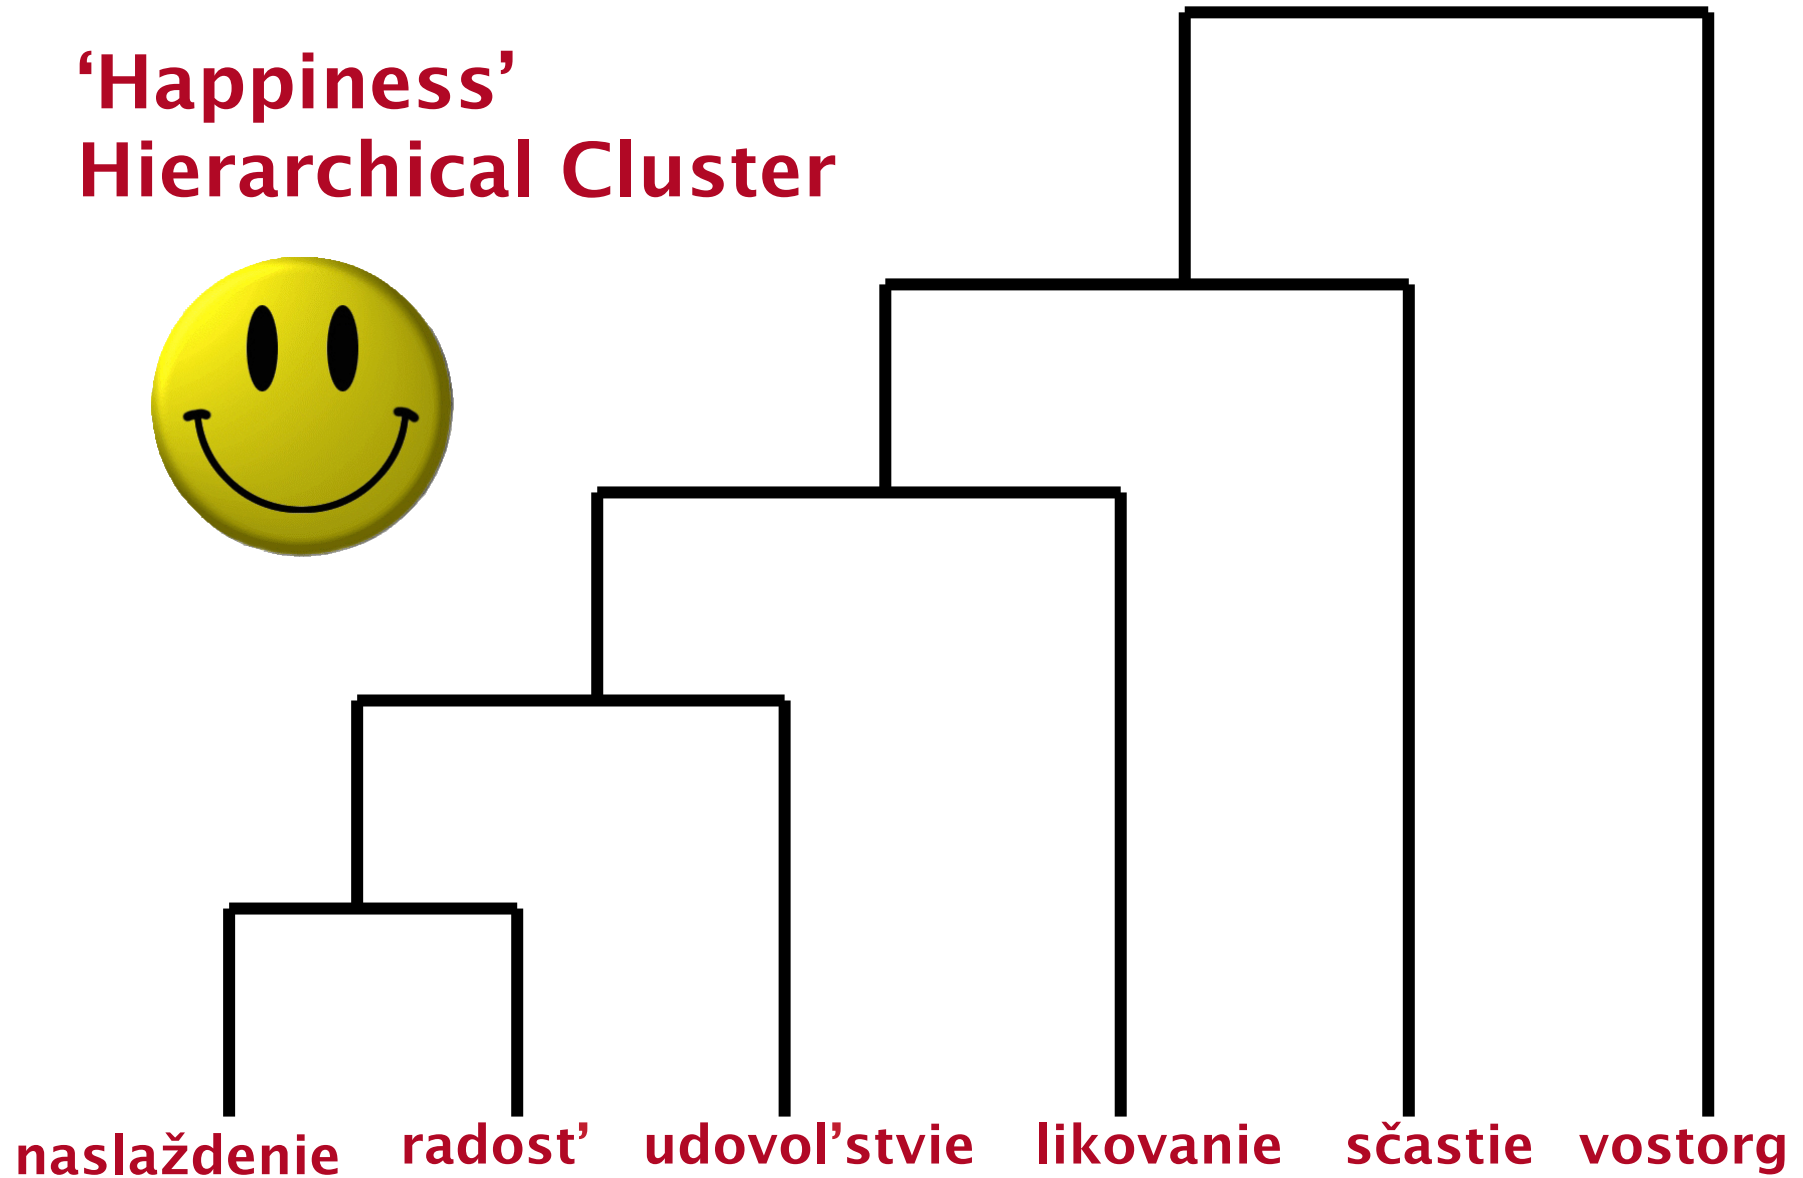

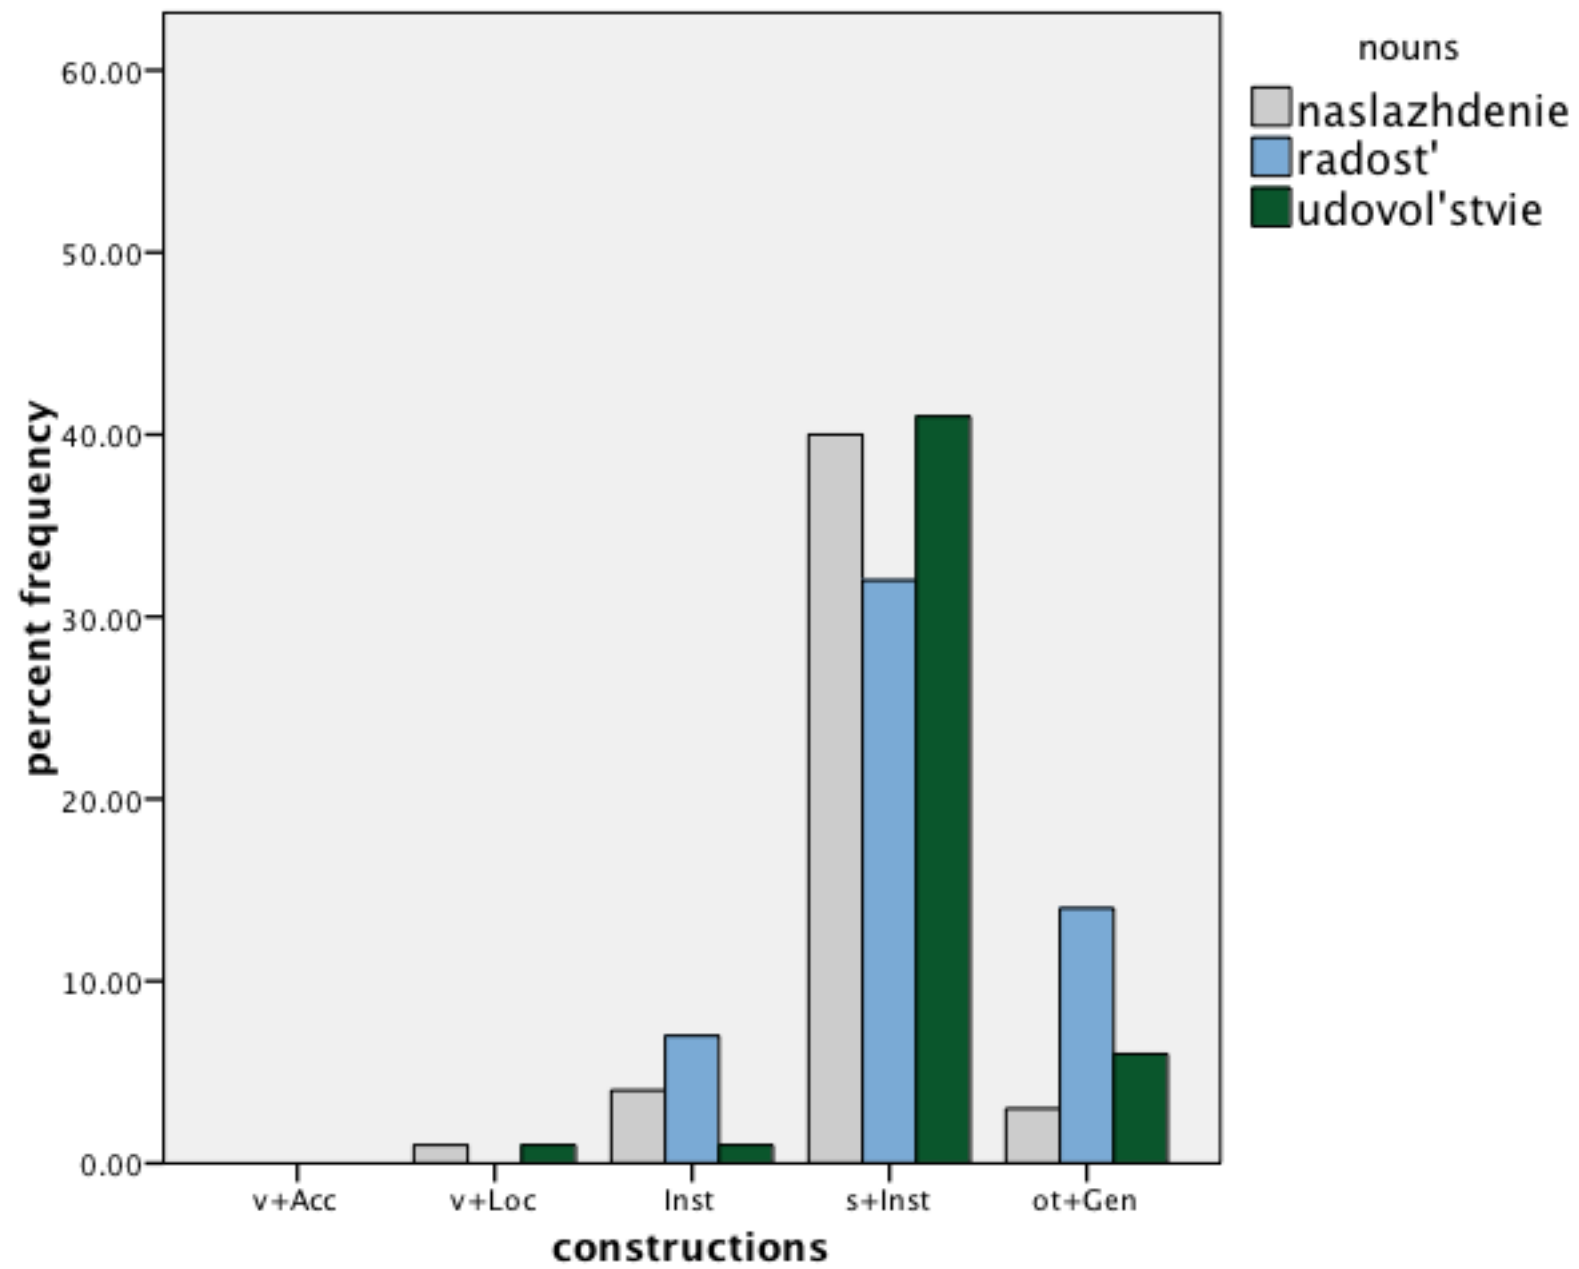

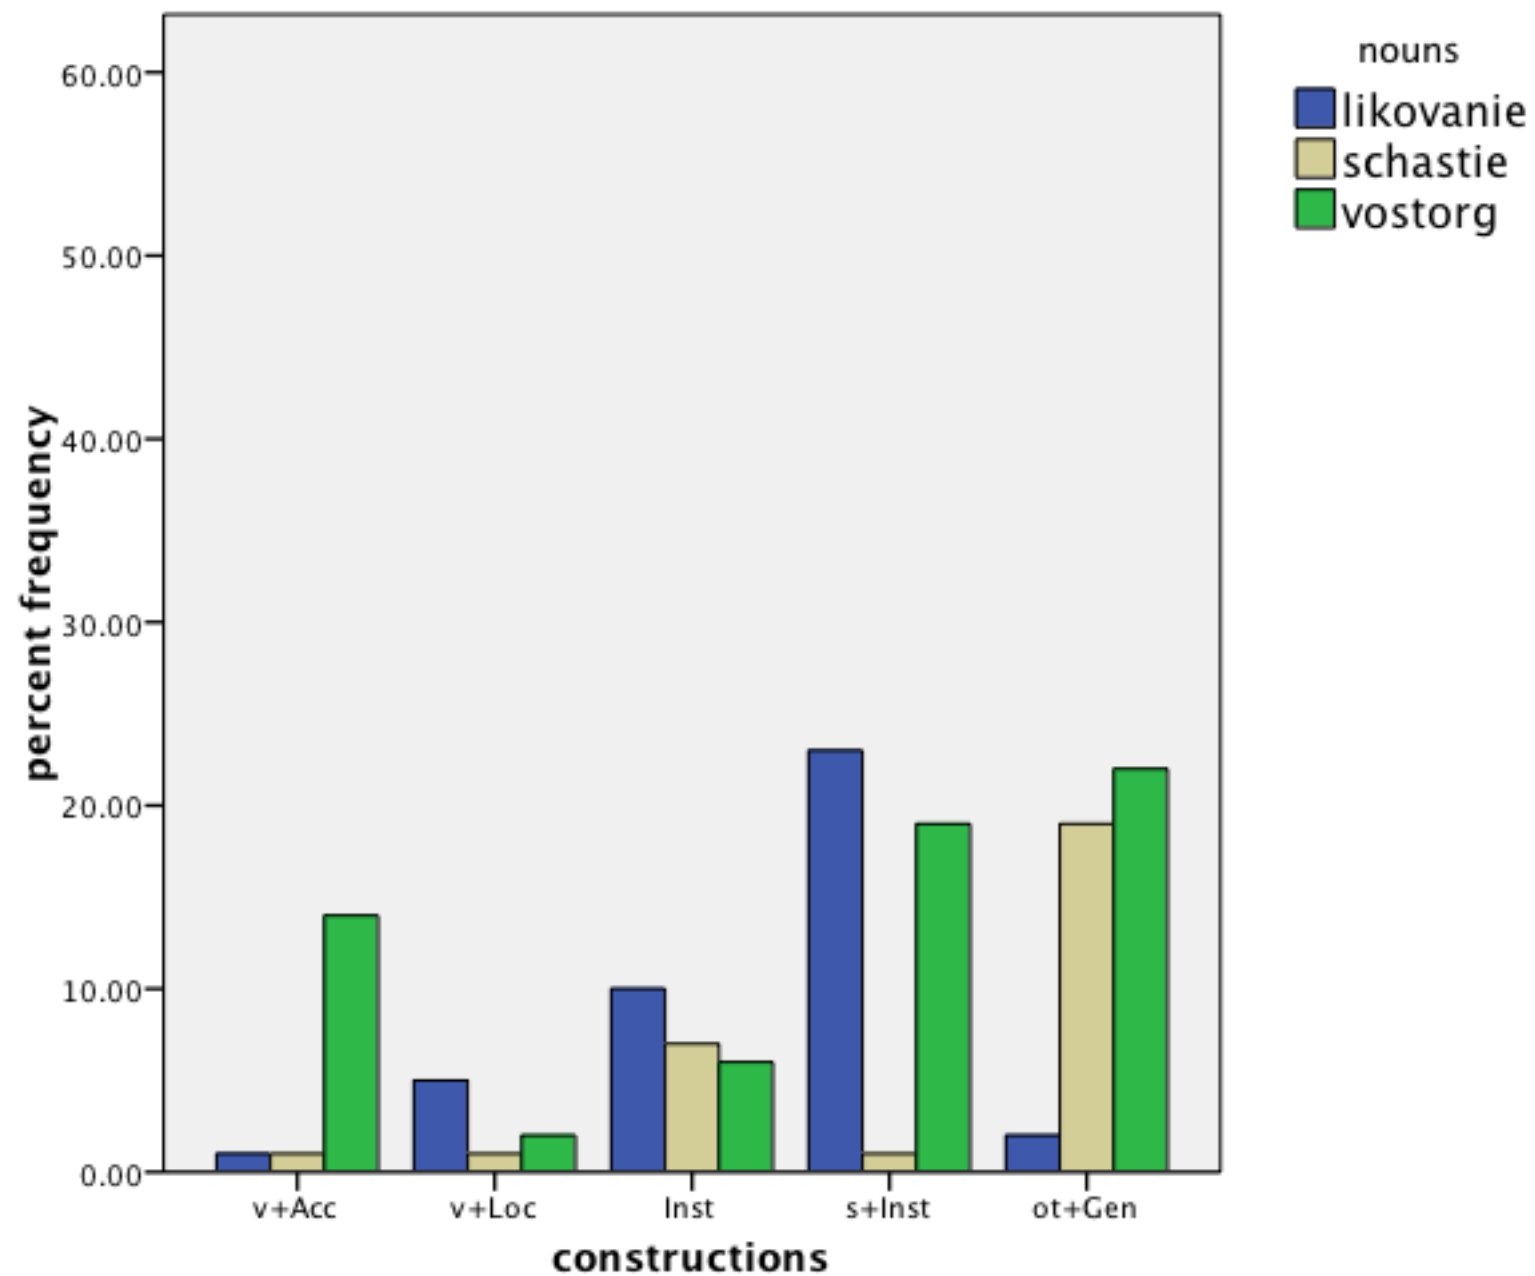

# About the results...

- The results are statistically significant
- For 'sadness' nouns: chi square = 730.35, and Cramer's  $V = 0.305$  which qualifies as a moderate effect ( $p < 0.0001$ ,  $df = 30$ )
- For 'happiness' nouns: chi square = 774.6, Cramer's  $V = 0.268$  which qualifies as a moderate effect ( $p < 0.0001$ ,  $df = 30$ )

# Metaphor

- Constructional profiles reveal that emotions such as happiness and sadness in Russian are understood as
  - **metaphorical** holes or mires
  - **metaphorical** agents
  - **metaphorical** accessories (gestures)
  - **metaphorical** diseases
  - **metaphorical** sources

v + Acc 'into'

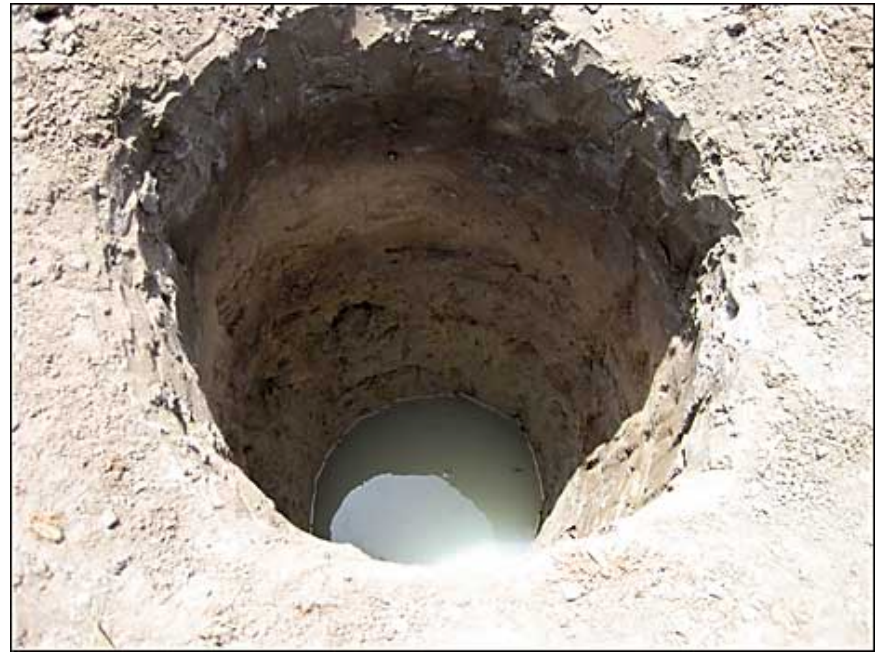

*Ja že živýj človek i, konečno,  
inogda vpadaju v unynie.*

‘I am a living person, and, of  
course, occasionally fall into  
sadness.’

v + Loc 'in'

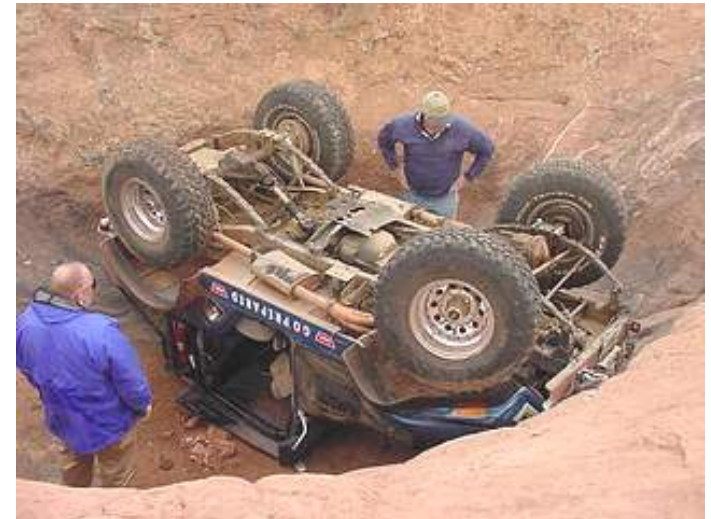

*Ej na um ne pridet, čto suprug  
iznyvaet v toške o poterjannyx  
minutax truda i vdoxnovenija.*

‘It doesn’t occur to her that her  
spouse is suffering in sadness over  
the minutes of work and inspiration  
that he has lost.’

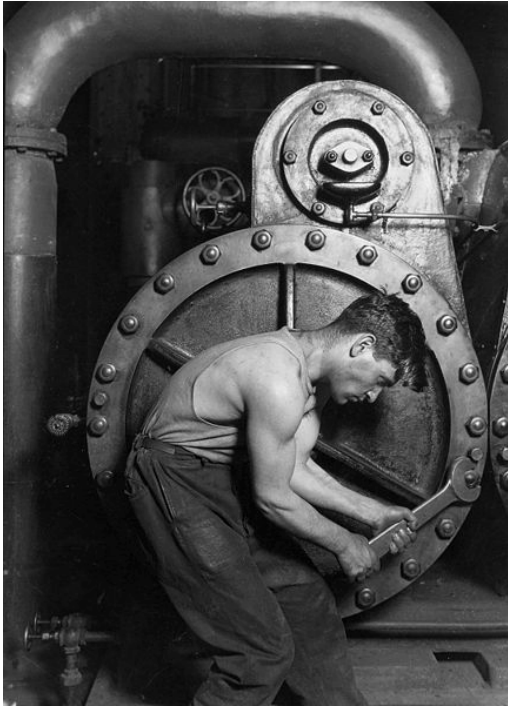

# Inst: Agent

*Kto iz živuščix, tomimyj unyniem,  
ne predavalsja takomu  
pereboru ne sostojavšixsja  
žiznennyx variantov?*

‘Who among mortals tormented  
by sadness, has not indulged in  
an inventory of all the things  
that didn’t happen in their life?’

*s* + Inst 'with'

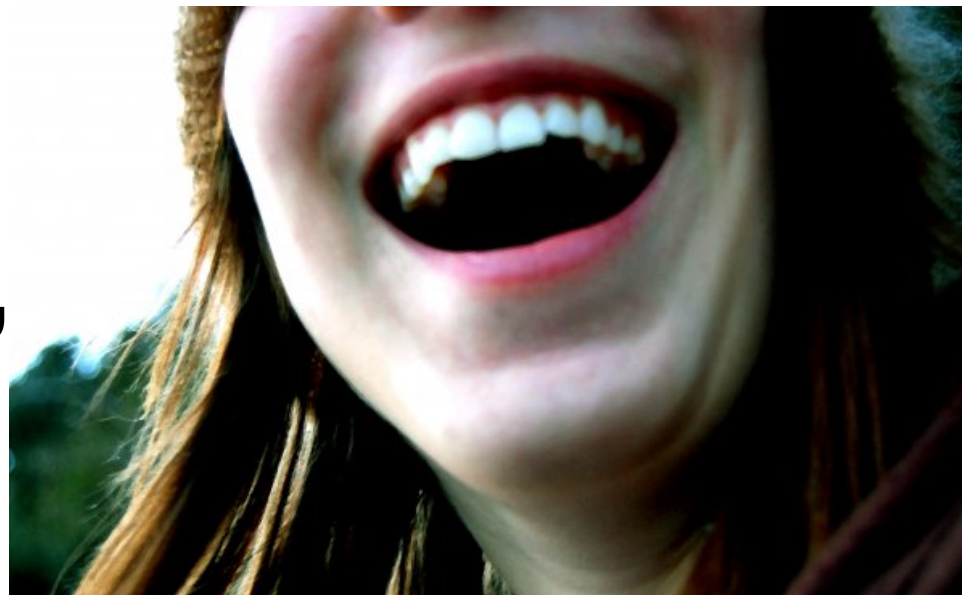

*–Kušaeš' ty, kak svin'ja, – s  
grust'ju skazal kapitan.*

‘--You eat like a pig’-- said  
the captain with sadness.’

*ot* + Gen 'from':  
Healing from disease

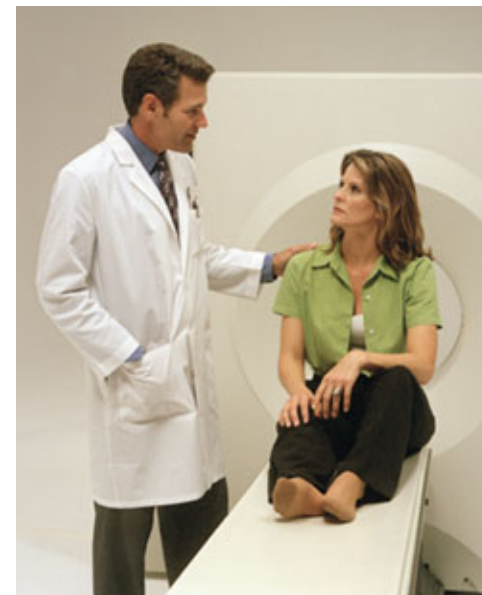

Samoe lučšee lekarstvo ot xandry  
-- èto čtenie.

'The best cure for sadness is  
reading.'

*ot* + Gen  
'from':  
Cause

*Podumajte, ètot  
čelovek umer ot  
melanxolii!*

'Just imagine, that  
person died of  
sadness!'

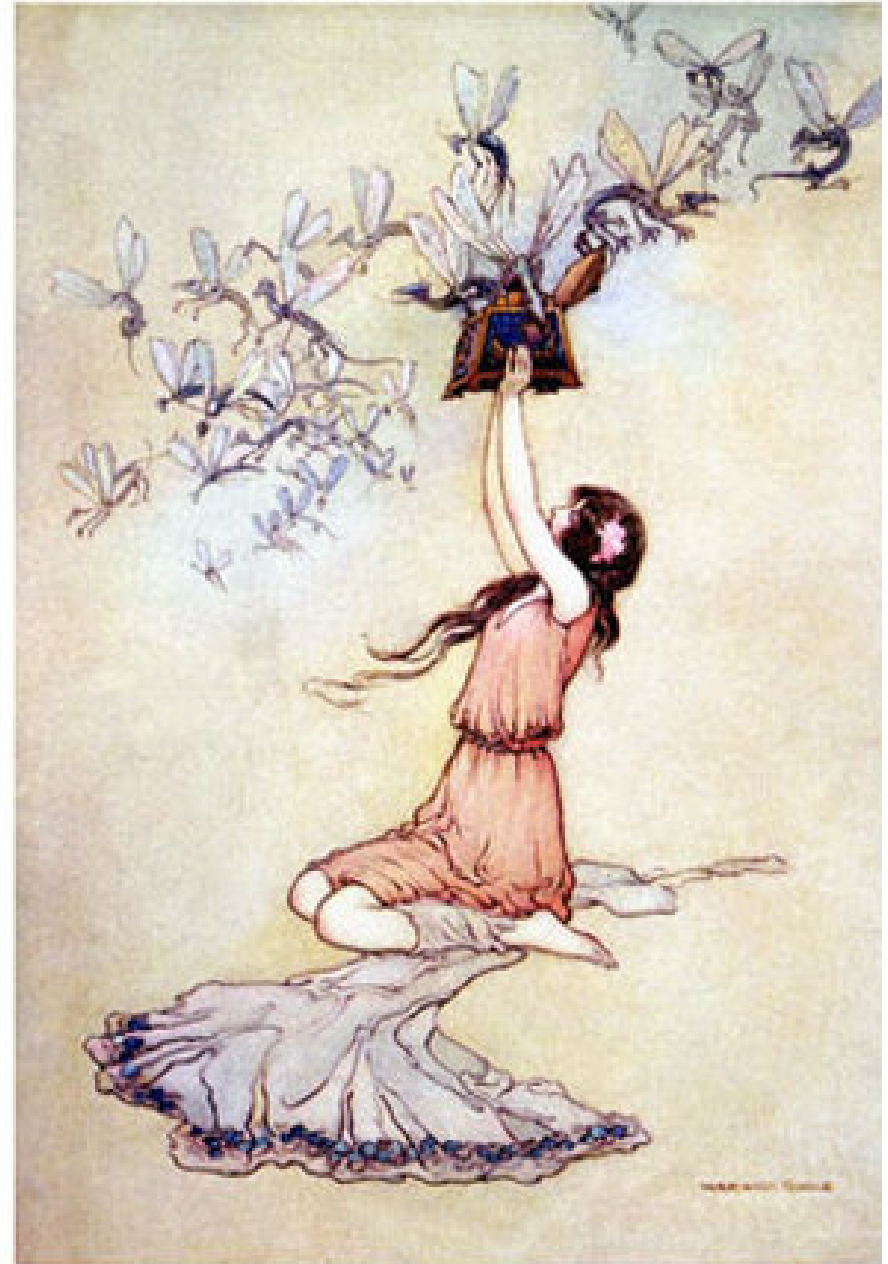

# Constructional Profiles of Verbs

- The distribution of relative frequencies of constructions associated with verbs
- Constructional profiles show that near-synonyms can behave very differently
- Constructional profiles can show that the “empty” prefixes are not really empty

# “Empty” prefixes?

When we have aspectual pairs such as *pisat’/napisat’* ‘write’, *morozit’/zamorozit’* ‘freeze’, *obedat’/poobedat’* ‘eat lunch’, it is assumed that the prefixes *na-*, *za-*, *po-* are “empty” (have no meaning)

Some verbs have several “empty” prefixes: *gruzit’* ‘load’ has the perfectives *nagruzit’*, *zagruzit’*, *pogruzit’* – are they synonyms?

Constructional profiles show that the verbs have different meanings and the prefixes are not empty

# Relevant constructions

- Acc names **load (theme-object)**
  - Acc + *na/v* + Acc (*nagruzit' jaščiki na teležku* 'load the boxes onto the cart')
  - Acc (*zagruzit' ugol' budet problematično* 'it will be difficult to load the coal')
- Acc names **container (goal-object)**
  - Acc + Inst (*on nagruzil sanki proviziej* 'he loaded the sleds with provisions')
  - Acc (*nagruzili telegi i uexali v gorod* 'they loaded the carts and rode into town' )
- Data from Russian National Corpus

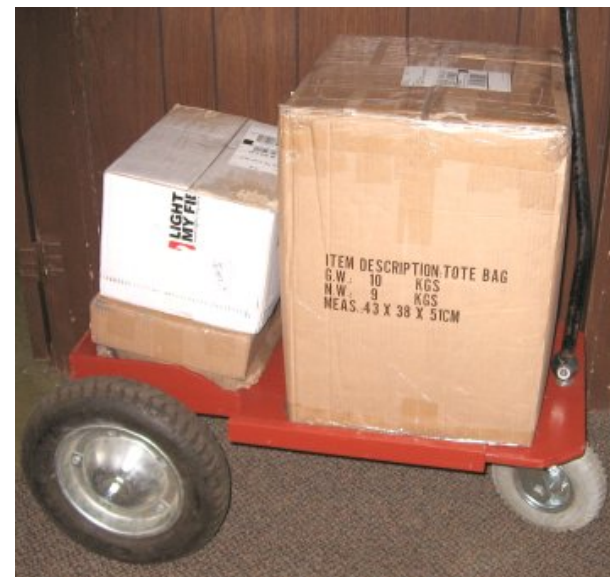

## All non-passive forms

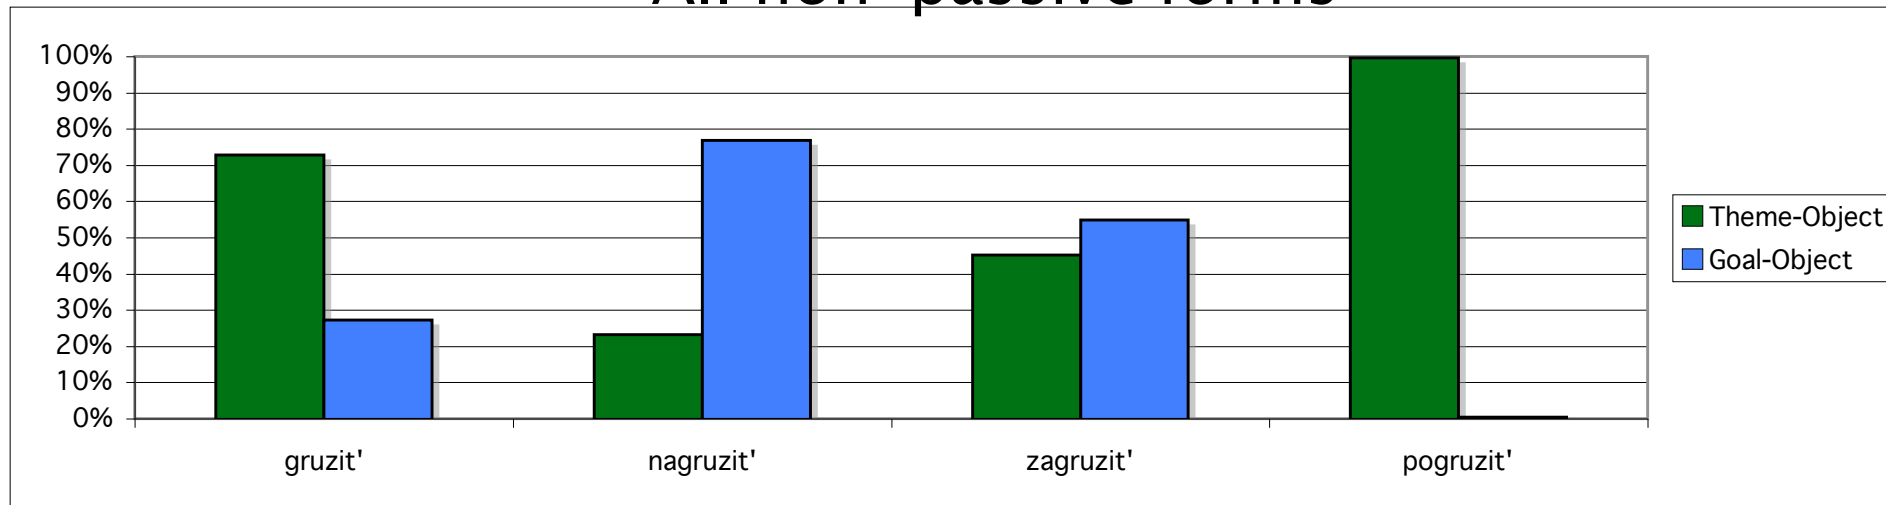

## Past passive participles

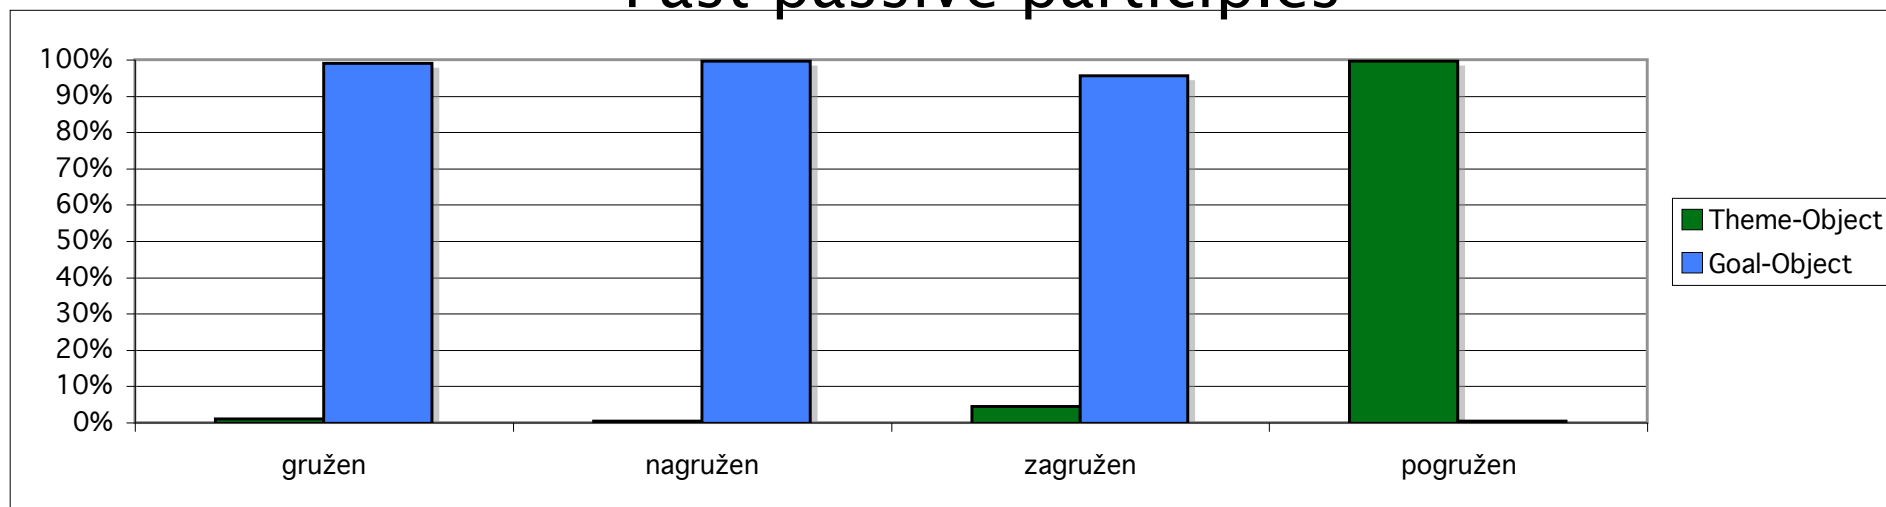

# About the results...

- Logistic regression shows a highly significant relationship between the construction and the following factors:
  - prefix
  - passive vs. active
  - reduced vs. full
- Correlational strength is 0.796
- Classificatory power: 88.5 %  
constructions are predicted correctly
