# Supplementary material
Source: publisher figshare collection journal article supplement (https://brill.figshare.com/articles/dataset/_/7092860)
Supplement: Supplementary file 1 [file 1 › Janda 6. grammatical profiles handout.pdf]

# “Grammatical Profiles: What Inflectional Forms Tell us about Lexicon and Grammar”

Laura A. Janda and Olga Lyashevskaya

## Introduction

What is a Grammatical Profile?

Tense, Aspect and Mood in Russian

## 2 Studies of TAM in Russian

Study 1: prefixes and suffixes

Are pairs formed via both prefixes and suffixes?

Study 2: TAM and outlier verbs

What verbs are most attracted to TAM combinations?

## Conclusion

Perfective vs. imperfective pairs formed with prefixes and suffixes behave the same way

Grammatical “idioms” in interaction of aspect and inflection

## Grammatical Profile =

Relative frequency distribution of the inflected forms of a word in a corpus

## TAM in Russian

Tense: Past vs. Non-Past (imperfective = present, perfective = future)

Aspect: Imperfective vs. Perfective “paired” verbs (residue of biaspectuals)

Mood: Indicative, Infinitives in modal constructions, Imperative

## Study 1: prefixes and suffixes

### Major Patterns of aspectual morphology:

Simplex verbs -- nearly all imperfective (*delat'* ‘do’)

Prefixed verbs (prefix + simplex) -- nearly all perfective (*sdelat'* ‘do’, *peredelat'* ‘redo’)

Prefixed and suffixed verbs (prefix + simplex + suffix) -- secondary imperfectives (*peredelyvat'* ‘redo’)

**p-partners** (Natural Perfectives): simplex & prefixed (*delat'* ‘do’ & *sdelat'* ‘do’)

**s-partners** (Specialized Perfectives): prefixed & prefixed and suffixed (*peredelat'* ‘redo’ & *peredelyvat'* ‘redo’)

Traditional Hypothesis: both p-partners and s-partners form aspectual pairs

Isačenko Hypothesis: only s-partners form aspectual pairs

|                             | Imperfective       |                  |                  |                | Perfective       |                    |                  |                 |
|-----------------------------|--------------------|------------------|------------------|----------------|------------------|--------------------|------------------|-----------------|
|                             | Ipfv_<br>NonPast   | Ipfv_<br>Past    | Ipfv_<br>Inf     | Ipfv_<br>Imper | Pfv_<br>NonPast  | Pfv_<br>Past       | Pfv_<br>Inf      | Pfv_<br>Imper   |
| both p-<br>& s-<br>partners | 1,330,016<br>47.4% | 915,374<br>32.6% | 482,860<br>17.2% | 75,717<br>2.7% | 375,170<br>11.9% | 1,972,287<br>62.7% | 688,317<br>21.9% | 111,509<br>3.5% |

Table 1: Grammatical profiles of imperfective vs. perfective verbs

Statistically significant: chi-squared = 947756, df = 3, p-value < 2.2e-16

With nearly 6M datapoints, too much statistical power

Effect size moderate/large: Cramer’s V = 0.399

(0.1 = small, 0.3 = moderate, 0.5 = large)

In other words, imperfective verbs behave differently than perfective verbs.

|                | Ipfv_<br>NonPast | Ipfv_<br>Past    | Ipfv_<br>Inf     | Ipfv_<br>Imper | Pfv_<br>NonPast  | Pfv_<br>Past       | Pfv_<br>Inf      | Pfv_<br>Imper  |
|----------------|------------------|------------------|------------------|----------------|------------------|--------------------|------------------|----------------|
| p-<br>partners | 475,893<br>43%   | 397,409<br>35.9% | 195,926<br>17.7% | 36,427<br>3.3% | 72,439<br>13.7%  | 317,570<br>60.1%   | 114,460<br>21.6% | 24,280<br>4.6% |
| s-<br>partners | 854,123<br>50.3% | 517,965<br>30.5% | 286,934<br>16.9% | 39,290<br>2.3% | 302,731<br>11.6% | 1,654,717<br>63.2% | 573,857<br>21.9% | 87,229<br>3.3% |

Table 2: Grammatical profiles of p-partners vs. s-partners

Imperfectives: chi-squared = 16155.13, df = 3, p-value < 2.2e-16, but Cramer's V = 0.076, **below "small"**

Perfectives: chi-squared = 4365.078, df = 3, p-value < 2.2e-16, but Cramer's V = 0.037, **below "small"**

In other words, p-partners do not behave differently from s-partners, not in terms of imperfectives, nor in terms of perfectives.

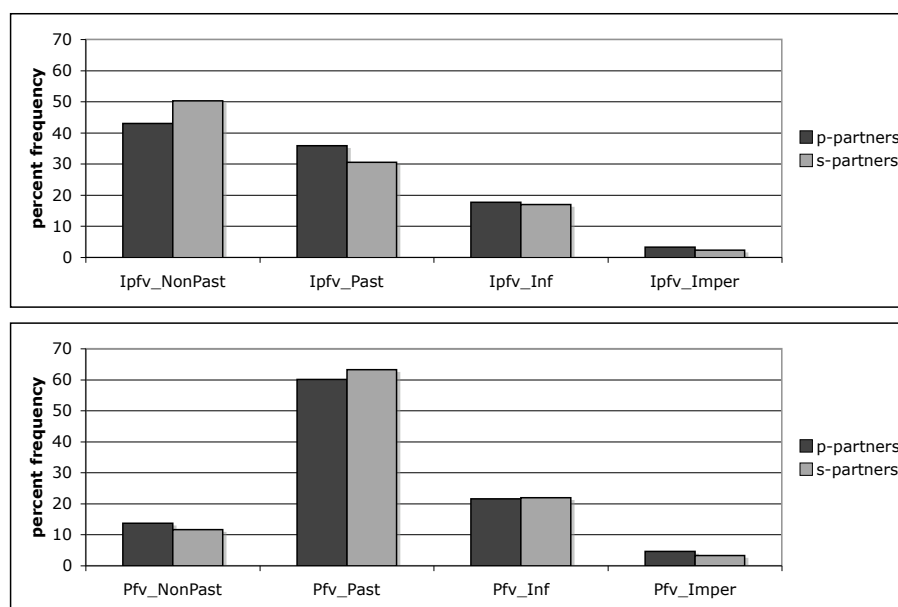

Figure 1: Distribution of of p-partner (dark grey) and s-partner (light grey) forms

## Study 2: outlier verbs

### Imperfective imperative "be doing X!"

Hypothesis:

- categorical negation
- politeness
- insistence (rudeness)

Hypothesis confirmed, but other findings too

Over 200 outliers

- Polite: guest knows what to expect: *razdevajtes* 'take off your coat', *sadites* 'sit down', *prisoedinajtes* 'join in', *zakusyvajte* 'eat a chaser', *zakurivajte* 'have a smoke', *zaezžajte* 'stop by', *zalezajte* 'get into the car'
- Insistence: hearer is hesitant: *stupajte* 'get going', *gljadite* 'look', *zabirajte* 'take'
- Insistence: hearer has not behaved properly (connection with negation): *provalivaj* 'get out of here', *končaj* 'stop', *ne perebivaj* 'don't interrupt', *ne prikidyajsja* 'don't

pretend to be something you aren't', *ne peredergivaj* 'don't distort the facts', *otvalivaj* 'get out of here'

Other findings

- Polite requests: *vyručajte* 'help'
- Kind wishes: *vyzdoravlivajte* 'get well'
- Conventional construction: *davajte* 'let's/let me' (*posmotrim* 'take a look', *pomogu* 'help', *rasskažu* 'tell', *pokažu* 'show', *sdelaju* 'do')
- Idiomatic/culturally anchored: *proščaj(te)* 'farewell', *soedinjajtes* 'unite' (slogan), *obogoščajsja* 'be prosperous' (NEP), *zapevaj* 'sing' (army), *ne pominaj lixom/kak zvali* 'bear no ill will/they just vanished', *spasajsja, kto možet* 'every man for himself', *na čužoj karavaj rot ne razevaj* 'don't take others' belongings'

### Perfective imperative “make X happen!”

Hypothesis

- Rude
- Instructions
- Warnings

Hypothesis confirmed for rude and instructions, but not for warnings, and there are other findings too

Over 300 outliers

- Rude: *otstan* 'leave me alone', *otpusis* 'let me go', *perestan* 'stop it'
- Instructions: (cooking) *vskipjatite* 'boil', (exercising) *sognite* 'bend', (official transactions) *raspišites* 'sign for', (text instructions) *rassmotrite* [grafik x] 'see [figure x]'
- Additional findings
- Polite expressions: *izvinite* 'excuse me', *poterpite* 'please be patient', *predstav'te* 'imagine'
- Attention-directing: *posmotrite* 'look at', *vslušajtes* 'listen to', *ponjuxajte* 'sniff', *ugadajte* 'guess'
- Discourse markers: *požaluj* 'perhaps', *razrešite* 'allow', *podskazite* 'prompt, tell', *uvol'te* 'spare'
- Religious: *Gospodi pomiluj* 'Lord have mercy', *blagoslovi otče* 'Father bless'
- Conventional construction: *dajte* 'let me' (*poceluju* 'kiss', *posmotrju* 'take a look', *vzgljanu* 'take a peek')
- Idioms: *xot* 'zalejsja/zavalis' 'a very large amount', *ne razlej voda* 'really close friends', *čert razderi* 'to hell with it'

### Imperfective non-past “is doing X”

Hypothesis

- On-going processes
- Concrete processes with a duration
- Simultaneous processes
- Repeated actions

Hypothesis NOT confirmed – gnomic situations instead

| verb (3sg)                                              | gloss               | raw freq | % freq |
|---------------------------------------------------------|---------------------|----------|--------|
| <i>javljat'sja</i> ( <i>javljaetsja</i> )               | 'be'                | 39543    | 92%    |
| <i>okazyvat'sja</i> ( <i>okazyvaetsja</i> )             | 'turn out to be'    | 10869    | 85%    |
| <i>podtverždat'sja</i> ( <i>podtverždaetsja</i> )       | 'be confirmed'      | 677      | 83%    |
| <i>vyjasnjat'sja</i> ( <i>vyjasnjaetsja</i> )           | 'be explained'      | 805      | 89%    |
| <i>kasat'sja</i> ( <i>kasaetsja</i> )                   | 'concern'           | 9719     | 87%    |
| <i>isčerpyvat</i> ( <i>isčerpyvaet</i> )                | 'exhaust'           | 100      | 89%    |
| <i>predopredeljat'sja</i> ( <i>predopredeljaetsja</i> ) | 'be predetermined'  | 34       | 85%    |
| <i>objazyvat'sja</i> ( <i>objazyvaetsja</i> )           | 'be obliged to'     | 480      | 92%    |
| <i>zatrudnjat'sja</i> ( <i>zatrudnjaetsja</i> )         | 'be made difficult' | 275      | 86%    |
| <i>vleč</i> ( <i>vlečet</i> )                           | 'entail'            | 1555     | 85%    |

|                                   |        |   |    |
|-----------------------------------|--------|---|----|
| <i>slyxat'</i> ( <i>slyxaet</i> ) | 'hear' | 1 | 0% |
|-----------------------------------|--------|---|----|

Table 3: Imperfective verbs with very high or low incidence of non-past forms

10+1 outlier verbs (*slyxat'* 'hear' lacks non-past)

10 used in gnomic constructions:

- *diskussija vseгда javljaetsja naibolee produktivnoj formoj naučnogo obsuždenija problemy* 'a discussion is always the most productive form for scholarly debate on an issue'
- *dannoe obstojatel'stvo vlečet za soboj negativnye posledstvija* 'this situation entails negative consequences for the clients'
- *okazyvaetsja* 'turns out to be'; *vyjasnjaetsja, čto* 'it turns out that'; *čto kasaetsja* 'as far as X is concerned'; *storony objazujutsja* 'the parties are obliged to'; *zatrudnjajus' otvetit'* 'not sure'

### Perfective non-past "will get X done"

Hypothesis

- Predicted actions
- Promised actions

Hypothesis is confirmed, but there are other findings too

84 outlier verbs

- Predictions: *prevysit* 'will exceed', *umen'sitsja* 'will decrease', *prodlitsja* 'will last', *naladitsja* 'will work out well', *vyzdoroveet* 'will get well', *zatrudnit* 'will make things difficult', *razoritsja* 'will go broke', *potrebuetsja* 'will be necessary', *podoxnet* 'will die', *pridetsja* 'will be necessary', *(ne) obojdetsja (bez)* 'will (not) manage (without)'
- Promises: *upravitsja* 'will take care of something', *postaraetsja* 'will try', *rasterzaet* 'will tear to pieces', *prokljanet* 'will curse'
- Performatives: *osmeljus'* 'I will take the liberty of', *procitiruju* 'I quote'
- Idioms: *ne pridereš'sja* 'don't find fault with', *ostal'noe priložitsja* 'the rest will come', *ot tebe ne ubudet* 'nothing is going to happen to you', *vragu ne poželaeš* 'I wouldn't wish it on my worst enemy'

### Imperfective infinitive "to be Xing"

2 hypotheses

- Šmelev & Zaliznjak (2006): Imperfective used when action is controllable
- Divjak (2009): Imperfective has generic interpretation

Divjak's hypothesis is confirmed

| verb                  | gloss                             | raw freq | % freq |
|-----------------------|-----------------------------------|----------|--------|
| <i>plevat'</i>        | 'spit'                            | 900      | 65%    |
| <i>vvjazjvat'sja</i>  | 'get mixed up in'                 | 124      | 66%    |
| <i>izyskivat'</i>     | 'search out, try to find'         | 92       | 64%    |
| <i>ispravljat'</i>    | 'repair, carry out'               | 283      | 61%    |
| <i>peredelyvat'</i>   | 'redo, alter'                     | 230      | 57%    |
| <i>peresmatrivat'</i> | 'revise, reconsider'              | 198      | 66%    |
| <i>razvivat'</i>      | 'develop'                         | 1363     | 57%    |
| <i>razmeščat'</i>     | 'place, distribute'               | 272      | 58%    |
| <i>raspoznavat'</i>   | 'recognize, identify'             | 113      | 59%    |
| <i>sobljudat'</i>     | 'observe, conform to'             | 1013     | 60%    |
| <i>soglasovyvat'</i>  | 'conform to, agree with'          | 176      | 63%    |
| <i>učityvat'</i>      | 'take into account, bear in mind' | 1850     | 66%    |

Table 4: Imperfective verbs with very high incidence of infinitive forms

12 outlier verbs

- 1 is idiomatic: *mne plevat'* 'I don't give a damn'
- Others used in modal constructions

- Our data supports Divjak
- outlier verbs include uncontrollable actions: *vvjazyvati'sja* 'get mixed up in', *raspoznavati* 'recognize, identify', *soglasovyvat* 'conform to, agree with'
- outlier verbs target conformist behavior: *sobljudati* 'conform to', *peredelyvat* 'redo', *ispravljati* 'repair', *učityvat* 'take into account'

### Perfective infinitive “to get X done”

2 hypotheses

- Smelev & Zaliznjak (2006): Perfective used when action is controllable
- Divjak (2009): Perfective has specific interpretation; also used with “tentative verbs”, *čtoby* ‘in order to’ construction and adverbs describing difficulty/importance of achieving X

Divjak’s hypothesis is confirmed

| verb                | gloss                        | raw freq | % freq |
|---------------------|------------------------------|----------|--------|
| <i>naplevat</i>     | ‘spit’                       | 860      | 89%    |
| <i>sovmestit</i>    | ‘combine’                    | 385      | 87%    |
| <i>predotvratit</i> | ‘prevent’                    | 792      | 86%    |
| <i>vossozdat</i>    | ‘reconstruct’                | 248      | 84%    |
| <i>pomyslit</i>     | ‘contemplate’                | 129      | 84%    |
| <i>sobljusti</i>    | ‘observe, conform to’        | 200      | 84%    |
| <i>sootnesti</i>    | ‘correlate’                  | 118      | 84%    |
| <i>vozmostit</i>    | ‘compensate’                 | 304      | 83%    |
| <i>vospolnit</i>    | ‘fill in’                    | 171      | 80%    |
| <i>podrabotat</i>   | ‘earn additionally, work up’ | 91       | 80%    |
| <i>srazit'sja</i>   | ‘fight, join in battle with’ | 108      | 80%    |
| <i>ustranit</i>     | ‘remove’                     | 686      | 80%    |

Table 5: Perfective verbs with very high incidence of infinitive forms

12 outlier verbs (*mne naplevat* ‘I don’t give a damn’)

- Modal uses for specific situations
- Tentative verbs:
  - *Poètomu my popytaemsja vospolnit' ètot probel, opirajas' na fakty i cifry.* ‘That is why we are trying to fill in that gap, relying on facts and figures.’
- *Čtoby* ‘in order to’ construction:
  - *Posle zanjatija možno vypit' vody, čtoby vospolnit' ee poterju.* ‘After working one can drink some water in order to make up for its loss.’
- Adverbs describing difficulty/importance
  - *Fruktami istinnyj deficit kalija vospolnit' očen' tjaželo, praktičeski nevozmožno.* ‘It is very difficult, practically impossible, to make up for a real calcium deficit by [eating] fruit.’

### Imperfective past “was X-ing”

Hypothesis

- Durative past actions
- Repeated past actions

Hypothesis is confirmed, but there are other findings too

| verb                                    | gloss                   | raw freq | % freq |
|-----------------------------------------|-------------------------|----------|--------|
| <i>slyxat</i> ( <i>slyxal</i> )         | ‘hear’                  | 1161     | 93%    |
| <i>slyt</i> ( <i>slyl</i> )             | ‘have a reputation for’ | 212      | 72%    |
| <i>prosiživat</i> ( <i>prosižival</i> ) | ‘sit up repeatedly’     | 123      | 67%    |

|                                                |                       |     |     |
|------------------------------------------------|-----------------------|-----|-----|
| <i>proxazivat'sja</i> ( <i>proxazivalsja</i> ) | 'go for strolls'      | 207 | 69% |
| <i>belet' (belel)</i>                          | 'show white'          | 366 | 70% |
| <i>mračnet' (mračnel)</i>                      | 'show dark, glower'   | 99  | 75% |
| <i>černet' (černel)</i>                        | 'show black'          | 348 | 75% |
| <i>svešivat'sja</i> ( <i>svešivalsja</i> )     | 'hang, dangle'        | 105 | 74% |
| <i>nadvigat'sja</i> ( <i>nadvigalsja</i> )     | 'be approaching'      | 260 | 66% |
| <i>pomyšljat' (pomyšljaj)</i>                  | 'think, dream of'     | 189 | 69% |
| <i>unimat'sja</i> ( <i>unimalsja</i> )         | 'be stoppable'        | 381 | 82% |
| <i>ščurit'sja</i> ( <i>ščurilsja</i> )         | 'squint'              | 196 | 67% |
| <i>otšučivat'sja</i> ( <i>otšučivalsja</i> )   | 'make joking replies' | 80  | 74% |

Table 6: Imperfective verbs with very high incidence of past tense forms

13 outlier verbs

- Evidentials: *slyxal, slyl* 'heard'
- Defective paradigms: 10 of these verbs have no imperative
- Narration of observations: *belel* 'showed white', *černel* 'showed black', *mračnel* 'showed dark', *svešivalsja* 'hung, dangled'
- Negation for categorical statements: *ne pomyšljaj* 'not thought about, dreamt of', *ne unimalsja* 'there was no stopping X'
- Behaviors accompanying dialog: *ščurilsja* 'squinted', *otšučivalsja* 'made joking replies', *mračnel* 'glowered'

### Perfective past “Xed, got X done”

no outlier verbs

### Conclusions

- Aspectual pairs behave similarly, regardless of whether they are formed via suffixation or prefixation
  - It may be that meanings of prefixes and verbs overlap
- Outlier verbs support some previous scholarship, but also present new insights and challenges
- Imperfective imperative
  - extend list of typical polite and rude expressions; added familiar uses
- Perfective imperative
  - new details on rude and neutral uses; added polite uses and use for attention-directing
- Imperfective non-past
  - gnomic reference (instead of ongoing-durative)
- Perfective non-past
  - predictions of improvements/problems, threats, promises, performatives
- Imperfective & Perfective infinitive
  - Mainly modal uses
  - Imperfective infinitives express generic circumstances
  - Perfective infinitives express specific situations (both circumstances and physical necessity/capacity); constructions with tentative verbs, adverbs, *čtoby* 'in order to'
- Imperfective past
  - evidentials, habituals, narration of observations

### Impact

- **Better linguistic analysis**
- **Pedagogical applications**

## Works Cited

- Aikhenvald, Alexandra Y. 2003. Evidentiality in typological perspective. In A. Y. Aikhenvald & R. M. W. Dixon (eds.), *Studies in evidentiality. Typological studies in language (Vol. 54)*, 33-62. Amsterdam: John Benjamins Publishing Company.
- Apresjan, Jurij D. 2004. Interpretacionnye glagoly. *Russkij jazyk v naučnom osveščanii* 7. 5-22.
- Baayen, Harald. 2008. *Analyzing Linguistic Data*. Cambridge: Cambridge University Press.
- Barentsen, Adrian. 2006. K voprosu o vidovoj opozicii v konsrukcijskix tipa *daj pomogu - davaj pomogu*. In: Volkma Lehmann (ed.), *Glagol'nyj vid i leksikografija*, 37-66. Munich: Otto Sagner.
- Binnick, Robert I. 1991. *Time and the Verb*. Oxford: Oxford University Press.
- Bondarko, Aleksandr V. 1983. *Principy funkcional'noj grammatiki i voprosy aspektologii*. Leningrad: Nauka.
- Bondarko, Aleksandr V., Lev L. Bulanin. 1967. *Russkij glagol*. Leningrad: Prosveščenie.
- Bybee, Joan L., Revere Perkins, and William Pagliuca. 1994. *The Evolution of Grammar: Tense, Aspect, and Modality in the Languages of the World*. University of Chicago Press.
- Čertkova, Marina Ju. 1996. *Grammatičeskaja kategorija vida v sovremennom russkom jazyke*. Moscow: Moscow State University.
- Chung, Sandra and Alan Timberlake. 1985. Tense, aspect, and mood. In Timothy Shopen (ed.), *Language typology and syntactic description, Volume III: Grammatical categories and the lexicon*, 202-258. Cambridge: Cambridge University Press.
- Cohen, Jacob. 1988. *Statistical Power Analysis for the Behavioral Sciences*. Mahwah, New Jersey/London: Lawrence Earlbaum Associates.
- Cohen, Jacob, Patricia Cohen, Stephen G. West and Leona S. Aiken. 2003. *Applied Multiple Regression/Correlation Analysis for the Behavioral Sciences*. Mahwah, New Jersey/London: Lawrence Earlbaum Associates.
- Comrie, Bernard. 1976. *Aspect*. Cambridge: Cambridge University Press.
- Cubberly, Paul V. 1982. On the 'empty' prefixes in Russian. *Russian Language Journal* 36. 14-30.
- Danaher, David. 2003. *The Semantics and Discourse Function of Habitual-Iterative Verbs in Contemporary Czech*. Munich: Lincom Europa.
- Dickey, Stephen. 2000. *The Parameters of Slavic Aspect*. Stanford: CSLI Publications.
- Dickey, Stephen M. and Laura A. Janda. 2009. *Xoxotnul, sxitiril*: The relationship between semelfactives formed with -nu- and s- in Russian. *Russian Linguistics* 33. 229-248.
- Divjak, Dagmar. 2004. *Degrees of Verb Integration: Conceptualizing and Categorizing Events in Russian*. PhD Dissertation, KU Leuven.
- Divjak, Dagmar. 2009. Mapping between domains. The aspect-modality interaction in Russian. *Russian Linguistics* 33. 249-269.
- Divjak, Dagmar and Stefan Th. Gries. 2006. Ways of trying in Russian: Clustering behavioral profiles. *Corpus Linguistics and Linguistic Theory* 2. 23-60.
- Evgen'eva, A. P., ed. 1999. *Malyj Akademičeskij Slovar'*. Moscow: Russkij jazyk.
- Gries, Stefan Th. Forthcoming. Corpus data in usage-based linguistics: What's the right degree of granularity for the analysis of argument structure constructions? In Brdar, Mario, Milena Žic Fuchs, and Stefan Th. Gries (eds.), *Expanding cognitive linguistic horizons*. Amsterdam, Philadelphia: John Benjamins.
- Gries, Stefan Th. and Dagmar S. Divjak. 2009. Behavioral profiles: a corpus-based approach towards cognitive semantic analysis. In Vyvyan Evans & Stephanie S. Pourcel (eds.), *New directions in cognitive linguistics*, 57-75. Amsterdam: John Benjamins.
- Išačenko, A. V. 1960. *Grammatičeskij stroj russkogo jazyka v sopostavlenii s slovackim – Čast' vtoraja: morfologija*. Bratislava: Izdatel'stvo akademii nauk.
- Janda, Laura A. 2004. A metaphor in search of a source domain: the categories of Slavic aspect. *Cognitive Linguistics* 15. 471-527.
- Janda, Laura A. 2007. Aspectual clusters of Russian verbs. *Studies in Language* 31. 607-648.
- Janda, Laura A. 2010. Prefixed Perfectives from Non-Determined Motion Verbs in Russian. In Viktoria Driagina-Hasko and Renee Perelmutter (eds.), *New Approaches to Slavic verbs of motion* (= Studies in Language Companion Series 115), 125-140. Amsterdam/Philadelphia: John Benjamins.
- Janda, Laura A. and Tore Nessel. 2010. Taking Apart Russian RAZ-. *Slavic and East European Journal* 54(3). 476-501.
- King, Bruce M and Edward Minium. 2008. *Statistical Reasoning in the Behavioral Sciences*. Hoboken, NJ: John Wiley & Sons.
- Krongauz, Maksim A. 1998. *Pristavki i glagoly v russkom jazyke: semantičeskaja grammatika*. Moscow: Jazyki russkoj kul'tury.
- Lyashevskaya, O. N. and S. A. Sharoff. 2010. *Častotnyj slovar' sovremennogo russkogo jazyka (na materiale Nacional'nogo korpusa russkogo jazyka)*. Moscow: Azbukovnik.

- Makarova, Anastasia and Laura A. Janda. 2009. Do It Once: A Case Study of the Russian -*ny*- Semelfactives. *Scando-Slavica* 55. 78-99.
- Newman, John. 2008. Aiming low in linguistics: Low-level generalizations in corpus-based research. *Proceedings of the 11th International Symposium on Chinese Languages and Linguistics, National Chiao Tung University, Hsinchu, Taiwan*. May 24 2008. <http://www.ualberta.ca/~johnnewm/Aiming%20Low.pdf>.
- Newman, John and Sally Rice. 2006. Transitivity schemas of English EAT and DRINK in the BNC. In Stefan Th. Gries and Anatol Stefanowitsch (eds.), *Corpora in Cognitive Linguistics: Corpus-Based Approaches to Syntax and Lexis*, 225-260. Berlin: Mouton de Gruyter.
- Nuyts, Jan. 2001. *Epistemic modality, language, and conceptualization: A cognitive-pragmatic perspective*. Amsterdam: John Benjamins.
- Nuyts, Jan. 2007. Cognitive linguistics and functional linguistics. In D. Geeraerts, H. Cuyckens (eds.), *Handbook of cognitive linguistics*, 543-565. Oxford: Oxford University Press.
- Ožegov, S. I. and N. Ju. Švedova. 2001. *Slovar' russkogo jazyka*. Moscow: Russkij jazyk.
- Padučeva, Elena V. 1996. *Sematičeskie issledovanija. Semantika vremeni i vida v russkom jazyke. Semantika narrativa*. Moscow: Jazyki russkoj kul'tury.
- Pul'kina, Il'za M. and Ekaterina B. Zaxava-Nekrasova. 1977. *Učebnik russkogo jazyka*. Moscow: Russkij jazyk.
- Rice, Sally and John Newman. 2005. Inflectional islands. Presentation at the 9<sup>th</sup> International Cognitive Linguistics Conference, Yonsei University, Seoul, Korea. Available at <http://www.ualberta.ca/~johnnewm>.
- Šatunovskij, Il'ja B. 2002. Nesoveršennyj vs. soveršennyj vid v imperative. In: Nina Arutjunova, V. Apresjan and Anatolij Baranov (eds.), *Logičeskij analiz jazyka: Semantika načala i konca*, 267-309. Moscow: Indrik.
- Šatunovskij, Il'ja B. 2009. *Problemy russkogo vida*. Moscow: Jazyki slavjanskix kul'tur.
- Šaxmatov, A. A. 1941. *Sintaksis russkogo jazyka* (Russian syntax). Leningrad. Učpedgiz.
- Schooneveld, Cornelius H. van. The so-called 'préverbe vides' and neutralization. In *Dutch contributions to the Fourth International Congress of Slavistics*, 159-161. The Hague: Mouton, 1958.
- Šmelev, Alexej and Anna Zaliznjak. 2006. Aspect, modality, and closely-related categories in Russian. Paper presented at the Slavic Linguistics Society Conference in at Indiana University.
- Stefanowitsch, Anatol and Stefan Th. Gries. 2003. Collostructions: Investigating the interaction of words and constructions. *International Journal of Corpus Linguistics* 8, 209-243.
- Steinfeldt, E. 1970. *Russian Word Count*. Moscow: Progress.
- Stubbs, Michael. 2001. *Words and Phrases: Corpus Studies of Lexical Semantics*. Oxford: Blackwell.
- Švedova, N. Ju. et al. 1980. *Russkaja grammatika, tom I*. Moscow: Nauka.
- Tabachnik, Barbara G. and Linda S. Fidell. 2007. *Using Multivariate Statistics*. Boston: Pearson.
- Timberlake, Alan. 2004. *A Reference Grammar of Russian*. Cambridge: Cambridge University Press.
- Vey, M. "Les préverbes 'vides' en tchéque moderne." *Revue des études slaves* 29 (1952): 82-107.
- Vinogradov, V. V. 1938. *Sovremennyj russkij jazyk. Grammatičeskoe učenie o slove*. Moscow: Učpedgiz.
- Wade, Terence. 1992. *A Comprehensive Russian Grammar*. Oxford: Blackwell.
- Zaliznjak, Andrej. 1980. *Grammatičeskij slovar' russkogo jazyka*. Moscow: Russkij jazyk.
- Zaliznjak, A. A. and A. D. Šmelev. 2000. *Vvedenie v russkuju aspektologiju*. Moscow: Jazyki russkoj kul'tury.
