# Supplementary material
Source: publisher figshare collection journal article supplement (https://brill.figshare.com/articles/dataset/_/7092860)
Supplement: Supplementary file 1 [file 1 › Janda 7. semantic maps handout.pdf]

**“Semantic maps: Do they reveal a universal underlying conceptual space?”**

**Laura A. Janda, University of Tromsø**

**Polyfunctional grams**

1. Polish: ‘to a place’

- a. *do szkoły* ‘to school’ [*do* + genitive]  
b. *na plażę* ‘to the beach’ [*na* + accusative]

2. Polish: ‘through a place’

- a. *lasem* ‘through the forest’ [bare instrumental]  
b. *przez las* ‘through the forest’ [*przez* + accusative]

3. ‘The children are walking to school.’

Polish: *Dzieci idą do szkoły.* [*do* + genitive]  
Czech: *Děti jdou do školy.* [*do* + genitive]  
Russian: *Deti idut v školu.* [*v* + accusative]

4. ‘I am going to my mother.’

Polish: *Idę do mamy.* [*do* + genitive]  
Czech: *Jdu k mámě.* [*k* + dative]  
Russian: *Ja idu k маме.* [*k* + dative]

**Table 1: English, Norwegian and Polish expressions of temporal location**

| Function | English                                     | Norwegian                     | Polish                                |                                              |
|----------|---------------------------------------------|-------------------------------|---------------------------------------|----------------------------------------------|
| hour     | <i>at six o'clock</i>                       | <i>klokka fire</i>            | <i>o szóstej</i>                      | <i>o</i> + locative                          |
| day part | <i>in the night</i>                         | <i>om natten / i natt</i>     | <i>w nocy / nocą</i>                  | <i>w</i> + locative /<br><i>instrumental</i> |
| day      | <i>on Saturday / on the first of August</i> | <i>på lørdag</i>              | <i>w sobotę / pierwszego sierpnia</i> | <i>w</i> + accusative /<br><i>genitive</i>   |
| month    | <i>in November</i>                          | <i>i november</i>             | <i>w listopadzie</i>                  | <i>w</i> + locative                          |
| season   | <i>in the summer</i>                        | <i>om sommeren / i sommer</i> | <i>w lecie / latem</i>                | <i>w</i> + locative /<br><i>instrumental</i> |
| year     | <i>in the year 2006</i>                     | <i>i 2006</i>                 | <i>w roku 2006</i>                    | <i>w</i> + locative                          |

**Bibliography**

- Aikhenvald, Alexandra -- Robert Dixon (eds.) 2003 *Studies in evidentiality*. Amsterdam: Benjamins.
- Anderson, Lloyd 1982 “The ‘Perfect’ as a universal and as a language particular category”, in: Paul Hopper (ed.), 227-264.
- Bowerman, Melissa -- Soonja Choi 2003 “Space under construction: language-specific spatial categorization in first language Acquisition”, in: Dedre Gentner -- Susan Goldin-Meadow (eds.), 387-427.
- Brugman, Claudia 1983 “The use of body-part terms as locatives in Chalcatongo Mixtec”, in: Alice Schlichter -- Wallace Chafe -- Leanne Hinton (eds.), 235-290.
- Casad, Eugene H. 1988 “Conventionalization of Cora locationals”, in: Brygida Rudzka-Ostyn (ed.), 345-78.
- Clancy, Steven J. 2006 “The topology of Slavic case: semantic maps and multidimensional scaling”, *Glossos* 7: <http://www.seelrc.org/glossos/>.
- Croft, William 2001 *Radical construction grammar*. Oxford: Oxford University Press.
- Croft, William 2003 *Typology and universals*. (2<sup>nd</sup> edition.) Cambridge: Cambridge University Press.
- Croft, William -- Keith T. Poole 2008 “Inferring universals from grammatical variation: multidimensional scaling for typological analysis”. *Theoretical Linguistics* 34:1, 1-38.
- Dahl, Östen 1985 *Tense and aspect systems*. Oxford: Basil Blackwell.
- Flier, Michael (ed.) in progress *American contributions to the XIV international congress of Slavists*. Bloomington, Indiana: Slavica.
- Friedman, Victor 2003 “Evidentiality in the Balkans with special attention to Macedonian and Albanian”, in: Alexandra Aikhenvald -- Robert Dixon (eds.), 189-218.
- Gentner, Dedre -- Susan Goldin-Meadow (eds.) 2003 *Language in mind*. Cambridge-London: MIT Press.
- Haspelmath, Martin 1997a *Indefinite pronouns*. Oxford: Oxford University Press.
- Haspelmath, Martin 1997b *From space to time: Temporal adverbials in the world's languages*. Munich: LINCOM EUROPA.
- Haspelmath, Martin 2003 “The geometry of grammatical meaning: semantic maps and cross-linguistic comparison”. *The new psychology of language* 2: 211-42.
- Hopper, Paul (ed.) 1982 *Tense and aspect: Between semantics and pragmatics*. (Typological studies in language 1.) Amsterdam: John Benjamins.
- Janda, Laura A. 1996 “Figure, ground, and animacy in Slavic declension,” *Slavic and East European Journal* 40: 325-355.
- Janda, Laura A. 1999 “Whence virility? The rise of a new gender distinction in the history of Slavic”, in: Margaret H. Mills (ed.), 201-228.
- Janda, Laura A. 2002 “The Case for Competing Conceptual Systems”, in: Barbara Lewandowska-Tomaszczyk -- Kamila Turewicz (eds.), 355-374.

- Janda, Laura A. 2004 "A metaphor in search of a source domain: the categories of Slavic aspect", *Cognitive Linguistics* 15, 471-527.
- Janda, Laura A. forthcoming "Aspectual clusters of Russian verbs", *Studies in language*.
- Janda, Laura A. in progress "Semantic motivations for aspectual clusters of Russian verbs", in: Michael Flier (ed.)
- Janda, Laura A. -- Steven J. Clancy 2002 *The case book for Russian*. Bloomington, Indiana: Slavica.
- Janda, Laura A. -- Steven J. Clancy 2006 *The case book for Czech*. Bloomington, Indiana: Slavica.
- Kemmer, Suzanne 1993 *The middle voice*. (Typological studies in language 23.) Amsterdam: John Benjamins
- Lakoff, George -- Mark Johnson 1999 *Philosophy in the flesh: The embodied mind and its challenge to western thought*. New York: Basic Books.
- Langacker, Ronald 1987a "Nouns and verbs", *Language* 63: 53-94.
- Langacker, Ronald 1987b *Foundations of cognitive grammar*. (I.) Stanford: Stanford U Press.
- Langacker, Ronald 1991a *Foundations of cognitive grammar*. (II.) Stanford: Stanford U Press.
- Langacker, Ronald 1991b *Concept, Image, and Symbol: The Cognitive Basis of Grammar*. Berlin-New York: Mouton de Gruyter.
- Langacker, Ronald W 2006 "On the continuous debate about discreteness", *Cognitive Linguistics* 17: 107-151.
- Lehečková, Helena 2003 "Slavonic versus Finno-Ugric languages: On missing categories in grammar and cognition", *Glossos* 4: <http://www.seelrc.org/glossos/issues/4/leheckova.pdf>.
- Levinson, Stephen -- Sergio Meira -- Language and cognition Group 2003 "'Natural concepts' in the spatial topological domain – adpositional meanings in crosslinguistic perspective: an exercise in semantic typology", *Language* 79: 485-516.
- Lewandowska-Tomaszczyk, Barbara -- Kamila Turewicz (eds.) 2002 *Cognitive Linguistics today*. (Łódź studies in Language 6.) Frankfurt: Peter Lang.
- Majid, Asifa -- Melissa Bowerman -- Sotaro Kita -- Daniel B. M. Haun -- Stephen C. Levinson 2004 "Can language restructure cognition? The case for space", *Trends in cognitive sciences* 8: 108-114.
- Malt, Barbara C. -- Steven A. Sloman -- Silvia P. Gennari 2003 "Speaking versus thinking about objects and actions", in: Dedre Gentner -- Susan Goldin-Meadow (eds.), 81-111.
- Mills, Margaret H. (ed.) 1999 *Slavic gender linguistics*. Amsterdam-Philadelphia: John Benjamins.
- Rudzka-Ostyn, Brygida (ed.) 1988 *Topics in cognitive Linguistics*. (Current issues in linguistic theory, 50.) Amsterdam: Benjamins.
- Schlichter, Alice -- Wallace Chafe -- Leanne Hinton (eds.) 1983 *Studies in Mesoamerican Linguistics* (Report 4) Berkeley: Survey of California and other Indian Languages.
- Schulze-Bernd, E. -- N. P. Himmelmann (eds.) in press *Depictive Predications*. Oxford: Oxford University Press.
- Shopen, T. (ed.) 1985 *Language typology and syntactic description: Vol 3. Grammatical categories and the lexicon*. Cambridge: Cambridge University Press.
- Talmy, Len 1985 "Lexicalization patterns: Semantic structure in lexical forms", in: T. Shopen (ed.), 55-149.
- Van der Auwera, Johan -- Vladimir A. Plungian 1998 "Modality's semantic map", *Linguistic Typology* 2: 79-124.
- Van der Auwera, Johan -- Nina Dobrushina -- Valentin Goussev 2004 "A semantic map for imperative-hortatives", in Willems et al (eds.), 44-66.
- Van der Auwera, Johan -- Andrej Malchukov in press "A semantic map for depictive adjectivals", in: E. Schulze-Bernd -- N. P. Himmelmann (eds.).
- Van der Auwera, Johan -- Ceyhan Temurcu in press "Semantic maps", *Encyclopedia of language and Linguistics*. Oxford: Elsevier.
- Willems, Dominique -- Bart Defrancq -- Timothy Coleman -- Dirk Noel (eds.) 2004 *Contrastive analysis in language. Identifying linguistic units of comparison*. Basingstoke: Palgrave Macmillan.
