# Supplementary material
Source: publisher figshare collection journal article supplement (https://brill.figshare.com/articles/dataset/_/7092860)
Supplement: Supplementary file 1 [file 1 › Janda 7. Semantic maps.ppt.pdf]

# Semantic maps: Do they reveal a universal underlying conceptual space?

Laura A. Janda  
University of Tromsø

# Main idea

- We don't know whether all languages are based on the “same” parameters
  - We can't build up a theory based on such an assumption
- Semantic maps are an example of a discrete type of model, and it is possible that they conflate data that is not compatible

# Overview

1. Polyfunctional grams. How can they be compared across various languages?
2. What is a semantic map? – Examples
3. DISCRETE vs. CONTINUOUS (Langacker 2006) and what this distinction means for semantic maps
4. Linguistic differences that cannot be accommodated in semantic maps
5. Conclusions: What does it mean to make linguistic comparisons?

# Polyfunctional grams

- All languages have such units
  - Adpositions, inflectional and derivational morphemes, etc.
- These units represent linguistic categories
  - Tense, aspect, case
- The categories reflect the way that people understand experiences such as physical location, time, and relationships between things

# Polyfunctional grams

- How can such units be described?
  - Cognitive linguists use
    - Schemas
    - Prototypes
    - Radial categories

# Polyfunctional grams

- An example:
  - The genitive case in Slavic
    - Schema: Something (trajectory) that moves or is located near something else (landmark)
    - Prototypes: ‘source’, ‘goal’, ‘reference’, ‘whole’
    - Radial category (with metaphorical extensions)

# Genitive

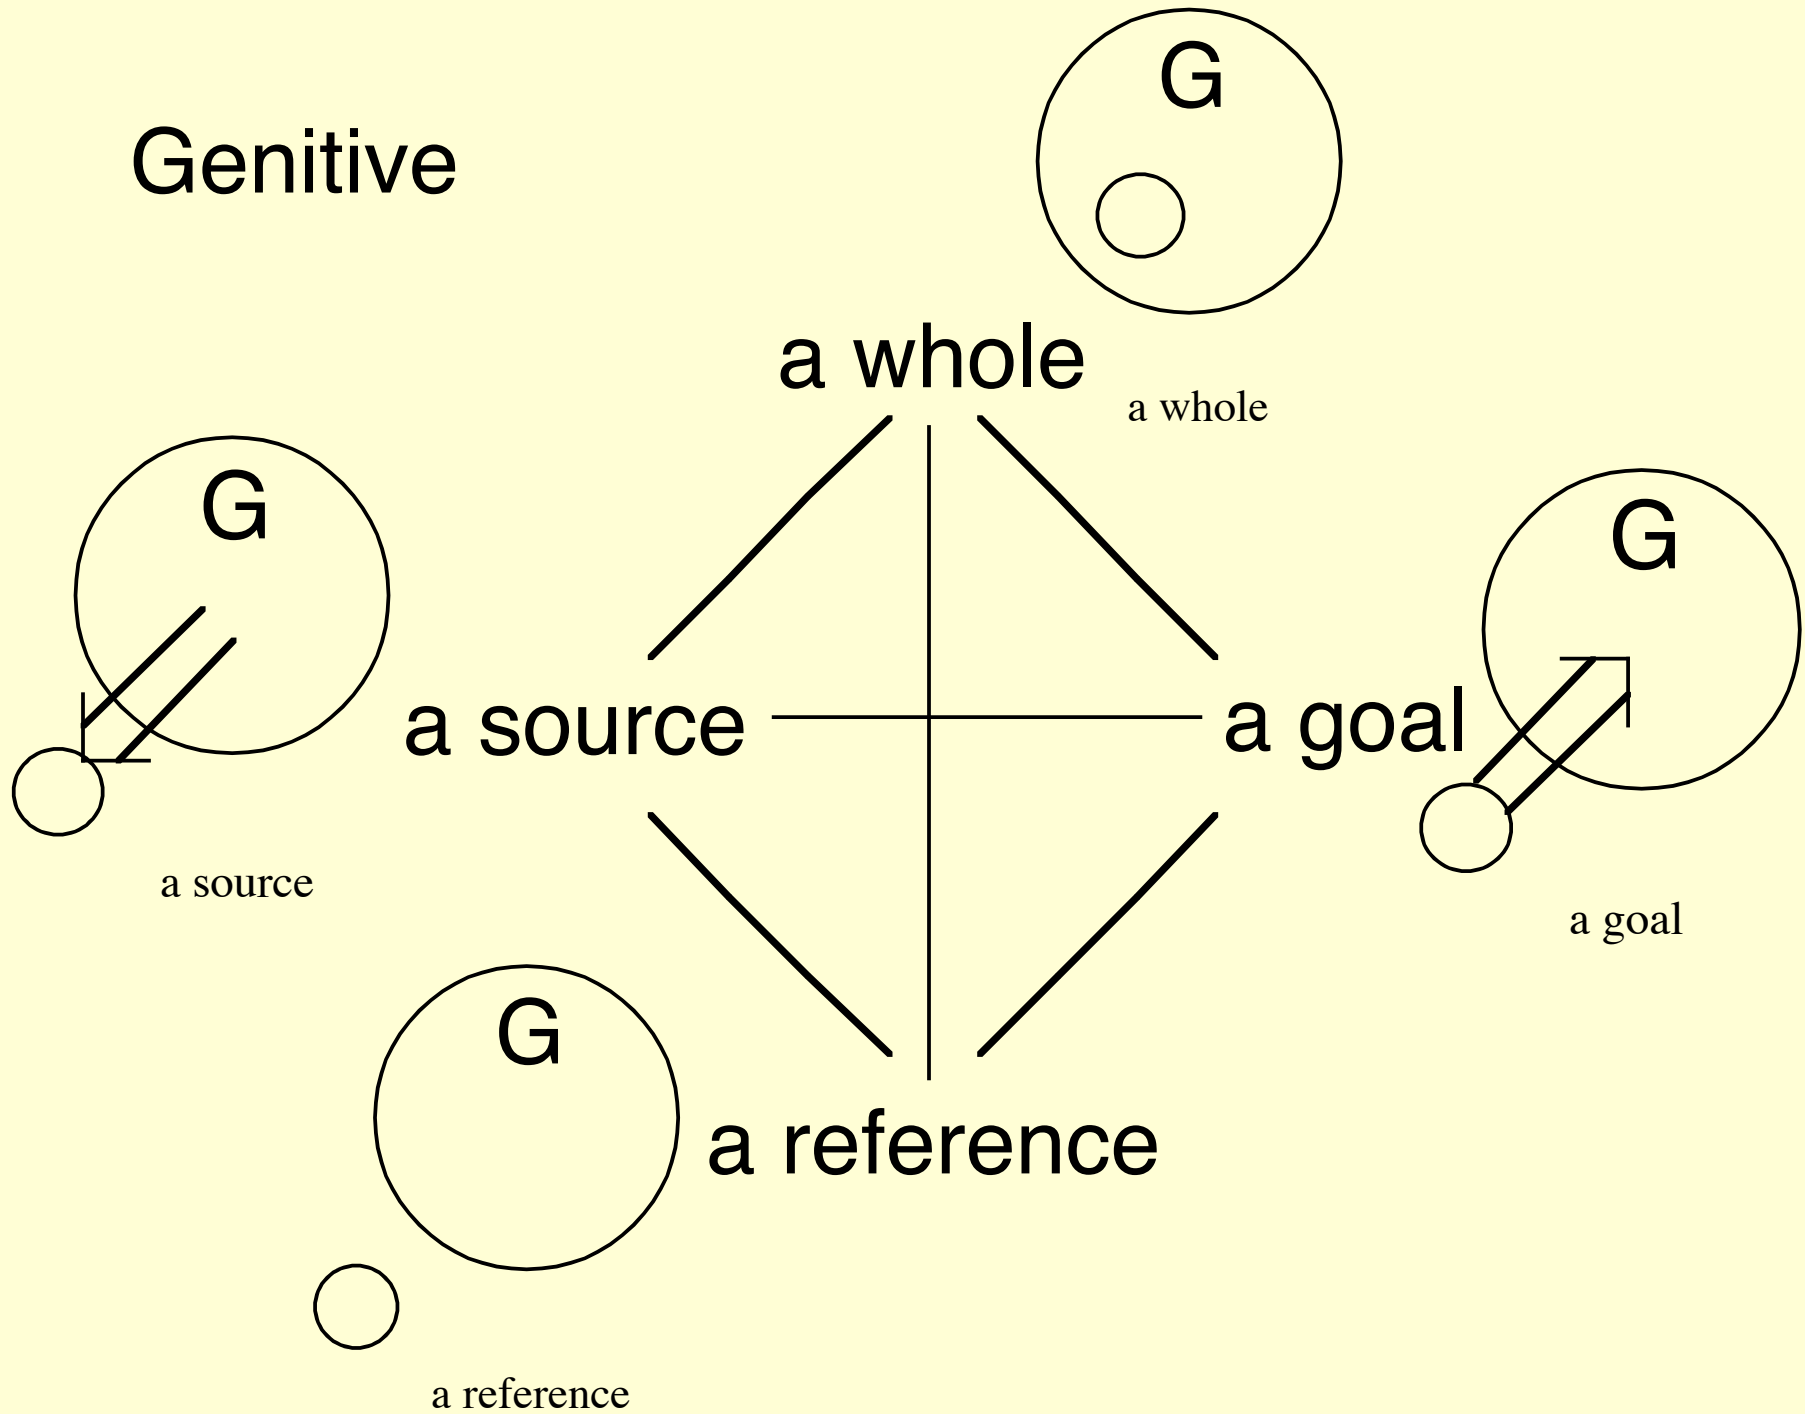

# Polyfunctional grams

- They are more complicated than one might think
  - There is no one-to-one correspondence between such units and the concepts that they represent
  - These units often overlap with each other
  - These units can be used in various combinations
- See Polish examples 1 and 2

# Polyfunctional grams

- It just gets worse when one tries to compare such units across several languages
  - See examples 3 and 4
    - Polish, Czech, and Russian inherited the “same” preposition and case systems
- What happens when we have dissimilar, unrelated languages?  
Semantic maps are designed to compare large numbers of languages

# What is a semantic map?

- The most prominent theorists are
  - Croft
    - (2001, 2003, Croft and Poole 2008)
  - Haspelmath
    - (1997a, 1997b, 2003)
- Others who have made significant contributions
  - Anderson (1982), Clancy (2006), Kemmer (1993), van der Auwera & Plungjan (1998), van der Auwera, Dobrushina & Goussev (2004), van der Auwera & Malchukov (in press), van der Auwera & Temurcu (in press)

# What is a semantic map?

- Terminology
  - Conceptual space
    - All possible distinctions that a human being can perceive
    - The backdrop (grid) for a semantic map
  - Semantic map
    - The distribution of actual distinctions made by one or a number of languages across the parameters of conceptual space

# What is a semantic map?

- Research proceeds from individual languages to semantic maps to conceptual space
- Semantic maps claim that it is possible to find
  - Parameters of a universal conceptual space (what kinds of distinctions human beings can both perceive and code in language)
  - Implicational universals (which functions can co-occur in grams)
  - Grammaticalization paths (diachronic directions for grammaticalization)

# Are there limitations to semantic maps as a linguistic model?

- When semantic maps compare several languages, the model is making an important assumption:
  - All languages are based on same parameters, merely choosing various subsets of those parameters for grammaticalization
- Is it really possible to discover the parameters of human conceptualization by using semantic maps?
- First we need to work through an example...

# Temporal locations (Haspelmath 1997b)

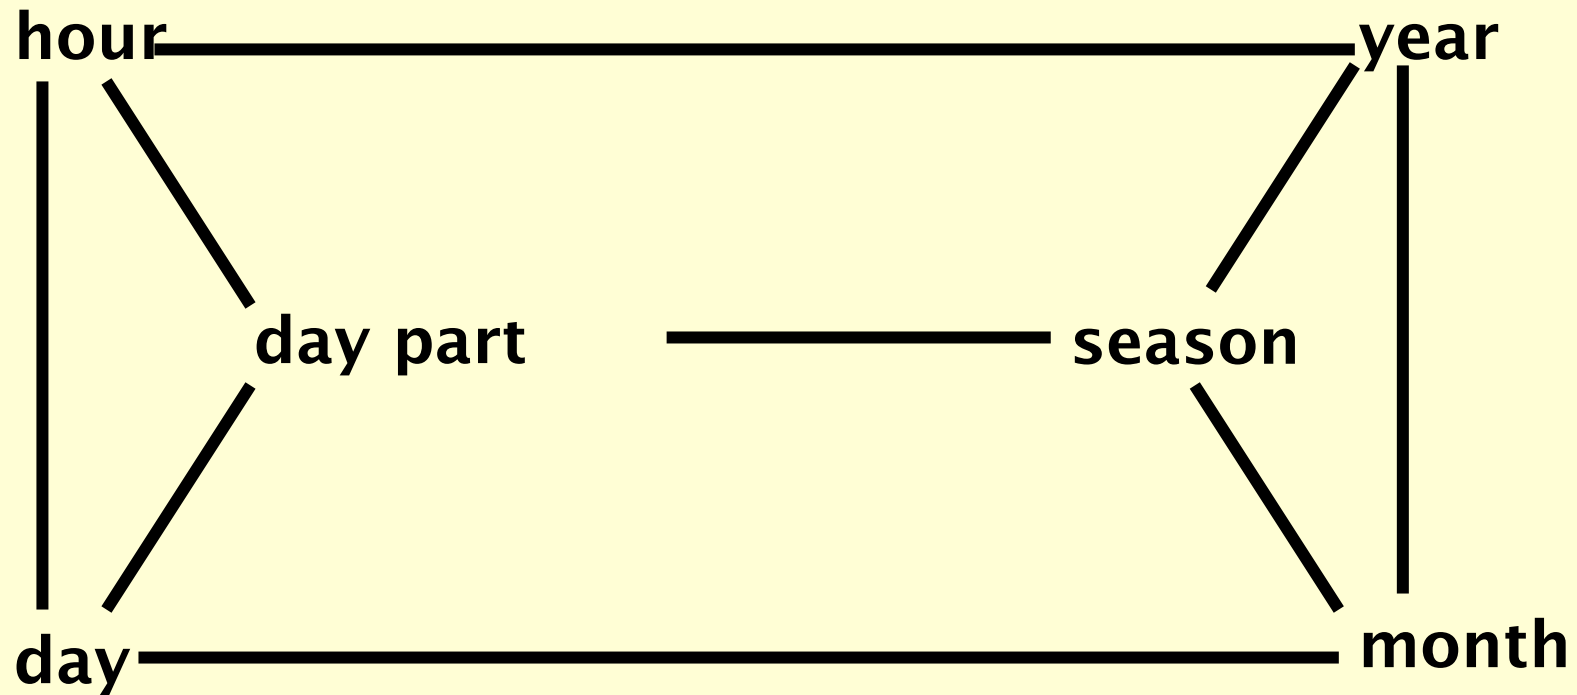

# English

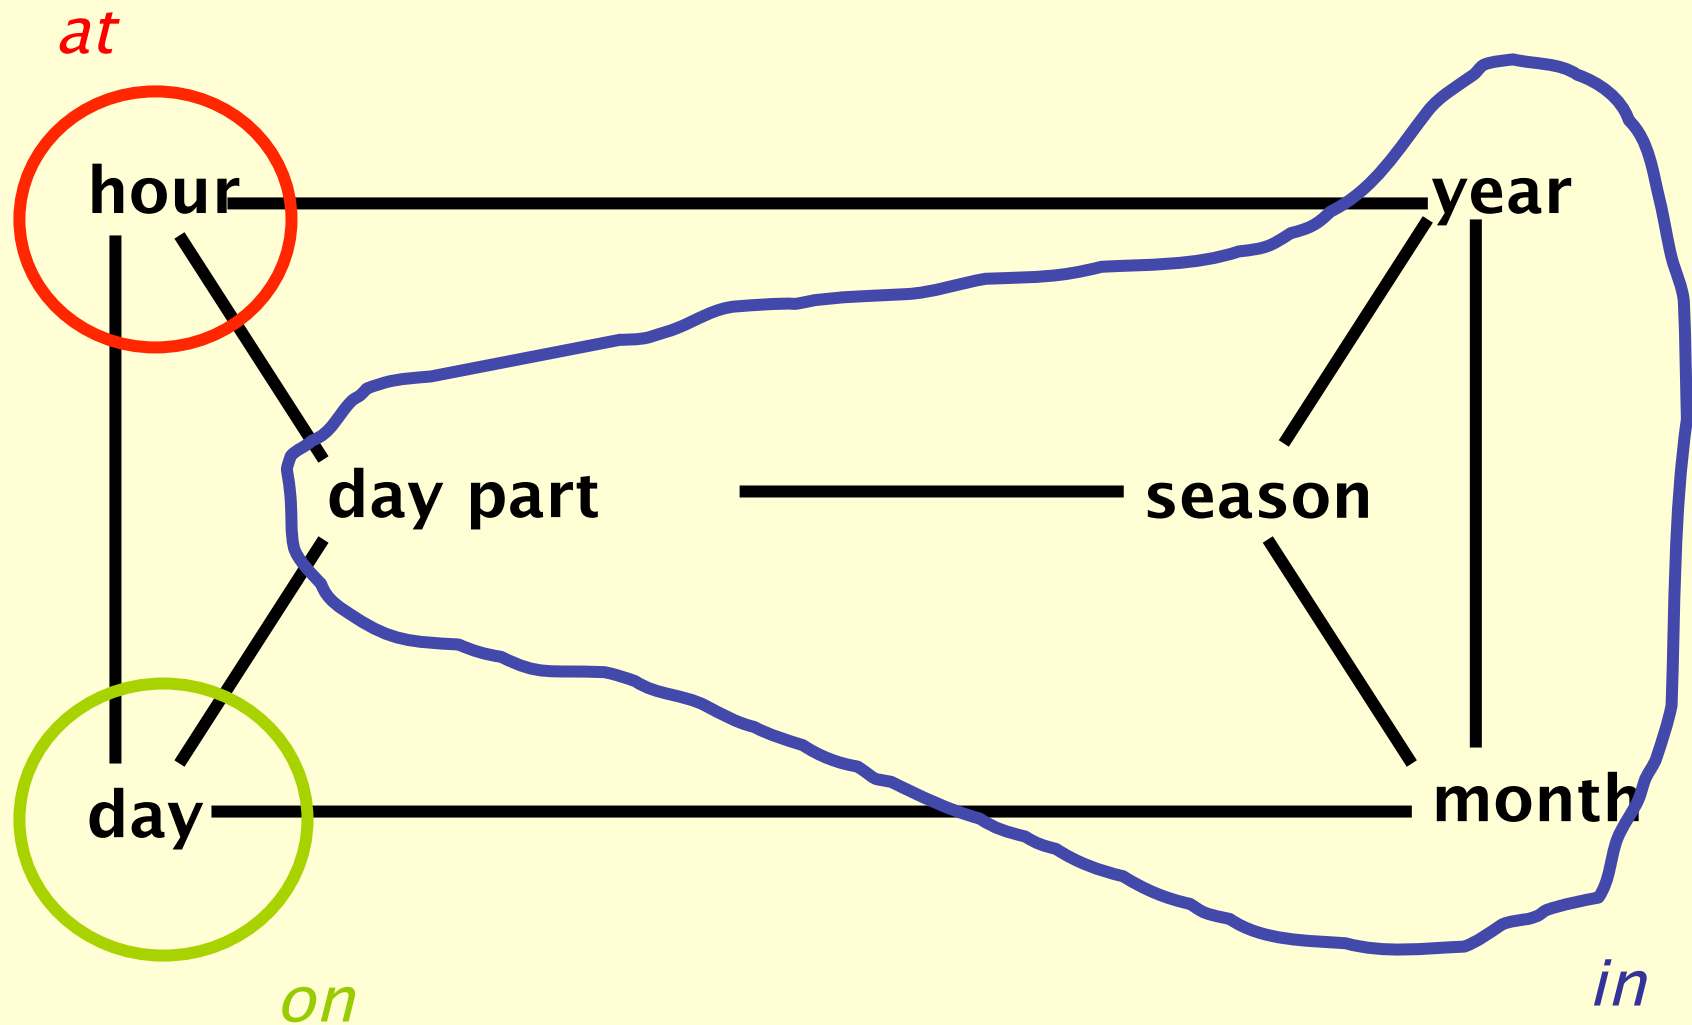

# Norwegian

*[no preposition]*

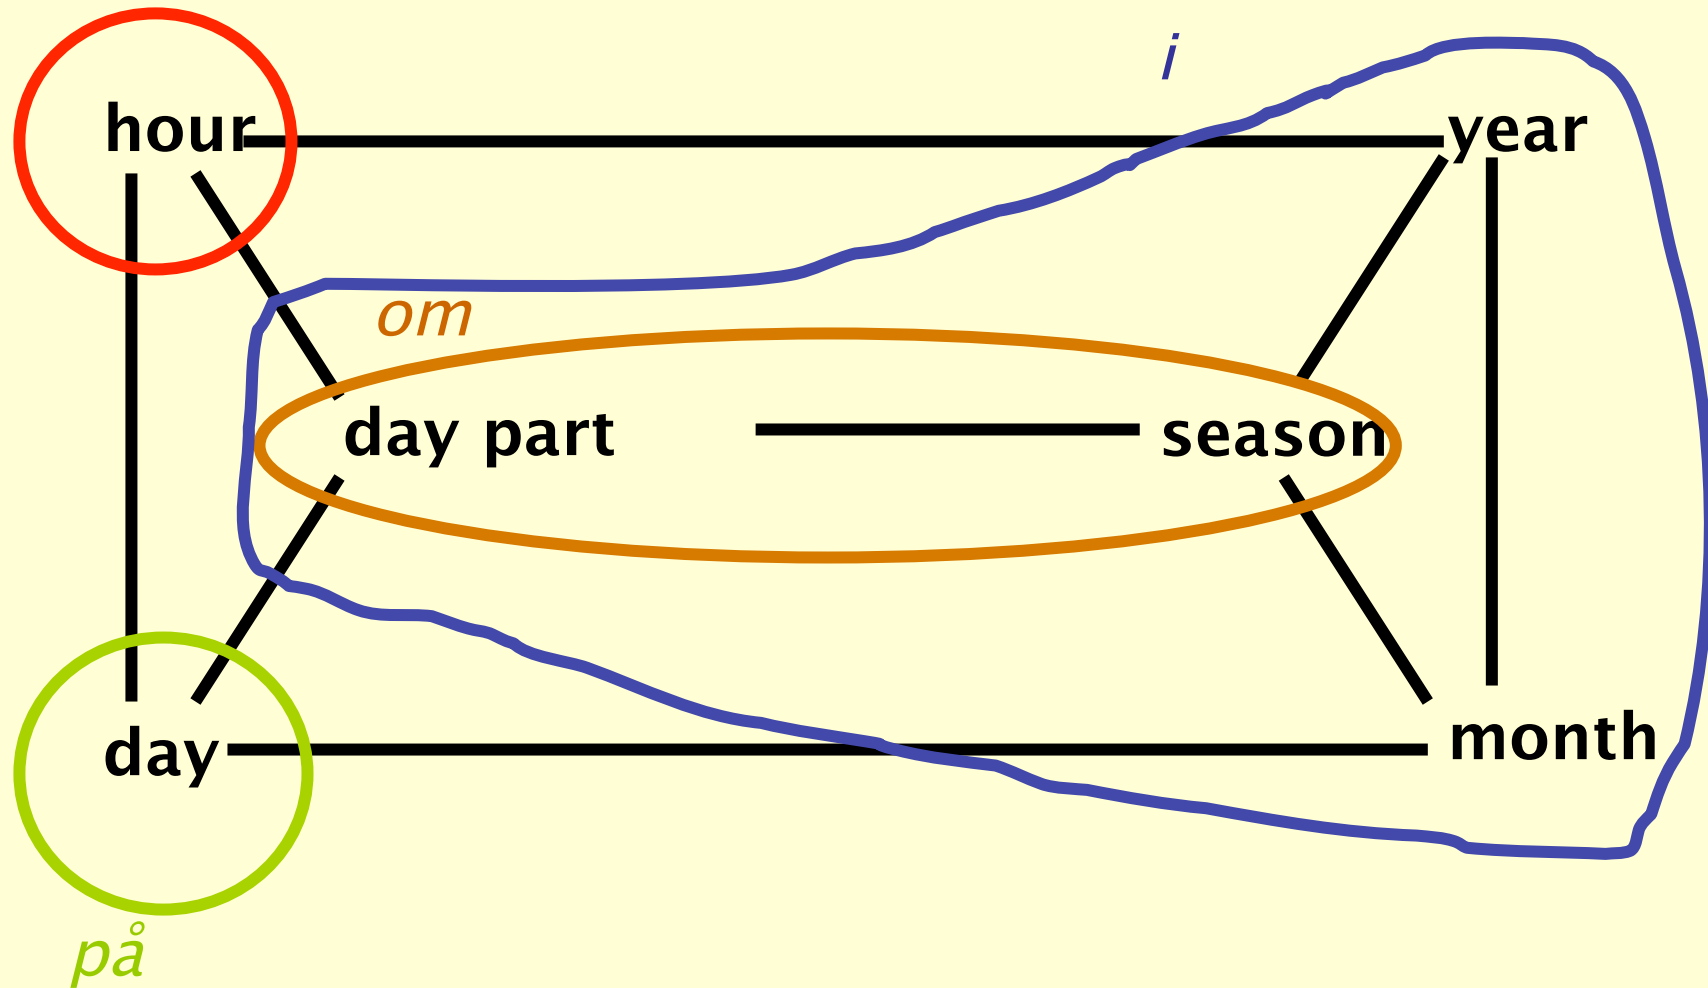

# Polish

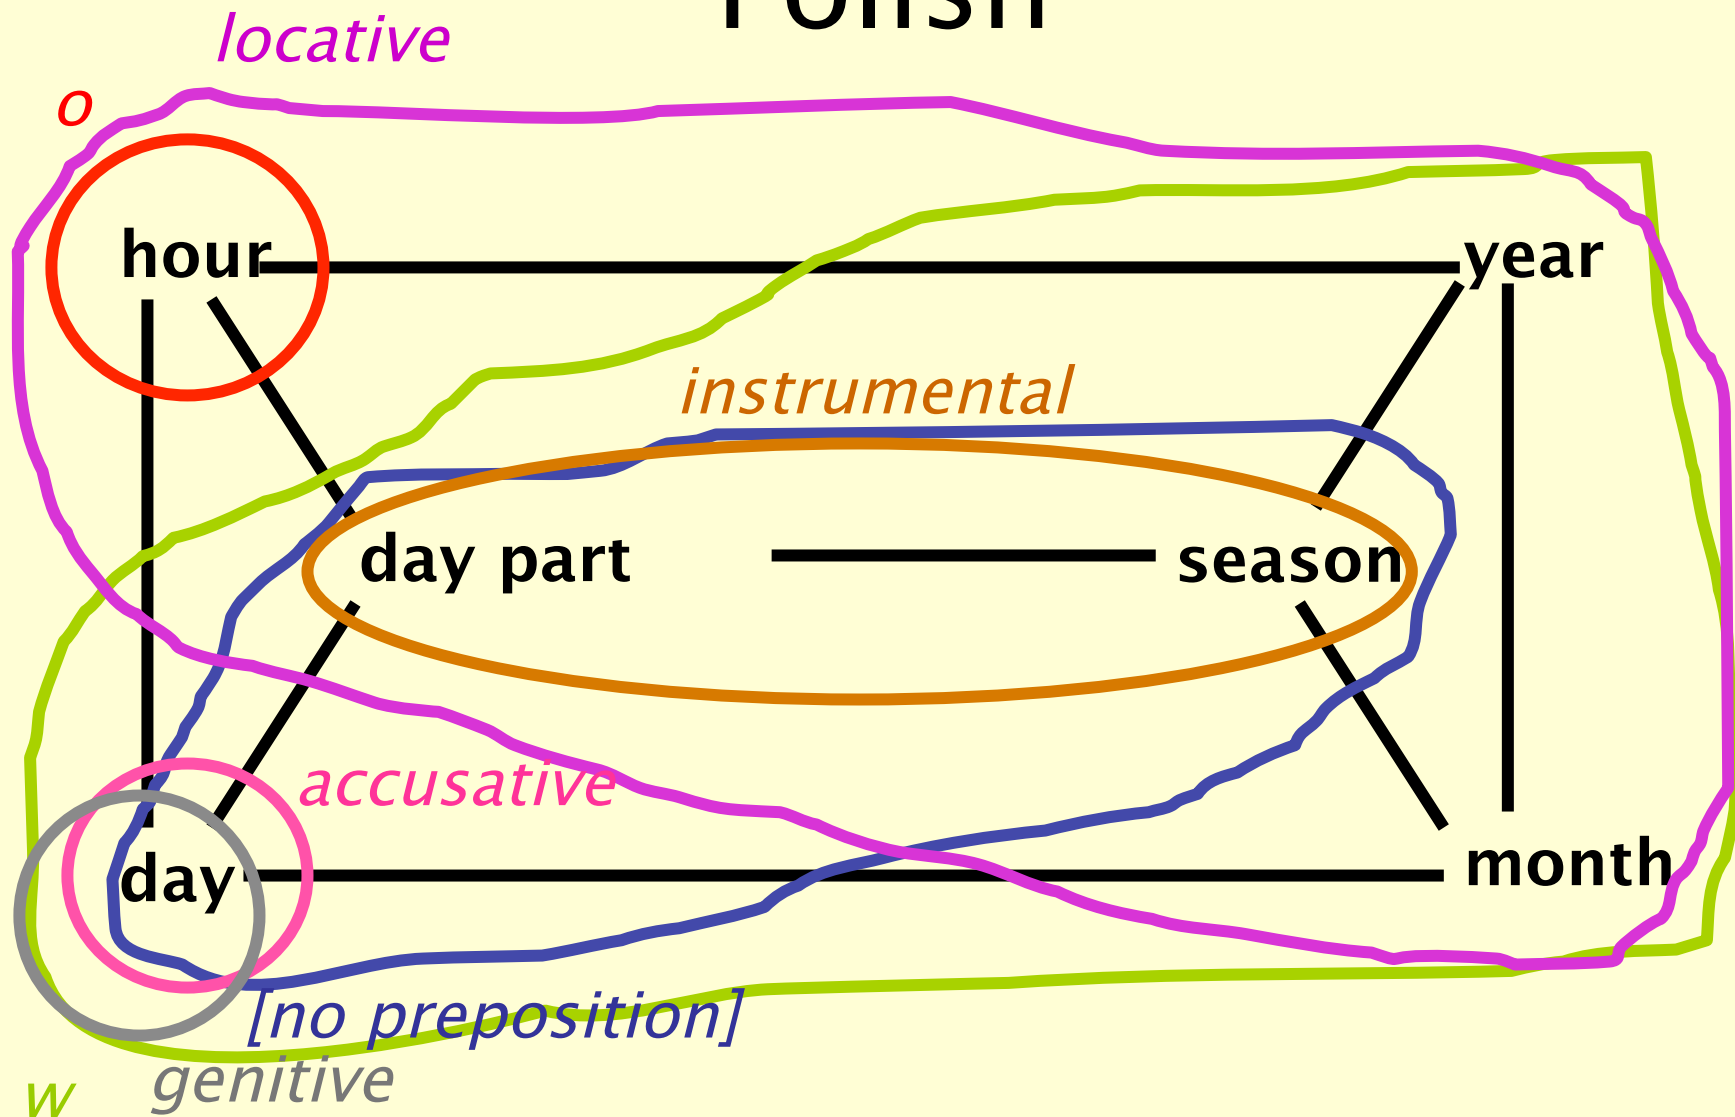

# The semantic map for temporal location

- It works – We do find a typological pattern here
  - All languages use only contiguous portions of the map
  - In contiguous portions of the map we find
    - longer time periods vs. shorter time periods
    - day part connected to day vs. season connected to year
- But these are not “deep” conclusions

# DISCRETE vs. CONTINUOUS

- Langacker (2006)
  - All models are metaphorical, and all metaphors are potentially misleading
  - All metaphors emphasize some factors and suppress others
  - When a model is too discrete or too continuous, it suppresses information
  - Linguistic models tend to be too discrete
  - Even a misleading model can lead to good results if the person using it takes into consideration its limitations

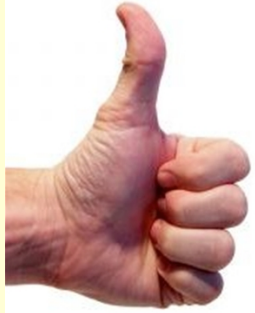

# Advantages of discrete models

- One can find “things” and “groups” in a continuous reality (galaxies, archipelagoes, villages, cf. Langacker 2006)
- One can see how individual grams overlap in their functions in a given domain
- One can find typological patterns across languages
- One can visualize messy empirical data as coherent wholes (more organization than a list and more details than an abstract general meaning, cf. Haspelmath 2003)

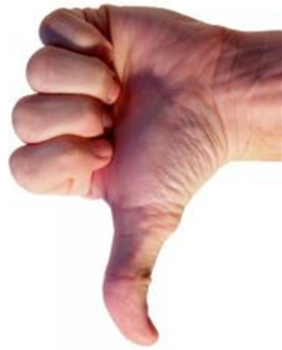

# Limitations of discrete models

- Semantic maps see only discrete points and ignore the continuous zones between them
- This effect is amplified when one makes comparisons across languages
- A cross-linguistic semantic map is two orders of magnitude more discrete than a radial category, for it ignores the continuous zones both at the level of individual languages and across languages



## Other limitations of discrete models

- When we say *in November* (Eng), *i november* (Norw) and *w listopadzie* (Pol), do *in*, *i* and *w* have “the same meaning”?
- Even when *in*, *i* and *w* are used in “the same meaning”, they have different things in their semantic baggage (different prototypes and metaphorical extensions)
- A semantic map shows only the “distances” between units – it doesn’t tell us anything about their meanings (Langacker, pc 2006)

# Langacker's alternative: a mountain range

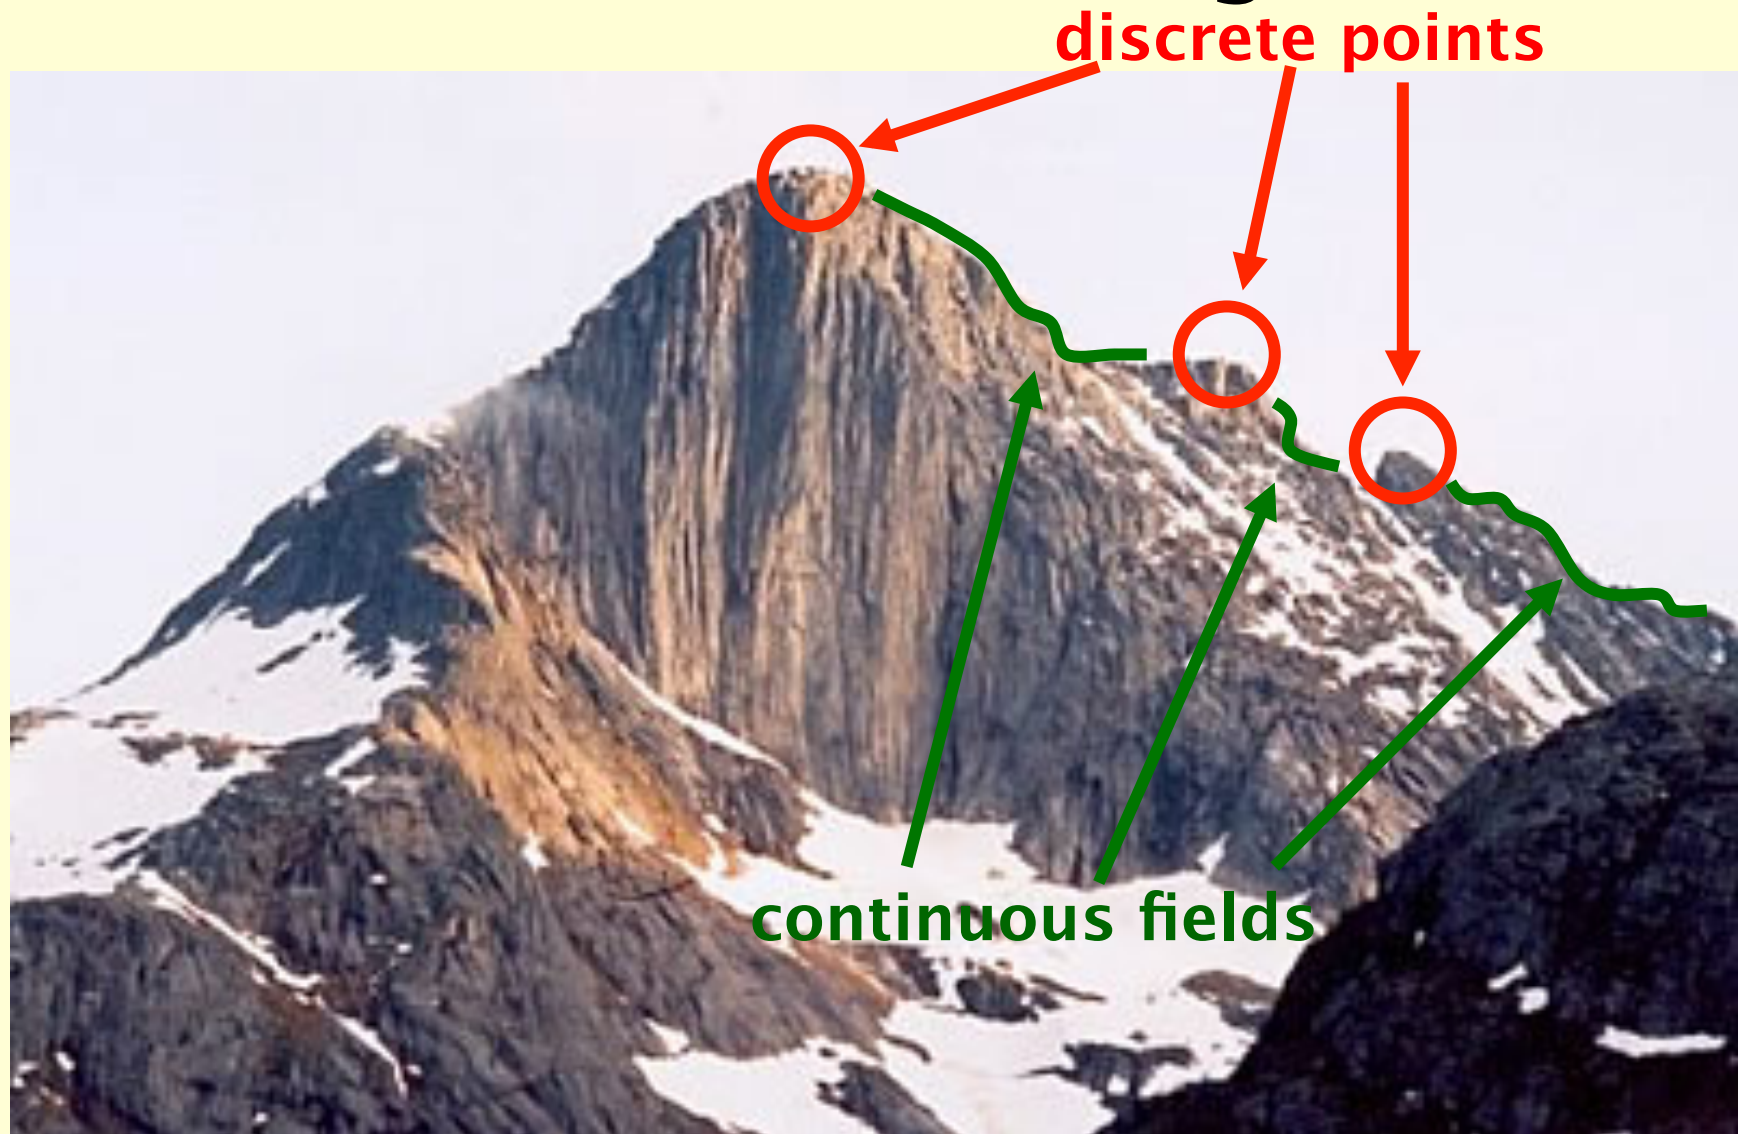

## Differences that cannot be accommodated in semantic maps

- Up until this point we have only talked about quantitative differences between models (discrete vs. continuous)
- We just *assumed* that the things that were being compared were indeed comparable...

# Qualitative differences

- Different parameters
  - one language uses one set of parameters and another language uses an entirely different set of parameters for the “same” domain
- Different means
  - one language has grammaticalized a distinction that another language represents only optionally in the lexicon
- Different metaphors
  - In different languages the “same” grammatical distinction is motivated by different metaphors

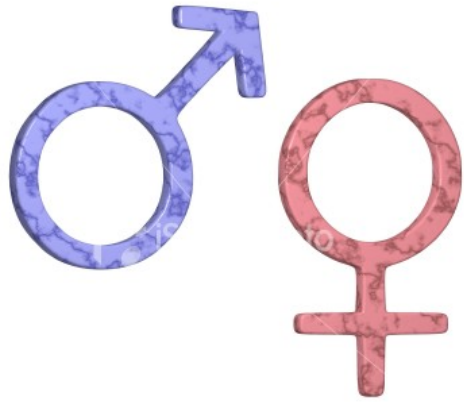

# Different parameters

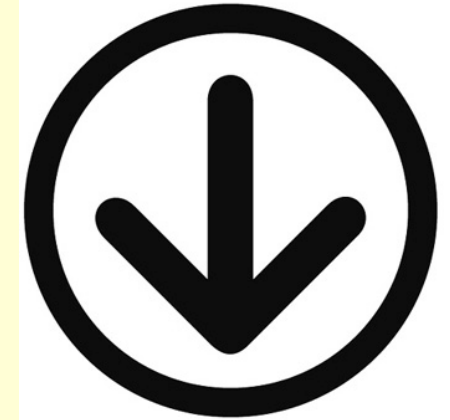

- Gender is very different in different languages
  - Finnish has no grammatical gender distinctions, but gender is obligatorily marked on nouns, adjectives, pronouns, and verbs in Slavic languages like Polish
- Location can be expressed in a variety of different ways
  - Tzeltal uses cardinal directions even for locating small items, whereas other languages use deictic terms such as *right* vs. *left*, *in front of* vs. *behind*

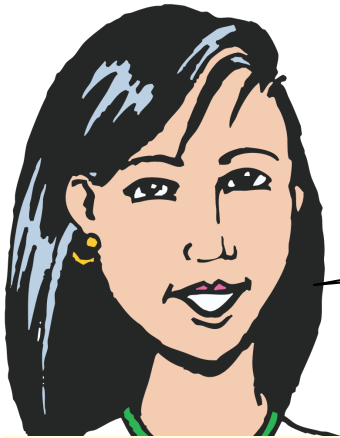

A: The apples are inside-bowl

B: The apples are loose fitting-bowl

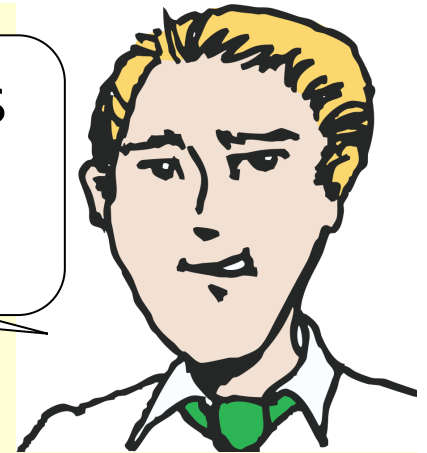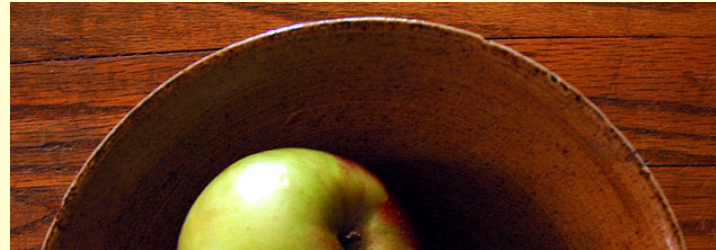

Do all of these distinctions come from only one conceptual space?

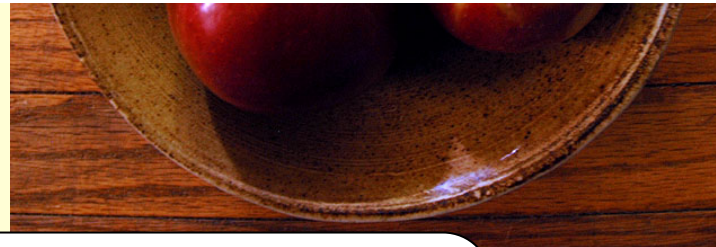

C: The apples are concave valley that faces me-bowl

D: The apples are stomach-bowl

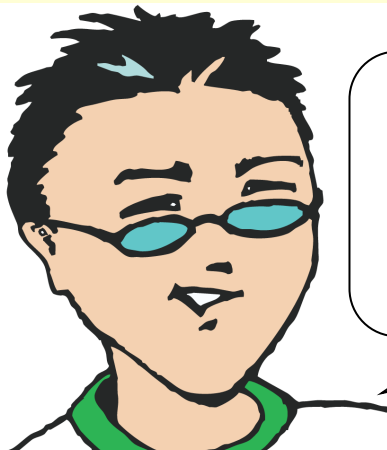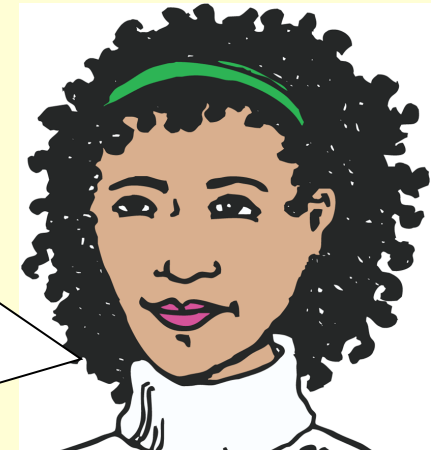

# Semantic maps of expressions for spatial location

- Levinson et al. (2003): 71 expressions for spatial location from 9 languages
  - Goal: to find out which expressions cluster together (rejecting the notion that these clusters represent innate universal categories)
- Croft & Poole (2008): used Levinson's data and applied more sophisticated mathematical analysis (Multi Dimensional Scaling)
  - Goal: to find universal categories

# Other questions

- Levinson et al. (2003) used data from 9 languages, but there are perhaps as many as 7000 languages in the world
  - Do we want to base a theory on only 0.13% of the relevant data?
- Levinson et al. (2003) researched 71 expressions for spatial location
  - Do we know that these 71 spatial locations are precisely the ones that represent all the differences that a human being can perceive and encode in language?

?

?

?

# Different means

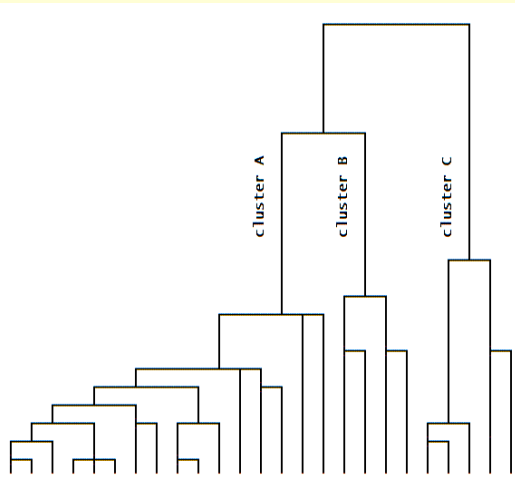

- A concept can be expressed by a grammatical category in one language, but be expressed only lexically in another language
  - Evidential verb paradigms in Macedonian and Albanian vs. *angivelig* (Norw), *allegedly* (Eng), *rzekomo* (Pol)
- Two (or more) concepts can have different status in different languages
  - verb-framed vs. satellite-framed

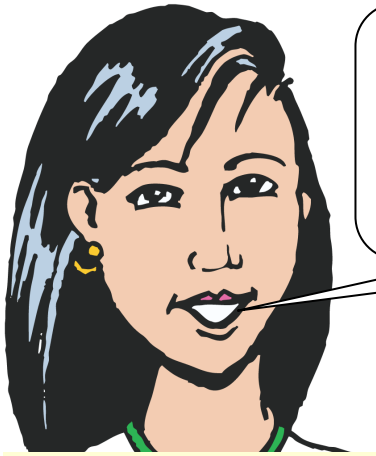

El perro entró  
corriendo

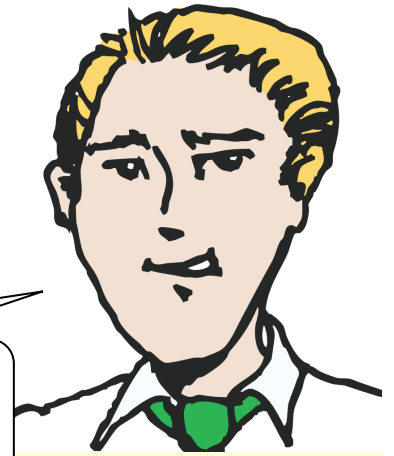

Hunden løp inn

On a semantic map these  
differences disappear

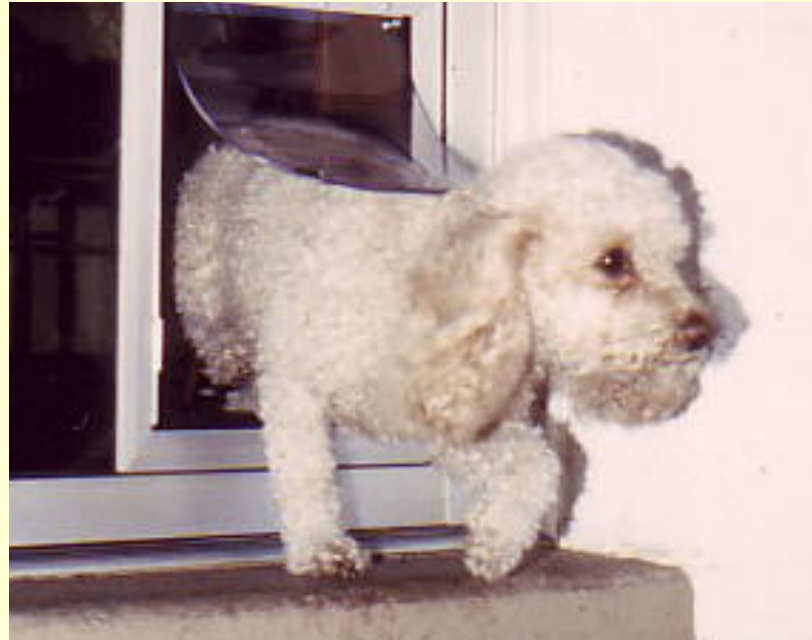

# Different metaphors

- Human beings cannot perceive time directly, and it seems that all languages use the TIME IS SPACE metaphor
  - But different languages use different versions of this metaphor
    - Expressions for *before* vs. *after*
    - Aspect in Russian

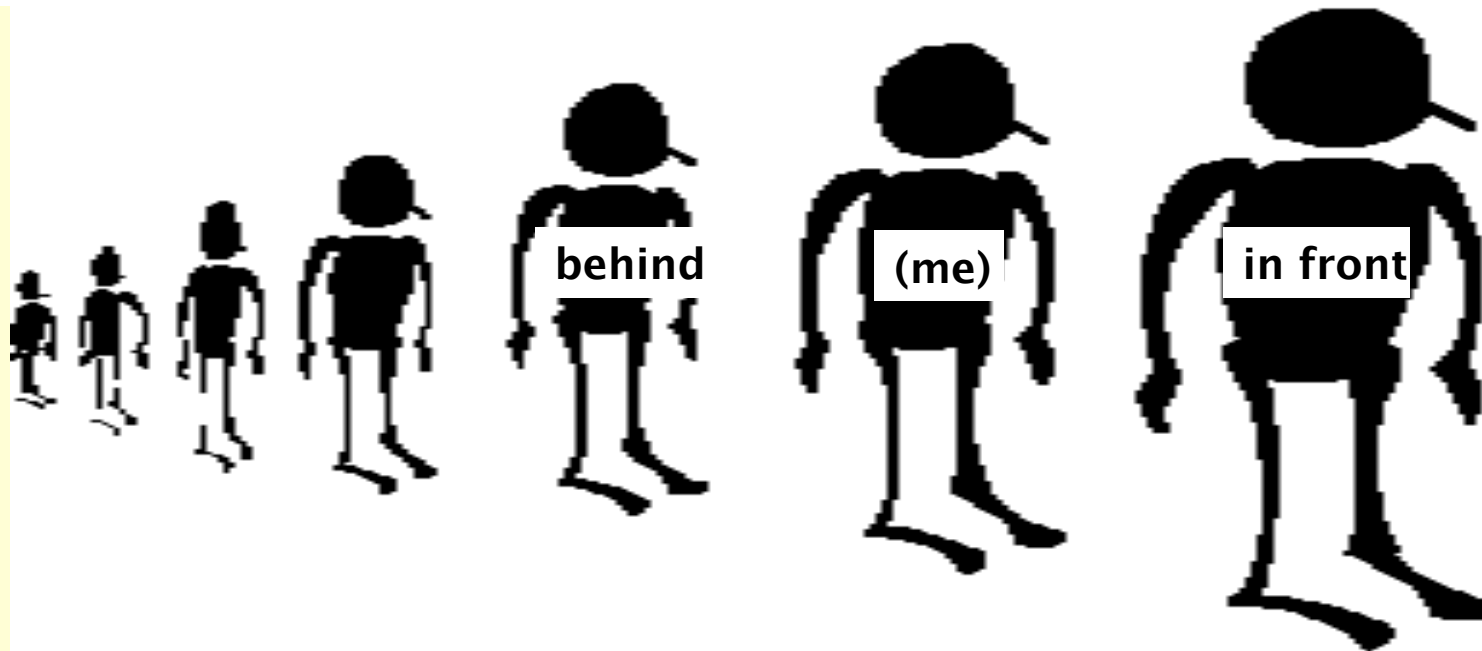

- Haspelmath (1997b: 56–57)
  - Many languages use IN FRONT to express ‘before’
    - German *vor*, Latin *ante*, Polish *przed*, Albanian *para*
  - Fewer languages use BEHIND to express ‘after’
    - Latin *post*, Albanian *pas*

## Aspect in Russian: three (pairs of) metaphors

- Discrete solid object vs. Fluid substance => Perfective vs. Imperfective
- Travel vs. Motion => Completable vs. Non-completable
- Granular vs. Continuous => Singularizable vs. Non-singularizable

# Discrete solid object vs. Fluid substance => Perfective vs. Imperfective

Discrete solid  
object  
=> Perfective

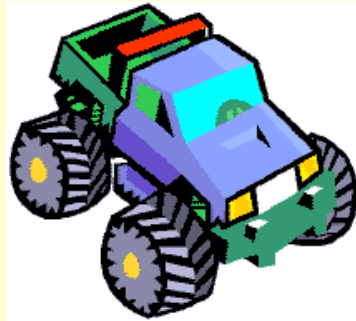

vs.

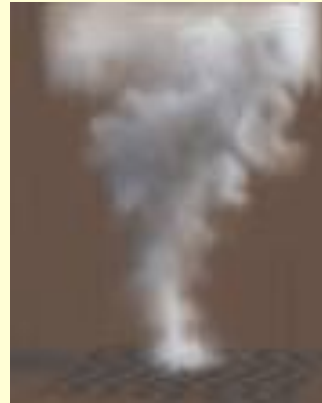

Fluid substance  
=> Imperfective

*Ja napisal roman*  
'I have written a novel'

The event has a shape,  
clear boundaries, etc.

*Ona gotovilas' k*  
*èksamenam*  
'She studied for the exams'

The event has no shape,  
clear boundaries, etc.

# Travel vs. Motion => Completable vs. Non-completable

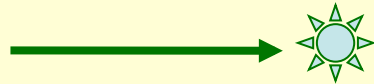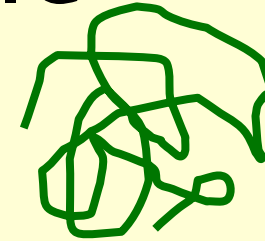

*Pisatel' pišet knigu*  
'The author is writing a book'

The verb can have a  
Natural Perfective:  
*napisat'* 'write  
(until a result is achieved)'

*Professor rabotaet  
v universitete*  
'The professor is working  
at the university'

The verb can have a  
Complex Act Perfective:  
*porabotat'* 'work for a while  
(without a result)'

# Granular vs. Continuous => Singularizable vs. Non-singularizable

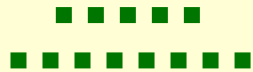

*Mal'čik čixal*  
'The boy sneezed/was  
sneezing'

The verb can have a  
Single Act Perfective:  
*čixnut* 'sneeze (once)'

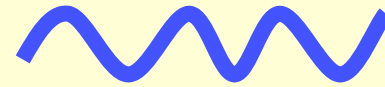

*Mal'čik igral vo dvore*  
'The boy played outside'

# Metaphorical differences can't be accommodated in semantic maps

- The metaphorical system for aspect in Russian is very complex
  - Other languages probably use other metaphors for aspect
  - A semantic map has to ignore metaphorical differences
  - How can one make comparisons across a number of different metaphorical systems?

# Semantic maps of aspectual expressions

- Dahl (1985): expressions for 250 types of events from 64 languages
  - Goal: to find out which expressions cluster together (rejecting the notion that these groups represent universal categories)
- Croft & Poole (2008): used Dahl's data and applied more sophisticated mathematical analysis (Multi Dimensional Scaling)
  - Goal: to find universal categories

# Other questions

- Dahl (1985) used data from 64 languages, but there are perhaps as many as 7000 languages in the world
  - Do we want to base a theory on only 0.9% of the relevant data?
- Dahl (1985) researched expressions for 250 types of events
  - Do we know that these 250 types of events are precisely the ones that represent all the differences that a human being can perceive and encode in language?

?

?

?

# Conclusions

- Some theorists (Croft, Poole, Haspelmath) claim that
  - a) A single universal conceptual space exists
  - b) The grammar of each language is the sum of the “lines” drawn by that language across this single shared space

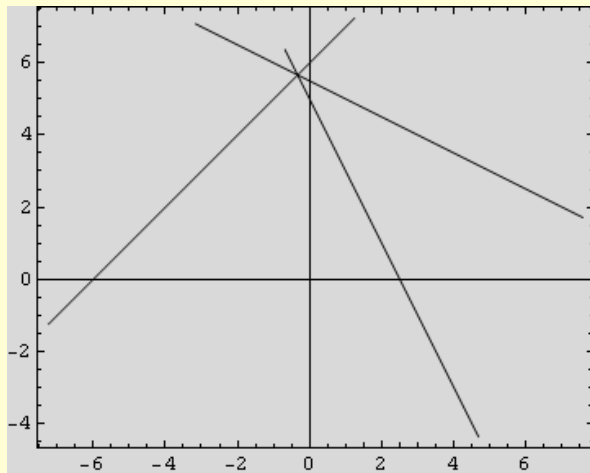

Is this what we think  
a grammar looks like?

# What does it mean to make linguistic comparisons?

- We don't know whether a single universal conceptual space exists
- It is possible that different languages “inhabit” different conceptual spaces
- A semantic map necessarily ignores the meanings that motivate points of usage and the continuous fields between them
- We don't know whether the things that are compared on a semantic map can be compared at all

# Summary

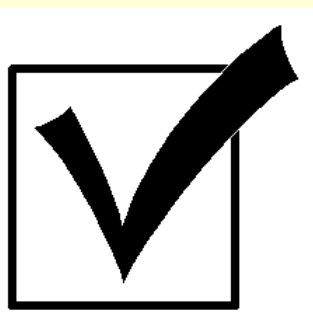

- Semantic maps can
  - Help us to visualize complex data
  - Help us to find a pattern across a number of languages

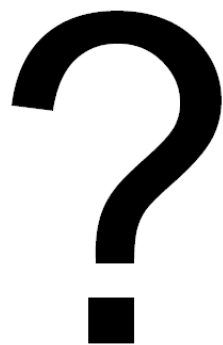

- But we must be cautious and remember that
  - We still know very little about conceptual space and whether it is universal or not
  - A semantic map is a relatively discrete model and it may conflate data that is incommensurate

# Many thanks to:

- Steven Clancy, William Croft, Östen Dahl, Martin Haspelmath, Ronald Langacker, Johan van der Auwera, who shared their ideas with me
