# Supplementary material
Source: publisher figshare collection journal article supplement (https://brill.figshare.com/articles/dataset/_/7092860)
Supplement: Supplementary file 1 [file 1 › Janda 9. ling concepts handout.pdf]

“Linguistic Concepts as Prototype-Based Categories: Reexamining Allomorphy  
Laura A. Janda

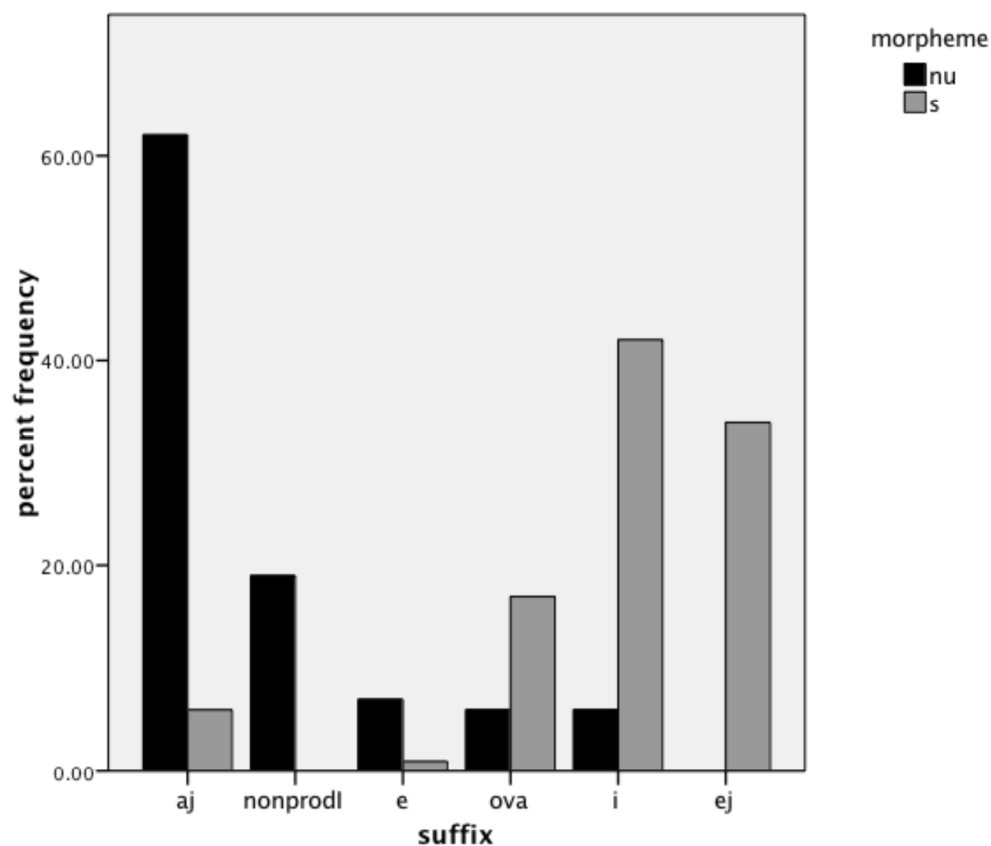

Table 1: Distribution of semelfactive morphemes by verb class

|              | base verbs that form <i>-nu-</i> semelfactives |             | base verbs that form <i>s-</i> semelfactives |             |
|--------------|------------------------------------------------|-------------|----------------------------------------------|-------------|
|              | raw frequency                                  | % frequency | raw frequency                                | % frequency |
| <i>-aj-</i>  | 185                                            | 62%         | 6                                            | 6%          |
| non-prod I   | 56                                             | 19%         | 0                                            | 0%          |
| *-ě-         | 21                                             | 7%          | 1                                            | 1%          |
| <i>-ova-</i> | 17                                             | 6%          | 18                                           | 17%         |
| <i>-i-</i>   | 17                                             | 6%          | 44                                           | 42%         |
| *-ěj-        | 0                                              | 0%          | 36                                           | 34%         |
| Totals:      | 296                                            | 100%        | 105                                          | 100%        |

chi-square = 257.3, with 5 degrees of freedom and p-value < 2.2e-16  
Cramer's V (effect size) = 0.8

Table 2: Semantic classes of base verbs as listed in the Russian National Corpus

|             | sound | impact | move | physiol | speech | behav | other |
|-------------|-------|--------|------|---------|--------|-------|-------|
| <i>-nu-</i> | 56    | 58     | 80   | 21      | 21     | 3     | 30    |
| <i>s-</i>   | 0     | 0      | 15   | 2       | 8      | 7     | 5     |

This talk summarizes the synchronic findings in this article:

Dickey, Stephen M. and Laura A. Janda. 2009. *Xoxotnul, sxitril*: The relationship between semelfactives formed with *-nu-* and *s-* in Russian. *Russian Linguistics* 33. 229-248.

### Additional References

- 17 vol dictionary = Akademija Nauk SSSR. 1950–65. Slovar' sovremennogo russkogo literaturnogo jazyka. Moscow: Izdatel'stvo Akademii nauk SSSR.
- Bermel, N.: 1997. *Context and the Lexicon in the Development of Russian Aspect*. (=Linguistics 129). Berkeley: University of California Press.
- Bloomfield, L.: 1935. *Language*. London.
- Böttger, K.: 2004. "Grammaticalization the Derivational Way: The Russian Aspectual Prefixes *PO-*, *ZA-*, *OT-*", in Bisang, W., N. P. Himmelfmann, and B. Wiemer (eds.) *What Makes Grammaticalization? A Look From its Fringes and its Components*, Mouton de Gruyter, pp. 187-209.
- Dickey, S. M.: 2000. "Expressing Ingressivity in Slavic: The Contextually-Conditioned Imperfective Past vs. the Phase Verb *stat'* and Procedural *za-*", *Journal of Slavic Linguistics* 7(1), 11-44.
- Dickey, S. M.: 2003. "'Semelfactive' *-nq-* and the Western Aspect Gestalt", *Journal of Slavic Linguistics* 10(1), 29-52.
- Dickey, S. M.: 2005. "*S-/Z-* and the Grammaticalization of Slavic Aspect", *Slovene Linguistic Studies* 5, 3-55.
- Dickey, S. M.: 2007. "A Prototype Account of the Development of Delimitative *PO-* in Russian", in Divjak, D. and A. Kochańska (eds.), *Cognitive Paths into the Slavic Domain*, Mouton de Gruyter, pp. 326-71.
- Dickey, S. M.: 2008. "Prefixes in the Grammaticalization of Slavic Aspect: Telic *s-/z-*, Delimitative *PO-* and Language Change via Expansion and Reduction", in Brehmer, B., K. B. Fischer and G. Krumbholz (eds.), *Aspekte, Kategorien und Kontakte slavischer Sprachen: Festschrift für Volkmarr Lehmann zum 65. Geburtstag*, Hamburg: Verlag Dr. Kovač, pp. 96-108.
- Dickey, S. M.: Forthcoming. "Common Slavic 'Indeterminate' Motion Verbs Were Really Manner-of-Motion Verbs", in Driagina-Hasko, V. and R. Perelmutter (eds.), *Motion Verbs in Slavic*, Amsterdam: John Benjamins.
- Dickey, S. M. and J. Hutcheson.: 2003. "Delimitative Verbs in Russian, Czech and Slavic", in Maguire, R. A. and A. Timberlake (eds.), *American Contributions to the 13th International Congress of Slavists. Volume I: Linguistics*, Slavica Publishers, pp. 23-36.
- Holden, K. T.: 1990. "The functional evolution of aspect in Russian", in Thelin, N. (ed.) *Verbal aspect in discourse*, Amsterdam: John Benjamins, pp. 131-158.
- Isačenko, A. V.: 1960. *Grammaticeskij stroj russkogo jazyka v sopostavlenii s slovackim. Čast' vtoraja: morfologija*. Bratislava: Izdatel'stvo akademii nauk.
- Janda, L. A.: 2007. "Aspectual clusters of Russian verbs", *Studies in Language* 31(3), 607-648.
- Janda, L. A.: 2008a. "Metonymy via Perfectivization of Russian Verbs". *Slavica Helsingiensia* 35 (= *S ljubov'ju k slovu. Festschrift in Honour of Professor Arto Mustajoki on the Occasion of his 60<sup>th</sup> Birthday*), 77-85.
- Janda, L. A.: 2008b. "Motion Verbs and the Development of Aspect in Russian", *Scando-Slavica* 54, 179-197.
- Janda, L. A.: 2008c. "Semantic Motivations for Aspectual Clusters of Russian Verbs", in Bethin, C. Y. (ed.), *American Contributions to the 14th International Congress of Slavists, Ohrid, September 2008*, Bloomington, IN: Slavica Publishers, pp. 181-196.
- Janda, L. A.: Forthcoming a. "Prefixed Perfectives from Non-Determined Motion Verbs in Russian", in Driagina-Hasko, V. and R. Perelmutter (eds.), *Motion Verbs in Slavic*, Amsterdam: John Benjamins.
- Janda, L. A.: Forthcoming b. "Totally normal chaos: The aspectual behavior of Russian motion verbs", *Harvard Ukrainian Studies* 28.
- Janda, L. A. and J. J. Korba.: 2008. "Beyond the pair: Aspectual clusters for learners of Russian", *Slavic and East European Journal* 52(2), 254-270.
- King, B. M. and E. W. Minium.: 2008. *Statistical Reasoning in the Behavioral Sciences* (5<sup>th</sup> edition). Hoboken, New Jersey: John Wiley & Sons.
- Makarova, A. and L. A. Janda.: Forthcoming. "Single Act Perfectives: The aspectual relationships of Russian *-nu-* semelfactives".
- Maslov, J. S.: 1948. "Vid i lekičeskoe značenie glagola v russkom jazyke", in *Izvestija Akademii nauk SSSR: Otdelenie literatury i jazyka* 7(4), 303–316.
- Matthews, P. H. 1974. *Morphology*. Cambridge: Cambridge University Press.
- MSDJa = Sreznevskij, I. I. (1958) *Materialy dlja slovarja drevnerusskogo jazyka po pis'mennym pamjatnikam*. Moscow: Gosudarstvennoe izdatel'stvo inostrannyx i nacional'nyx slovarnej.
- Neset, T. and L. A. Janda.: Forthcoming. "Paradigm structure: evidence from Russian suffix shift".
- Nikiforov, S. D.: 1952. *Glagol: Ego kategorii i formy v russkoj pis'mennosti vtoroj poloviny XVI veka*. Moscow: Izdatel'stvo AN SSSR.

- Nørgård-Sørensen, J.: 1997. "Tense, aspect and verbal derivation in the language of the Novgorod birch bark letters", *Russian Linguistics* 21, 1-21.
- Rakhilina, E.: 2004. "There and back: the case of Russian go" in Janda, L. A. and T. Nessel (eds.), *Times and Cases: A View of Slavic Conceptualizations*. Published as *Glossos* 5 at <http://www.seelrc.org/glossos/>. 33pp.
- RBS = Ja. Kalas, K. Krapiva and P. Glebka, eds. 1993 *Russko-belorusskij slovar'*. 4th edition. Minsk: Belaruskaja ěncyklapedyja.
- RUS = K. Bilodid, et al., eds. 1968. *Russko-ukrainskij slovar'*. Kiev: Naukova dumka.
- Rutkowska, M.: 1981. *Nie znane polszczyźnie rosyjskie prefigowane derywate odczasownikowe z elementem -sja typu doleżat'sja, priest'sja*. Wrocław: Komitet Słowianoznawstwa. (= *Komitet Słowianoznawstwa, Monografie Sławistyczne* 43).
- Schuyt, R.: 1990. *The Morphology of Slavic Verbal Aspect: A Descriptive and Historical Study*. Amsterdam/Atlanta: Rodopi.
- Shull, S.: 2003. *The Experience of Space: The Privileged Role of Spatial Prefixation in Czech and Russian*. Munich: Kubon & Sagner.
- Sigalov, P. S.: 1963. "Glagoly s suffiksom -anú- (-onú-) v russkom jazyke", *Učenyje zapiski Leningradskogo gosudarstvennogo universiteta* 322 (*Serija filologičeskix nauk, vypusk* 68), 64-79.
- Sigalov, P. S.: 1975 "Istorija russkix ograničitel'nyx glagolov", *Trudy po russkoj i slavjanskoj filologii: Serija lingvističeskaja* 24, 141-181.
- Słoński, S.: 1937. *Funkcje prefiksów werbalnych w języku starosłowiańskim (starobułgarskim)*. Warsaw: Nakład Towarzystwa Naukowego Warszawskiego.
- SRJA XI-XVII = Bogatova, et al., eds. 1996-2002. *Slovar' russkogo jazyka XI ~ XVII vv. Vypuski* 23-26. Moscow: Nauka.
- Švedova, N. Ju. et al.: 1980. *Russkaja grammatika* vol. I. Moscow: Akademija nauk SSSR.
- VTSSUM = V. T. Busel, eds. 2005. *Velykij tlumačnyj slovník sučasnoji ukrajin'skoji movy*. Kiev: Perun.
- Xlebnikova-Prokopovič, E. N.: 1956. "Glagol'noe formoobrazovanie pri pomošči pristavok v pamjatnikax russkoj pis'mennosti vtoroj poloviny VXII veka", *Doklady i soobščeniya Instituta jazykoznanija AN SSSR* 10, 130-155.
- Zaliznjak, A. A.: 1980. *Grammatičeskij slovar' russkogo jazyka*. Moscow: Russkij jazyk.
- Zaliznjak, A. A. and A. D. Šmelev.: 2000. *Vvedenie v russkiju aspektologiju*. Moscow: Jazyki russkoj kul'tury
