# Supplementary material
Source: publisher figshare collection journal article supplement (https://brill.figshare.com/articles/dataset/_/7092860)
Supplement: Supplementary file 1 [file 1 › Janda 10. paradigm structure.ppt.pdf]

# **The Paradigm as a Radial Category**

**Tore Nessel & Laura A. Janda**

**CLEAR-group (Cognitive Linguistics – Empirical Approaches to Russian)**

**University of Tromsø**

# Overview

- Russian suffix shift
- The status of the paradigm
- The structure of the paradigm
- What structure do we expect for Russian verbal paradigms?
- Does Russian suffix shift conform to the expected structure?
- What about frequency?

# Suffix shift in Russian verbs

- An ongoing language change:
- Unproductive suffix *-a* is replaced by productive *-aj*
  - *kapljut* (with *-a*) → *kapajut* ‘(they) drip’
  - *Slezy kapljut odna za drugoj na klaviši.* ‘The tears drip one after another onto the keyboard.’
  - *Slezy v šči kapajut.* ‘The tears drip into the cabbage soup.’
  - Well-known, described in the scholarly literature
- We examine a database of ca. 20,000 examples from the Russian National Corpus
- Suffix shift progresses **unevenly** through the paradigm

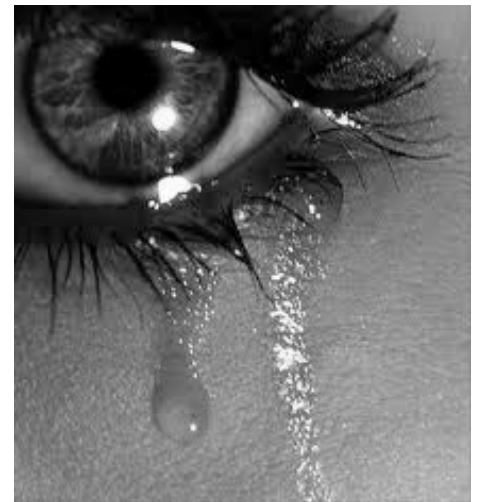

## More about Russian suffix shift: –*a* suffixed vs. –*aj* suffixed forms

- –*aj* is the productive pattern
- –*aj* eliminates a consonant alternation (*p* ~ *pl'* in *kapat'*)
- –*a* vs. –*aj* forms differ (see handout):
  - all Non–Past tense forms
  - Present Active Participle
  - Gerund

–*a* and –*aj* forms are the same:

- Infinitive
- all Past tense forms

**These will  
be ignored**

# The status of the paradigm

- Paradigms are a legacy from classical grammarians of Greece and Rome
- Some contemporary linguistic theories reject the paradigm altogether:
  - Item & Arrangement/Item & Process (Hockett 1958)
  - Distributed Morphology (Halle & Marantz 1993)
  - in such theories, the lexicon contains morphemes, the grammar specifies rules for combining them

# Evidence for paradigms

- McCreight & Chvany (1991) show that paradigms facilitate better descriptions of syncretism than syntactic features
- Milin et al. (2008) report that increased complexity of paradigms yields longer response times in psycholinguistic experiments

# The structure of the paradigm

- Aristotelian category
  - An unordered list of inflected forms
  - All forms have the same status
  - Paradigms lack internal structure
  - Word & Paradigm (Matthews 1972)
- Radial category (Lakoff 1987)
  - Paradigms have internal structure
  - Prototypical vs. peripheral forms

|   | Sg | Pl |
|---|----|----|
| 1 |    |    |
| 2 |    |    |
| 3 |    |    |

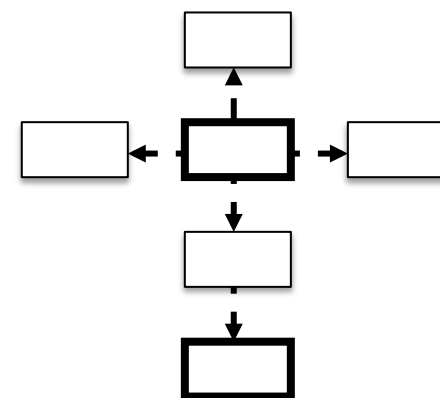

**Can the question of paradigm structure be investigated empirically?**

# Our approach

- Language change: empirical predictions
  - Paradigm = aristotelian category
    - All forms affected to same degree
  - Paradigm = radial category
    - Peripheral forms affected most
- Statistical analysis
  - Logistic Mixed Effects Modeling
  - Systematic analysis of various factors
  - Thanks to R. Harald Baayen

Our analysis indicates that paradigms have structure.

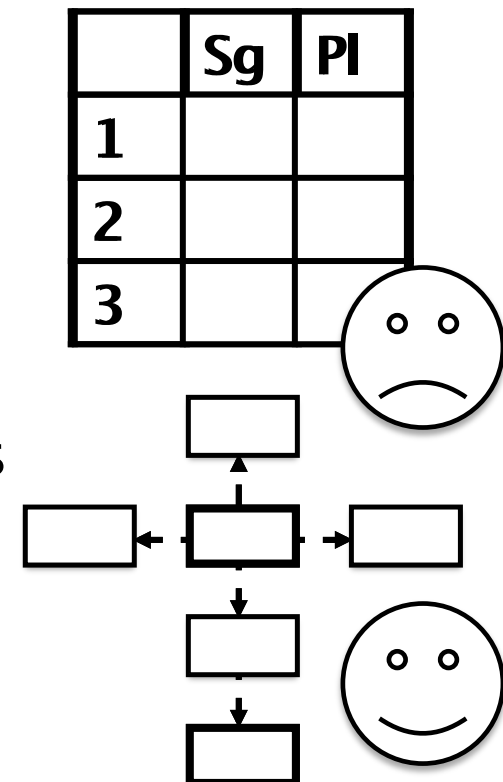

# What structure do we expect for Russian verbal paradigms?

- What parts of the paradigm should be prototypical vs. peripheral?
- What categories are expressed in the Russian verbal paradigm?
  - finite vs. non-finite
  - indicative vs. imperative
  - person
  - number

# finite vs. non-finite

- In Russian, gerunds and participles are non-finite because they cannot express mood
- Finite forms are more prototypical than non-finite forms (Bybee 1985, Joseph 1983)

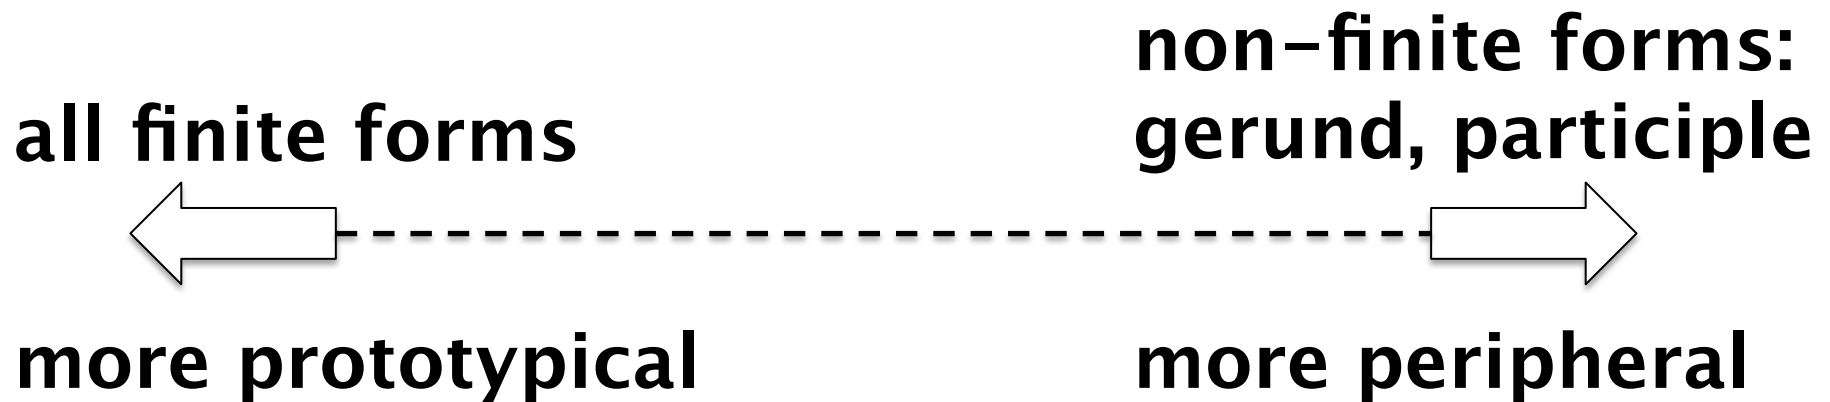

# indicative vs. imperative

- Indicative is more prototypical since it represents the simple relationship of a situation to reality
- Typologically verbs rarely lack indicative forms, but there are often verbs that lack imperative forms (modals, perception verbs)
- Imperatives have reduced person opposition and clitic placement (Joseph 1983)

**all indicative forms**

**imperative**

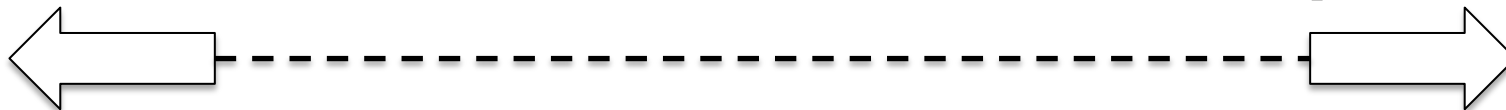

**more prototypical**

**more peripheral**

# Relationship between person and number

|                 | Sg           | Pl   |
|-----------------|--------------|------|
| 1 <sup>st</sup> | ja           | my   |
| 2 <sup>nd</sup> | ty           | vy   |
| 3 <sup>rd</sup> | on, ona, ono | on'i |

| Sg               | Pl  |
|------------------|-----|
| moj              | naş |
| tvoj             | vaş |
| jevo, jejo, jevo | ix  |

| Sg                | Pl                               |
|-------------------|----------------------------------|
| -u                | -V <sub>1</sub> m                |
| -V <sub>1</sub> s | -V <sub>1</sub> t <sup>l</sup> e |
| -V <sub>1</sub> t | -V <sub>2</sub> t                |

The major distinction is: 3rd person vs. 1st/2nd person. This indicates that person ranks above number.

# 3rd person vs. 1st & 2nd person

- Typologically zero expression is more common for 3rd person than for 1st & 2nd person (Bybee 1985)
- 3rd person is unmarked (Lyons 1977)

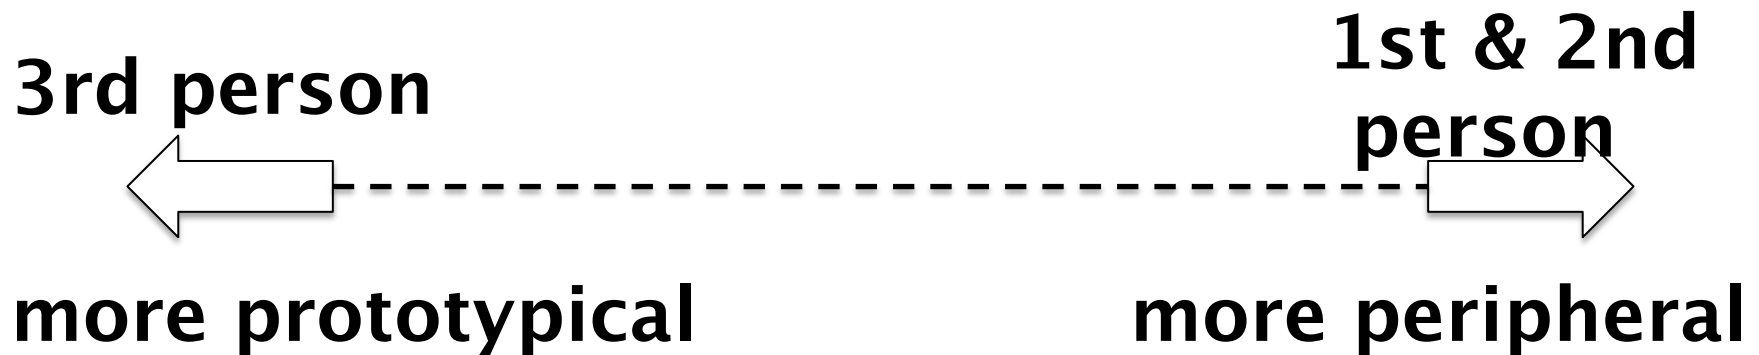

# singular vs. plural

- Cross-linguistically, singular is unmarked (Janda 1995, Corbett 2000, Lyashevskaya 2004)

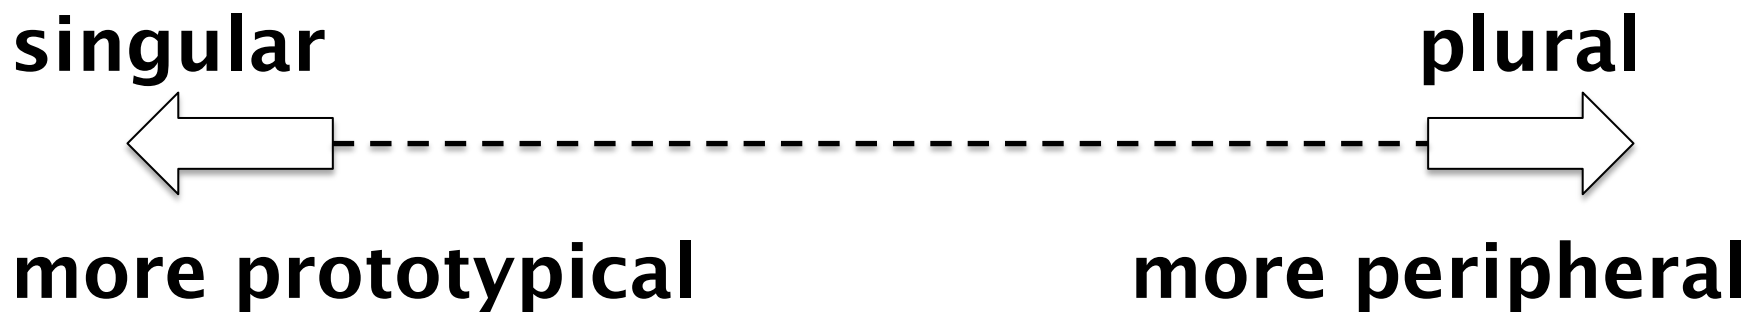

# Prototypical vs. peripheral forms

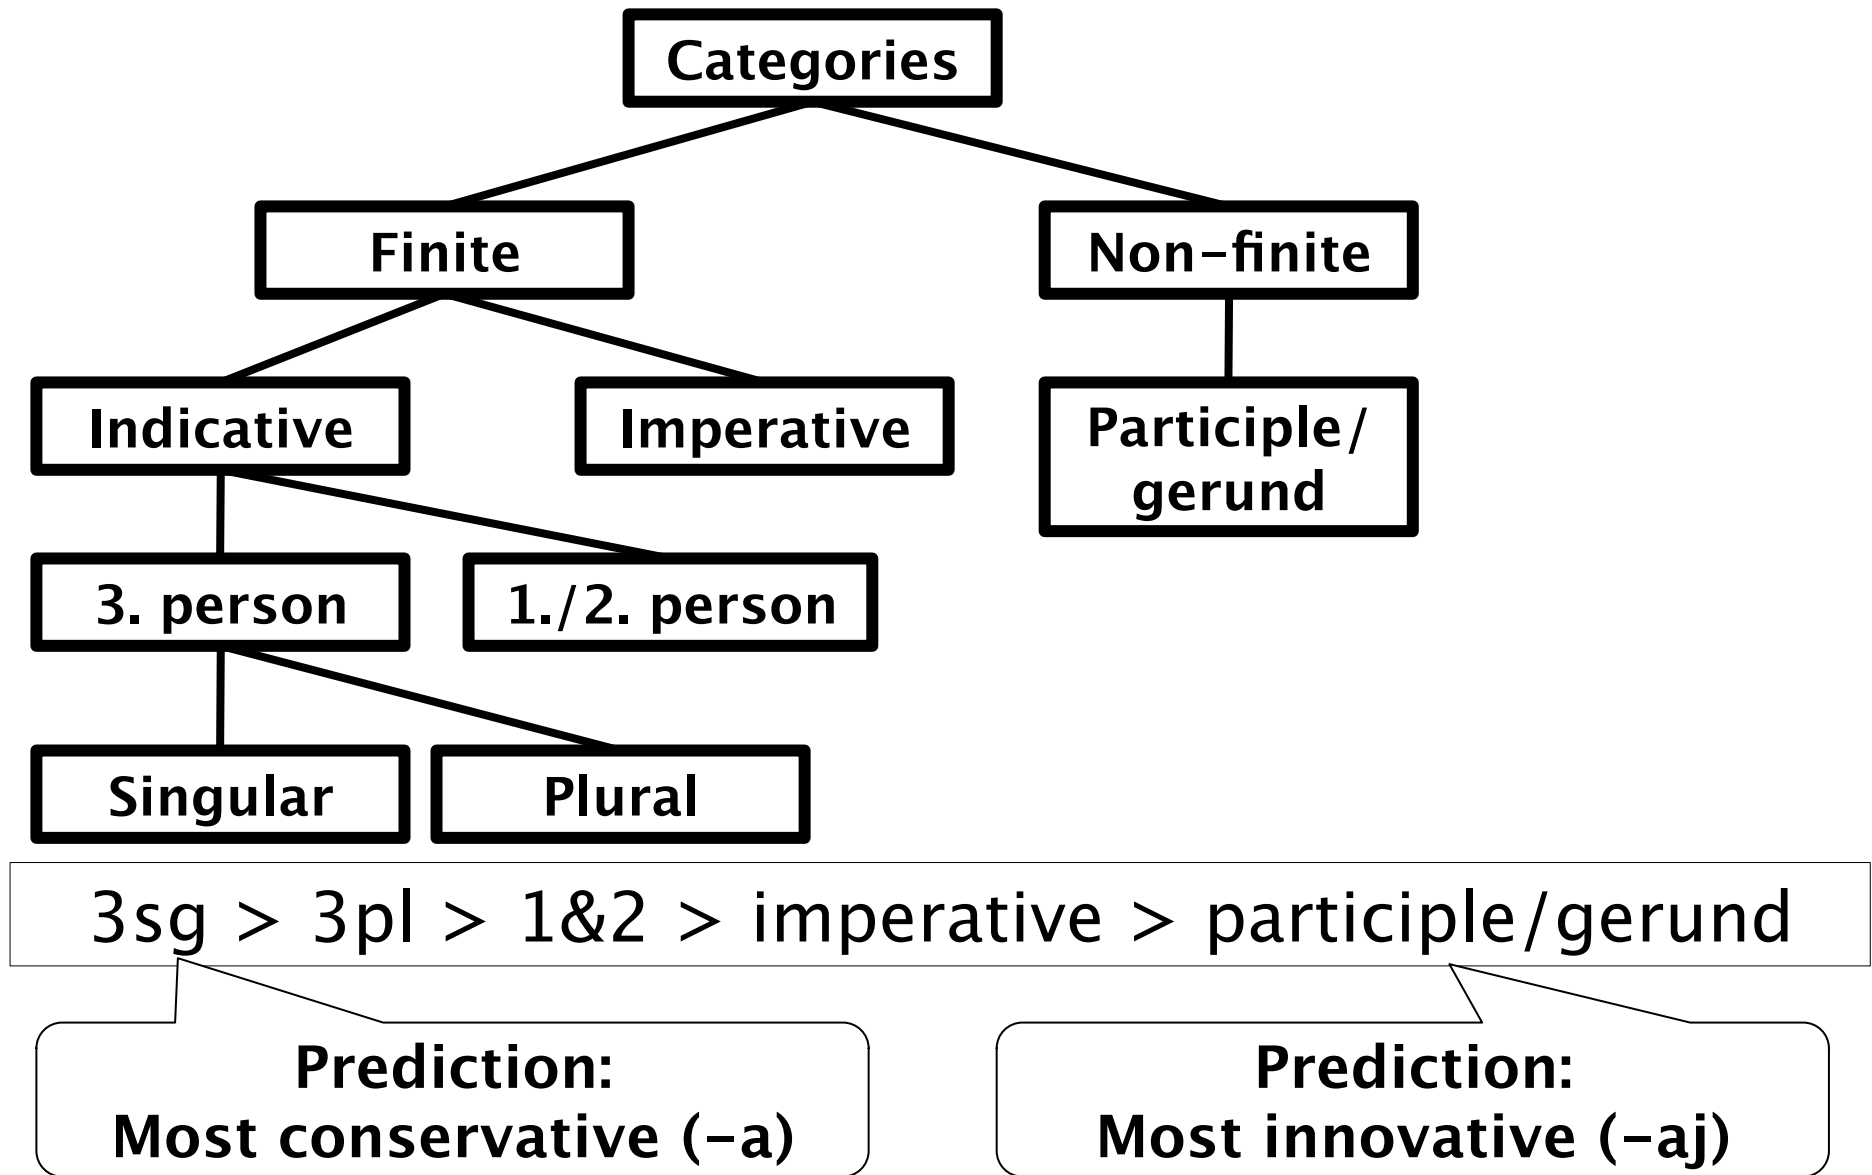

# Results

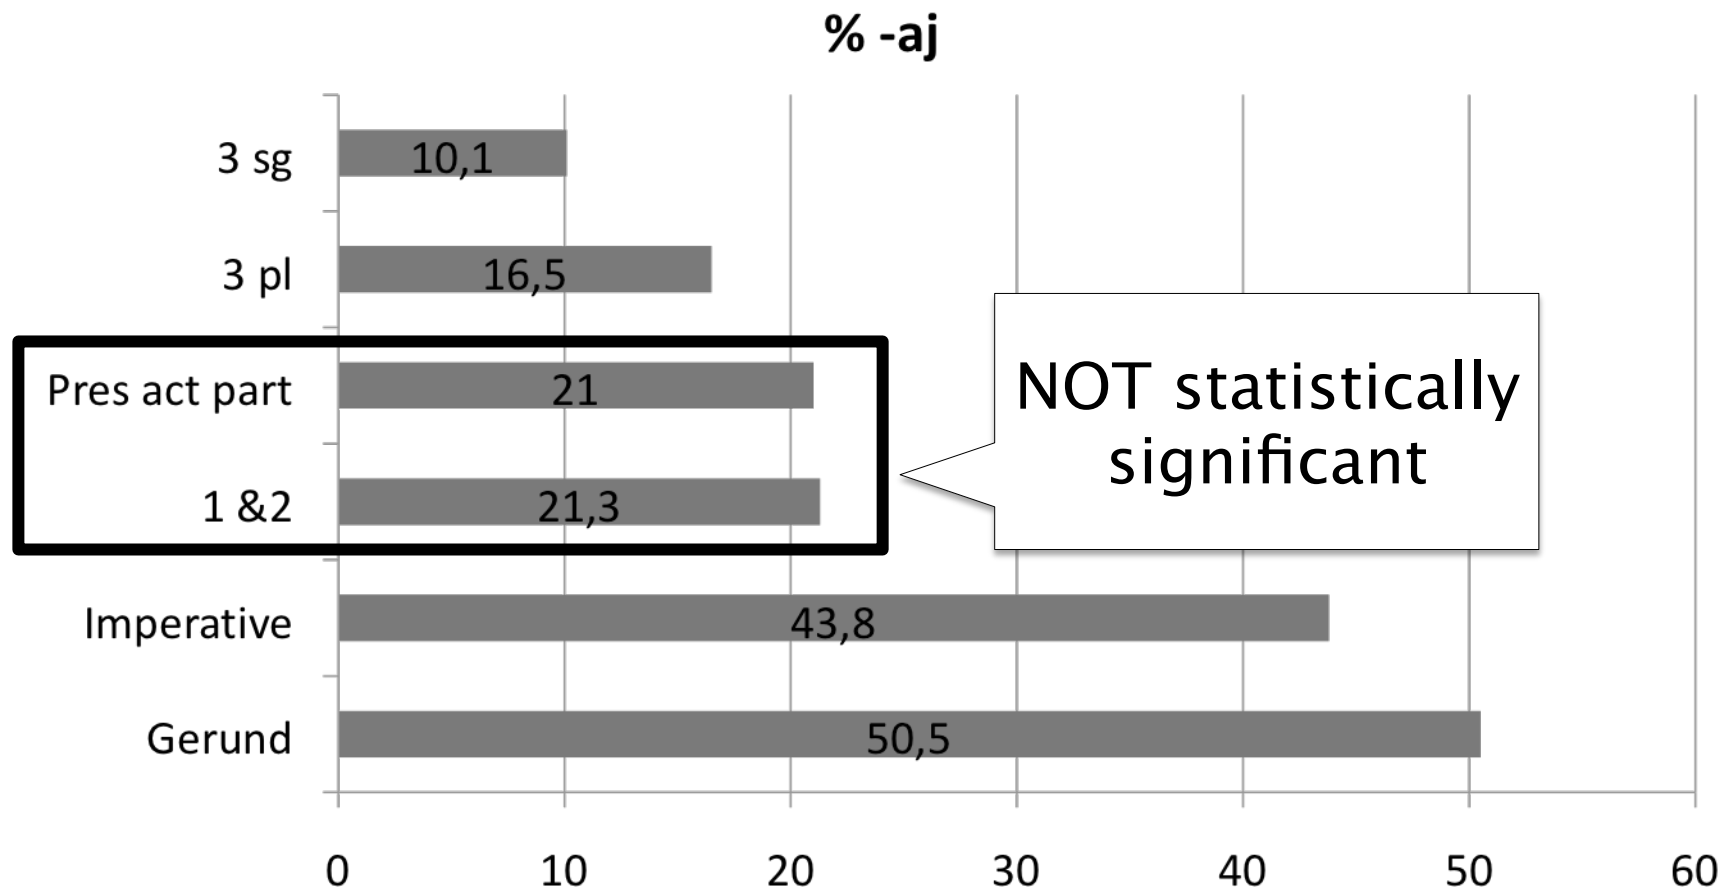

Other differences are statistically significant

# Predictions vs. results

- |                                                                                                                                                                                                                               |                                                                                                                                                                                                                           |
|-------------------------------------------------------------------------------------------------------------------------------------------------------------------------------------------------------------------------------|---------------------------------------------------------------------------------------------------------------------------------------------------------------------------------------------------------------------------|
| <ul style="list-style-type: none"><li>• Predictions:<ul style="list-style-type: none"><li>• 3 sg</li><li>• 3 pl</li><li>• 1. &amp; 2. person</li><li>• imperative</li><li>• gerund/<br/><b>participle</b></li></ul></li></ul> | <ul style="list-style-type: none"><li>• Results:<ul style="list-style-type: none"><li>• 3 sg</li><li>• 3 pl</li><li>• 1. &amp; 2. person/<br/><b>participle</b></li><li>• imperative</li><li>• gerund</li></ul></li></ul> |
|-------------------------------------------------------------------------------------------------------------------------------------------------------------------------------------------------------------------------------|---------------------------------------------------------------------------------------------------------------------------------------------------------------------------------------------------------------------------|

The results indicate that the predictions are correct.  
Problem: The **participle** behaves like a finite form.

# Why does the participle behave like a finite form?

- Hypothesis:
  - Form overrides prototypicality
- 3 pl has suffixes:        **-ut ~ -at**
- Part. has suffixes:       **-ušč ~ -ašč**
- “Parasitic formation”:
  - The participle “borrows” the vowel from the 3pl form
  - This formal resemblance relates the participle to the finite forms
  - This formal resemblance influences the participle, causing it to behave like a finite form in relation to suffix shift

# What about frequency?

Alternative hypothesis:

The least frequent forms are most prone to undergo suffix shift

- Prototypicality ranking:
  - 3 sg
  - 3 pl
  - 1. & 2. person
  - imperative
  - gerund
- Frequency ranking:
  - 3 sg
  - 3 pl
  - **GERUND**
  - 1. & 2. person
  - imperative

Frequency yields incorrect predictions for the **GERUND**.

# Frequency: Written vs. Spoken

- Perhaps the gerund has high frequency because **spoken Russian** is underrepresented in the corpus?

|               | # lemmas   | # gerunds | % gerunds |
|---------------|------------|-----------|-----------|
| Whole corpus  | 13,581,979 | 501,036   | 3.7       |
| Spoken corpus | 135,326    | 1,522     | 1.1       |

- Difference is statistically significant ( $p < 2.2e-16$ )
- Effect size is less than “small” (Cramers  $V = 0,01$ )
- Indicates that frequency difference between spoken and written language has minimal impact
- Cannot exclude the possibility that frequency is relevant

# Summary

## 1. Suffix shift

- is sensitive to morphosyntactic features:
  - 3sg is most conservative form (*-a*)
  - Gerund is most innovative (*-aj*)
- Paradigm structure:
  - Results are compatible with the hypothesis that paradigms are radial categories with internal structure
- Frequency:
  - It is possible, but not likely, that frequency is of decisive importance
